# Supplementary material for: Direct and Indirect Transcriptional Effects of Abiotic Stress in Zea mays Plants Defective in RNA-Directed DNA Methylation
Source: Front Plant Sci. 2021 Aug 19;12:694289. doi: 10.3389/fpls.2021.694289 (PMC8418275; doi:10.3389/fpls.2021.694289)
Supplement: Supplementary Table 1 — List of DEGs for mop1 ABA-treated samples. [file Table_1.XLSX]

## Sheet: C 1h up MOP1 siRNA
1h Group C UP (97)	with MOP1 siRNA	with MOP1 siRNA	with GRN hits	with GRN hits
Zm00001d052194	Zm00001d002025	GRMZM2G086573	Zm00001d002025	GRMZM2G086573
Zm00001d039011	Zm00001d002093	GRMZM2G372102	Zm00001d002364	GRMZM2G068967
Zm00001d018178	Zm00001d002364	GRMZM2G068967	Zm00001d002867	GRMZM2G026926
Zm00001d029816	Zm00001d002589	GRMZM2G164318	Zm00001d004358	GRMZM2G109879
Zm00001d046471	Zm00001d002729	GRMZM2G170509	Zm00001d005609	GRMZM2G082487
Zm00001d012492	Zm00001d002867	GRMZM2G026926	Zm00001d006169	GRMZM2G124037
Zm00001d007083	Zm00001d002966	GRMZM2G062179	Zm00001d011589	GRMZM2G163843
Zm00001d030894	Zm00001d003400	GRMZM2G103116	Zm00001d012285	GRMZM2G143640
Zm00001d030998	Zm00001d003554	GRMZM2G331701	Zm00001d014938	GRMZM2G111760
Zm00001d012381	Zm00001d003750	AC233887.1_FG006	Zm00001d015521	GRMZM2G060485
Zm00001d050119	Zm00001d003784	GRMZM2G076584	Zm00001d017422	GRMZM2G117164
Zm00001d008577	Zm00001d004243	GRMZM2G154685	Zm00001d018119	GRMZM2G045883
Zm00001d051239	Zm00001d004358	GRMZM2G109879	Zm00001d018178	GRMZM2G479760
Zm00001d042880	Zm00001d005609	GRMZM2G082487	Zm00001d024200	GRMZM2G092363
Zm00001d021812	Zm00001d006016	GRMZM2G134334	Zm00001d025055	GRMZM2G159811
Zm00001d012398	Zm00001d006169	GRMZM2G124037	Zm00001d027901	GRMZM2G445634
Zm00001d041491	Zm00001d006417	GRMZM2G158191	Zm00001d028752	AC208201.3_FG002
Zm00001d012285	Zm00001d007027	GRMZM2G123212	Zm00001d041491	GRMZM2G104396
Zm00001d033256	Zm00001d007083	GRMZM2G350773	Zm00001d047732	GRMZM2G465287
Zm00001d002729	Zm00001d007341	GRMZM2G154735	Zm00001d050195	GRMZM2G148561
Zm00001d005609	Zm00001d008214	GRMZM2G140994	Zm00001d051239
Zm00001d050988	Zm00001d008577	GRMZM2G333635
Zm00001d047883	Zm00001d008782	GRMZM2G125020
Zm00001d014745	Zm00001d009568	GRMZM2G311898
Zm00001d047302	Zm00001d011589	GRMZM2G163843
Zm00001d017422	Zm00001d011755	GRMZM2G107570
Zm00001d006169	Zm00001d012285	GRMZM2G143640
Zm00001d003400	Zm00001d012325	GRMZM2G147544
Zm00001d029218	Zm00001d012381	GRMZM2G169259
Zm00001d021457	Zm00001d012398	GRMZM2G337819
Zm00001d028752	Zm00001d012492	GRMZM2G019612
Zm00001d008782	Zm00001d014745	GRMZM2G478624
Zm00001d046500	Zm00001d014938	GRMZM2G111760
Zm00001d021978	Zm00001d015521	GRMZM2G060485
Zm00001d011589	Zm00001d015767	GRMZM2G111987
Zm00001d004243	Zm00001d017422	GRMZM2G117164
Zm00001d010653	Zm00001d017537	GRMZM2G055435
Zm00001d043525	Zm00001d018119	GRMZM2G045883
Zm00001d014938	Zm00001d018178	GRMZM2G479760
Zm00001d039936	Zm00001d018750	GRMZM2G450822
Zm00001d018750	Zm00001d020556	GRMZM2G114751
Zm00001d046888	Zm00001d020976	GRMZM2G168261
Zm00001d002093	Zm00001d021457	GRMZM2G105419
Zm00001d022154	Zm00001d021812	GRMZM2G103276
Zm00001d033797	Zm00001d021943	GRMZM2G110034
Zm00001d027313	Zm00001d021978	GRMZM2G151649
Zm00001d028410	Zm00001d024200	GRMZM2G092363
Zm00001d002867	Zm00001d025055	GRMZM2G159811
Zm00001d015521	Zm00001d025964	GRMZM2G127776
Zm00001d002966	Zm00001d026095	GRMZM2G001363
Zm00001d012325	Zm00001d027313	GRMZM2G085691
Zm00001d004358	Zm00001d027375	GRMZM2G008773
Zm00001d047187	Zm00001d027537	GRMZM2G093286
Zm00001d027901	Zm00001d027901	GRMZM2G445634
Zm00001d044728	Zm00001d028410	GRMZM2G172537
Zm00001d047841	Zm00001d028752	AC208201.3_FG002
Zm00001d007027	Zm00001d029218	GRMZM2G703582
Zm00001d047045	Zm00001d029233	GRMZM2G108523
Zm00001d034197	Zm00001d029816	GRMZM2G017011
Zm00001d025964	Zm00001d030894	GRMZM2G329655
Zm00001d050019	Zm00001d030998	GRMZM2G052619
Zm00001d003554	Zm00001d033256	GRMZM2G414047
Zm00001d008214	Zm00001d033797	GRMZM5G863645
Zm00001d039176	Zm00001d034197	GRMZM2G420108
Zm00001d002364	Zm00001d038061	GRMZM2G340807
Zm00001d050195	Zm00001d039011	GRMZM2G318180
Zm00001d003784	Zm00001d039176	GRMZM2G142068
Zm00001d027537	Zm00001d039560	GRMZM2G120271
Zm00001d020556	Zm00001d039936	GRMZM2G158232
Zm00001d011755	Zm00001d040048	GRMZM2G018806
Zm00001d043181	Zm00001d041491	GRMZM2G104396
Zm00001d025055	Zm00001d042880	GRMZM2G302245
Zm00001d002025	Zm00001d042922	AC209784.3_FG007
Zm00001d003750	Zm00001d043181	AC213654.3_FG003
Zm00001d029233	Zm00001d043221	AC233851.1_FG009
Zm00001d040048	Zm00001d043525	GRMZM2G051151
Zm00001d021943	Zm00001d043741	GRMZM2G165099
Zm00001d024200	Zm00001d044728	GRMZM2G335242
Zm00001d039560	Zm00001d046471	GRMZM2G051135
Zm00001d015767	Zm00001d046500	GRMZM2G035579
Zm00001d005767	Zm00001d046574	GRMZM2G324248
Zm00001d043741	Zm00001d046888	GRMZM2G085218
Zm00001d007341	Zm00001d047187	GRMZM6G735128
Zm00001d017537	Zm00001d047302	GRMZM2G162968
Zm00001d009568	Zm00001d047732	GRMZM2G465287
Zm00001d006016	Zm00001d047841	GRMZM2G479260
Zm00001d018119	Zm00001d047883	GRMZM2G031447
Zm00001d027375	Zm00001d050019	GRMZM2G054139
Zm00001d043221	Zm00001d050119	GRMZM2G038108
Zm00001d026095	Zm00001d050195	GRMZM2G148561
Zm00001d002589	Zm00001d050988	GRMZM2G132682
Zm00001d047732	Zm00001d051239	GRMZM2G300924
Zm00001d046574	Zm00001d052194	GRMZM2G007729
Zm00001d020976
Zm00001d042922
Zm00001d006417
Zm00001d038061

## Sheet: C 1h down MOP1 siRNA
1h Group C DOWN (76)	with MOP1 siRNA	with MOP1 siRNA	with GRN hits
Zm00001d036775	Zm00001d000195	GRMZM2G133006	GRMZM2G407119
Zm00001d048913	Zm00001d002019	GRMZM2G076212	GRMZM2G054125
Zm00001d002847	Zm00001d002436	GRMZM2G125669	GRMZM2G450445
Zm00001d024103	Zm00001d002847	GRMZM2G354909	GRMZM2G038073
Zm00001d034068	Zm00001d003293	GRMZM2G450445	GRMZM2G175856
Zm00001d007285	Zm00001d003980	GRMZM5G803358
Zm00001d000414	Zm00001d005169	GRMZM2G107956
Zm00001d000195	Zm00001d005306	GRMZM2G055883
Zm00001d024317	Zm00001d005698	GRMZM2G125775
Zm00001d003980	Zm00001d005823	GRMZM2G125482
Zm00001d006759	Zm00001d006759	GRMZM2G113512
Zm00001d024839	Zm00001d007285	GRMZM2G125196
Zm00001d009084	Zm00001d007753	GRMZM2G053206
Zm00001d010735	Zm00001d007789	GRMZM2G135013
Zm00001d007789	Zm00001d008273	GRMZM2G029243
Zm00001d036911	Zm00001d009084	GRMZM2G148904
Zm00001d044106	Zm00001d010344	GRMZM2G163533
Zm00001d002019	Zm00001d010735	AC209819.3_FG003
Zm00001d021936	Zm00001d013744	GRMZM2G363437
Zm00001d020628	Zm00001d014748	GRMZM2G050450
Zm00001d017615	Zm00001d017019	GRMZM2G160710
Zm00001d017019	Zm00001d017084	GRMZM2G038073
Zm00001d017918	Zm00001d017615	GRMZM2G401436
Zm00001d049173	Zm00001d017762	GRMZM2G179147
Zm00001d020702	Zm00001d017918	GRMZM6G880411
Zm00001d016401	Zm00001d019985	GRMZM2G101117
Zm00001d017762	Zm00001d020628	GRMZM2G431288
Zm00001d008273	Zm00001d020702	GRMZM2G009045
Zm00001d020479	Zm00001d021936	GRMZM2G004694
Zm00001d027557	Zm00001d021966	GRMZM6G348677
Zm00001d042104	Zm00001d022081	GRMZM2G167520
Zm00001d029581	Zm00001d022636	GRMZM2G154460
Zm00001d049471	Zm00001d023984	GRMZM2G700208
Zm00001d046667	Zm00001d024103	GRMZM2G405170
Zm00001d024478	Zm00001d024317	GRMZM2G315767
Zm00001d023984	Zm00001d024478	GRMZM2G117319
Zm00001d040468	Zm00001d024839	GRMZM2G132093
Zm00001d002436	Zm00001d024852	GRMZM2G332423
Zm00001d005306	Zm00001d025437	GRMZM2G136508
Zm00001d039822	Zm00001d027557	GRMZM2G475059
Zm00001d005823	Zm00001d028693	GRMZM2G042639
Zm00001d013744	Zm00001d029581	GRMZM2G075892
Zm00001d019985	Zm00001d031728	GRMZM2G175856
Zm00001d051938	Zm00001d033909	GRMZM2G090043
Zm00001d000731	Zm00001d034068	GRMZM2G098892
Zm00001d021966	Zm00001d036775	GRMZM2G162531
Zm00001d014748	Zm00001d036911	GRMZM2G423378
Zm00001d025437	Zm00001d039642	GRMZM2G178209
Zm00001d005698	Zm00001d039822	GRMZM2G463574
Zm00001d040285	Zm00001d040285	GRMZM2G402977
Zm00001d022636	Zm00001d040468	GRMZM2G161310
Zm00001d048814	Zm00001d042104	GRMZM2G028556
Zm00001d043988	Zm00001d042749	GRMZM2G074248
Zm00001d047168	Zm00001d043253	GRMZM2G322728
Zm00001d033909	Zm00001d043988	GRMZM2G453805
Zm00001d024852	Zm00001d044106	GRMZM5G888620
Zm00001d043253	Zm00001d046667	AC233863.1_FG001
Zm00001d000502	Zm00001d047999	GRMZM2G407119
Zm00001d047999	Zm00001d048814	GRMZM2G044104
Zm00001d003293	Zm00001d048861	GRMZM2G421509
Zm00001d010344	Zm00001d048913	GRMZM2G157241
Zm00001d022926	Zm00001d049173	GRMZM2G054125
Zm00001d028693	Zm00001d049471	GRMZM2G309109
Zm00001d007753	Zm00001d049508	AC212227.3_FG006
Zm00001d039642	Zm00001d050157	GRMZM2G417402
Zm00001d031728	Zm00001d051938	GRMZM2G099420
Zm00001d017084	Zm00001d053740	GRMZM2G143457
Zm00001d049241
Zm00001d005169
Zm00001d049081
Zm00001d053740
Zm00001d050157
Zm00001d049508
Zm00001d042749
Zm00001d048861
Zm00001d022081

## Sheet: GRN analysis and zm c down
Group C DOWN GRN targets	V4 matched Group C DOWN GRN targets	V3 ID
445 duplicates, 5005 remaining	Matched ID(s); 4284 of 5005 mapped to Zm	Requested ID
GRMZM2G102189	Zm00001d037435	GRMZM2G136750
GRMZM5G870959	Zm00001d038791	GRMZM2G132212
GRMZM2G145204	Zm00001d024926	GRMZM2G401883
GRMZM2G130877	Zm00001d044332	GRMZM2G019386
GRMZM2G167863	Zm00001d013039	GRMZM2G024150
GRMZM2G410812	Zm00001d043586	GRMZM2G311347
GRMZM2G003640	Zm00001d045077	GRMZM2G151913
GRMZM2G375085	Zm00001d040312	GRMZM2G018951
GRMZM5G874608	Zm00001d007845	GRMZM5G827174
GRMZM2G172365	Zm00001d032229	AC217050.4_FG001
GRMZM2G379770	Zm00001d031766	GRMZM2G055968
GRMZM2G169884	Zm00001d029133	GRMZM2G083689
GRMZM2G110726	Zm00001d038903	GRMZM2G179793
GRMZM2G398057	Zm00001d038125	GRMZM2G153119
GRMZM2G479552	Zm00001d012239	GRMZM2G005374
GRMZM5G806441	Zm00001d002537	GRMZM2G016705
AC202181.3_FG010	Zm00001d027978	GRMZM2G117491
GRMZM5G881064	Zm00001d047800	GRMZM2G063875
GRMZM2G165357	Zm00001d031405	GRMZM2G059012
GRMZM2G460864	Zm00001d031407	GRMZM2G059012
GRMZM2G044027	Zm00001d028541	GRMZM2G397002
GRMZM2G329454	Zm00001d006753	GRMZM2G378106
GRMZM2G307823	Zm00001d007567	GRMZM2G097511
GRMZM2G703807	Zm00001d037278	GRMZM2G059151
GRMZM2G155341	Zm00001d020794	GRMZM2G053779
GRMZM2G359331	Zm00001d011237	GRMZM2G304573
GRMZM2G079308	Zm00001d026368	GRMZM2G023387
GRMZM2G354615	Zm00001d041456	GRMZM2G152421
GRMZM2G046436	Zm00001d052376	GRMZM2G099754
GRMZM5G852505	Zm00001d041768	GRMZM2G092169
GRMZM5G820122	Zm00001d018291	GRMZM2G124460
GRMZM2G164378	Zm00001d036941	GRMZM2G137421
GRMZM2G079891	Zm00001d053001	GRMZM2G036365
GRMZM2G351810	Zm00001d053997	GRMZM2G374088
GRMZM2G306374	Zm00001d003607	GRMZM2G115395
GRMZM2G174160	Zm00001d006316	AC233910.1_FG002
GRMZM2G012284	Zm00001d032801	GRMZM2G163436
GRMZM2G440918	Zm00001d029234	GRMZM2G108530
GRMZM2G128518	Zm00001d040259	EF517601.1_FG015
GRMZM2G418031	Zm00001d047612	GRMZM2G024293
GRMZM2G126917	Zm00001d014165	GRMZM2G418031
GRMZM2G104620	Zm00001d002896	GRMZM2G108228
GRMZM2G364863	Zm00001d050190	GRMZM2G133941
GRMZM2G126580	Zm00001d027971	GRMZM2G106017
GRMZM2G010202	Zm00001d026625	GRMZM2G138870
GRMZM2G144372	Zm00001d046509	GRMZM2G041831
GRMZM2G429213	Zm00001d039005	GRMZM2G031053
GRMZM2G020409	Zm00001d036538	AC207260.3_FG003
GRMZM2G430604	Zm00001d009288	GRMZM2G051790
GRMZM5G894200	Zm00001d022417	GRMZM2G128176
GRMZM2G136624	Zm00001d043096	GRMZM2G010447
GRMZM2G120951	Zm00001d049239	GRMZM2G015295
GRMZM2G082853	Zm00001d043141	GRMZM2G107417
GRMZM2G057491	Zm00001d043142	GRMZM2G107417
GRMZM2G453148	Zm00001d009594	GRMZM2G153977
GRMZM2G065970	Zm00001d039730	GRMZM2G129482
GRMZM2G422877	Zm00001d051012	GRMZM2G104925
GRMZM2G047028	Zm00001d019587	GRMZM2G161587
GRMZM2G008647	Zm00001d030833	GRMZM2G139328
GRMZM2G093781	Zm00001d048214	GRMZM2G091233
AC216870.3_FG005	Zm00001d023580	GRMZM2G103546
GRMZM2G076613	Zm00001d038075	GRMZM2G354338
GRMZM2G094083	Zm00001d048795	GRMZM2G165461
GRMZM2G057590	Zm00001d039175	GRMZM2G141999
GRMZM5G873586	Zm00001d004095	GRMZM2G042893
GRMZM2G348664	Zm00001d054060	GRMZM2G010251
GRMZM2G014979	Zm00001d050406	GRMZM2G099088
GRMZM2G056088	Zm00001d053813	GRMZM2G168629
GRMZM2G380955	Zm00001d048282	GRMZM2G172523
GRMZM5G881066	Zm00001d013692	GRMZM2G018943
GRMZM2G702889	Zm00001d029215	GRMZM2G081322
GRMZM2G050915	Zm00001d019549	GRMZM2G022014
GRMZM2G122687	Zm00001d028130	GRMZM2G005435
GRMZM2G031536	Zm00001d048053	GRMZM2G046729
GRMZM2G017593	Zm00001d045499	GRMZM2G006973
GRMZM2G125151	Zm00001d003117	GRMZM2G086486
GRMZM5G871018	Zm00001d003118	GRMZM2G086486
GRMZM5G853742	Zm00001d028513	GRMZM2G143655
GRMZM2G088653	Zm00001d002791	GRMZM2G152194
GRMZM2G061609	Zm00001d022367	GRMZM2G148176
GRMZM2G304638	Zm00001d022355	GRMZM2G020450
GRMZM2G377539	Zm00001d044042	GRMZM2G466833
GRMZM2G054221	Zm00001d022114	GRMZM2G157598
GRMZM2G095634	Zm00001d051664	GRMZM2G072612
GRMZM5G834171	Zm00001d031346	GRMZM2G438824
GRMZM2G305096	Zm00001d053425	GRMZM2G004835
GRMZM2G032759	Zm00001d027648	GRMZM2G062841
GRMZM2G161507	Zm00001d039923	GRMZM2G412760
GRMZM2G434252	Zm00001d031159	GRMZM2G396477
GRMZM5G867918	Zm00001d051535	GRMZM2G066615
GRMZM2G065953	Zm00001d047563	GRMZM2G317584
GRMZM2G005134	Zm00001d022263	GRMZM2G177715
GRMZM2G014276	Zm00001d016377	AC190526.3_FG004
GRMZM2G346693	Zm00001d035542	GRMZM2G104836
GRMZM2G163178	Zm00001d023735	GRMZM2G127386
GRMZM2G415228	Zm00001d024852	GRMZM2G166616
GRMZM2G133819	Zm00001d032058	GRMZM2G178913
GRMZM2G392791	Zm00001d007072	GRMZM2G327686
GRMZM2G555972	Zm00001d027722	GRMZM2G027821
GRMZM2G439544	Zm00001d017834	GRMZM2G180926
GRMZM5G807064	Zm00001d009054	GRMZM2G434252
GRMZM2G305244	Zm00001d022035	GRMZM2G036203
GRMZM6G636055	Zm00001d008386	GRMZM2G156643
GRMZM2G139805	Zm00001d042427	GRMZM2G151285
GRMZM2G167008	Zm00001d032379	GRMZM2G447433
GRMZM5G844243	Zm00001d043813	GRMZM2G020034
AC182838.3_FG006	Zm00001d033751	GRMZM2G126019
GRMZM2G078116	Zm00001d044525	GRMZM2G372297
GRMZM2G125304	Zm00001d026177	GRMZM2G125023
AC216353.2_FG005	Zm00001d026178	GRMZM2G125023
GRMZM2G113264	Zm00001d039598	GRMZM2G142413
AC187263.4_FG001	Zm00001d036048	GRMZM2G156422
GRMZM2G146200	Zm00001d023811	GRMZM2G075283
GRMZM2G429972	Zm00001d033896	GRMZM2G027059
GRMZM5G879178	Zm00001d012853	GRMZM2G159950
GRMZM2G176699	Zm00001d049661	GRMZM2G062591
GRMZM2G027728	Zm00001d024939	GRMZM2G128651
GRMZM2G427805	Zm00001d034032	GRMZM2G177928
GRMZM2G321239	Zm00001d021959	GRMZM2G096454
GRMZM5G868868	Zm00001d015195	GRMZM2G054706
GRMZM2G474546	Zm00001d036961	GRMZM2G181151
GRMZM2G337581	Zm00001d002340	GRMZM2G045331
GRMZM2G035008	Zm00001d031940	GRMZM2G058402
GRMZM2G043980	Zm00001d013038	AC210013.4_FG002
GRMZM5G802793	Zm00001d046749	GRMZM2G108149
GRMZM2G449763	Zm00001d008785	GRMZM2G001721
GRMZM2G129031	Zm00001d040123	GRMZM2G075320
GRMZM2G386923	Zm00001d052113	GRMZM2G115013
GRMZM5G894031	Zm00001d008582	GRMZM2G171807
GRMZM2G034947	Zm00001d008581	GRMZM2G171807
GRMZM2G358238	Zm00001d002295	GRMZM2G094328
GRMZM2G170420	Zm00001d053070	AC196278.2_FG004
GRMZM2G396482	Zm00001d048550	GRMZM2G168281
GRMZM2G345238	Zm00001d039527	GRMZM2G308910
GRMZM5G866581	Zm00001d047464	GRMZM2G095124
GRMZM2G022383	Zm00001d038481	GRMZM2G128315
GRMZM2G145262	Zm00001d005863	GRMZM2G406493
GRMZM2G106393	Zm00001d046305	GRMZM5G812774
GRMZM2G317033	Zm00001d029847	GRMZM2G373329
GRMZM2G429982	Zm00001d033159	GRMZM5G859592
GRMZM2G145563	Zm00001d026261	GRMZM2G057567
GRMZM5G878615	Zm00001d019052	GRMZM2G001956
GRMZM5G898735	Zm00001d041715	GRMZM2G021471
AC186512.3_FG007	Zm00001d032812	GRMZM5G891371
GRMZM5G869550	Zm00001d031204	GRMZM2G093755
AC198324.3_FG003	Zm00001d009117	GRMZM2G009894
GRMZM2G152689	Zm00001d039675	GRMZM2G066362
GRMZM5G819035	Zm00001d033483	GRMZM2G169372
GRMZM2G106680	Zm00001d014280	GRMZM2G086202
GRMZM2G038028	Zm00001d020175	GRMZM2G053781
GRMZM2G520903	Zm00001d053306	GRMZM2G142379
GRMZM2G429759	Zm00001d018365	GRMZM2G420432
GRMZM2G417004	Zm00001d020984	GRMZM2G052266
GRMZM2G456423	Zm00001d001788	GRMZM2G058948
GRMZM2G065480	Zm00001d048731	GRMZM2G037472
GRMZM5G835747	Zm00001d047822	AC202144.5_FG001
GRMZM2G063163	Zm00001d043870	GRMZM2G423202
GRMZM2G119941	Zm00001d019629	GRMZM2G054803
GRMZM5G889776	Zm00001d037009	GRMZM2G348846
GRMZM2G137498	Zm00001d028187	GRMZM2G107815
GRMZM2G150928	Zm00001d016277	GRMZM2G121309
GRMZM2G415007	Zm00001d029699	GRMZM2G025190
GRMZM2G050371	Zm00001d008500	GRMZM2G094050
GRMZM2G304965	Zm00001d054032	GRMZM2G417859
GRMZM2G101675	Zm00001d020602	GRMZM2G446625
GRMZM2G141978	Zm00001d020603	GRMZM2G446625
GRMZM2G099669	Zm00001d049987	GRMZM2G425999
GRMZM2G548817	Zm00001d033906	GRMZM2G108115
GRMZM2G106798	Zm00001d011133	GRMZM2G137802
GRMZM2G107463	Zm00001d042506	GRMZM2G044055
GRMZM2G440363	Zm00001d006578	GRMZM2G142932
GRMZM2G081668	Zm00001d044497	GRMZM2G090647
GRMZM2G543920	Zm00001d007080	GRMZM2G166994
GRMZM2G097662	Zm00001d024493	GRMZM2G106974
GRMZM2G094535	Zm00001d036788	GRMZM2G073223
GRMZM5G891371	Zm00001d023320	GRMZM5G879178
GRMZM2G590027	Zm00001d022518	GRMZM2G181607
GRMZM5G832452	Zm00001d024943	GRMZM2G407650
GRMZM2G134711	Zm00001d036006	GRMZM2G122013
GRMZM2G338696	Zm00001d029974	GRMZM2G481163
GRMZM5G800925	Zm00001d005782	GRMZM2G341499
GRMZM2G071319	Zm00001d008922	GRMZM2G167718
GRMZM2G042195	Zm00001d019577	GRMZM5G885473
GRMZM2G011269	Zm00001d004154	GRMZM2G154811
GRMZM2G017603	Zm00001d008545	GRMZM2G081892
GRMZM2G029455	Zm00001d008546	GRMZM2G081892
GRMZM2G031572	Zm00001d004366	GRMZM2G334336
GRMZM5G872399	Zm00001d043058	GRMZM2G145753
GRMZM2G135730	Zm00001d014361	GRMZM2G007185
AC205725.3_FG010	Zm00001d021247	GRMZM2G052483
GRMZM5G860469	Zm00001d030555	GRMZM2G303909
GRMZM2G039954	Zm00001d045537	GRMZM2G042323
GRMZM2G023387	Zm00001d005546	GRMZM2G106213
AC212898.2_FG006	Zm00001d042695	GRMZM2G110922
GRMZM2G133629	Zm00001d034534	GRMZM2G081943
GRMZM2G033829	Zm00001d037681	GRMZM2G001508
GRMZM2G050875	Zm00001d051695	GRMZM2G124684
AC152495.1_FG012	Zm00001d028775	GRMZM2G307992
GRMZM5G873870	Zm00001d028776	GRMZM2G307992
GRMZM5G858609	Zm00001d029209	GRMZM5G831486
GRMZM2G066189	Zm00001d033382	GRMZM2G163807
GRMZM2G355679	Zm00001d037271	GRMZM2G107092
GRMZM2G028796	Zm00001d030391	GRMZM2G397391
AC190792.2_FG006	Zm00001d012994	GRMZM2G108694
GRMZM2G303993	Zm00001d012995	GRMZM2G108694
GRMZM2G455171	Zm00001d002243	GRMZM2G012088
GRMZM2G462537	Zm00001d011958	GRMZM2G105005
GRMZM2G174246	Zm00001d047239	GRMZM2G150213
GRMZM2G351484	Zm00001d035748	GRMZM2G456423
GRMZM2G010490	Zm00001d027506	GRMZM2G020548
GRMZM2G008864	Zm00001d045188	GRMZM5G810393
GRMZM2G329040	Zm00001d036513	GRMZM5G876960
GRMZM2G343445	Zm00001d013469	GRMZM2G157147
GRMZM2G135002	Zm00001d025973	GRMZM2G048567
GRMZM5G842508	Zm00001d043390	GRMZM2G446220
GRMZM5G872443	Zm00001d035862	GRMZM2G134214
GRMZM2G058261	Zm00001d015401	GRMZM2G180211
GRMZM2G328893	Zm00001d051404	GRMZM2G093316
GRMZM2G330455	Zm00001d023617	GRMZM2G094375
GRMZM2G061742	Zm00001d037780	GRMZM2G362557
GRMZM5G817046	Zm00001d017836	GRMZM2G180922
GRMZM2G009442	Zm00001d051286	GRMZM2G398755
GRMZM2G050625	Zm00001d001941	GRMZM2G119941
GRMZM5G893216	Zm00001d043773	GRMZM2G055450
GRMZM2G035092	Zm00001d006428	GRMZM2G181158
GRMZM2G427090	Zm00001d037300	GRMZM2G324375
GRMZM2G415491	Zm00001d025396	GRMZM2G135378
GRMZM5G827257	Zm00001d018687	GRMZM2G101527
GRMZM2G345687	Zm00001d020643	GRMZM2G126290
GRMZM2G149038	Zm00001d017788	GRMZM2G140694
GRMZM2G128160	Zm00001d053628	GRMZM5G876003
GRMZM2G434557	Zm00001d026066	GRMZM2G305146
GRMZM2G324669	Zm00001d044171	GRMZM2G105140
GRMZM2G369481	Zm00001d039276	GRMZM2G309063
GRMZM2G406493	Zm00001d050106	GRMZM2G075775
GRMZM2G036007	Zm00001d018072	GRMZM2G012269
GRMZM2G071206	Zm00001d052929	GRMZM2G119791
GRMZM2G418119	Zm00001d029860	GRMZM2G107741
GRMZM2G036605	Zm00001d033657	GRMZM2G400092
GRMZM2G057023	Zm00001d046047	GRMZM2G025480
GRMZM2G704347	Zm00001d042286	AC203535.4_FG006
GRMZM2G175799	Zm00001d021695	GRMZM2G431039
GRMZM2G137413	Zm00001d038409	GRMZM2G088409
GRMZM2G115834	Zm00001d047034	GRMZM2G131667
GRMZM2G702026	Zm00001d023535	GRMZM2G544539
GRMZM5G839757	Zm00001d033488	GRMZM2G436429
GRMZM2G380197	Zm00001d028782	GRMZM2G058138
GRMZM2G061791	Zm00001d049939	GRMZM2G085000
GRMZM5G846343	Zm00001d020929	GRMZM2G137211
AC203394.3_FG004	Zm00001d052244	GRMZM2G040548
GRMZM2G040069	Zm00001d028207	GRMZM2G069458
GRMZM5G886006	Zm00001d018963	GRMZM2G030263
GRMZM2G304657	Zm00001d021762	GRMZM2G036007
GRMZM2G464263	Zm00001d052675	GRMZM2G009510
GRMZM2G040600	Zm00001d028467	GRMZM2G474407
GRMZM5G837872	Zm00001d037601	GRMZM5G899390
GRMZM2G129288	Zm00001d031942	GRMZM2G167836
GRMZM2G033592	Zm00001d047989	GRMZM2G177984
GRMZM2G053914	Zm00001d045002	GRMZM2G087196
GRMZM2G039443	Zm00001d014789	AC190922.3_FG007
GRMZM2G353114	Zm00001d022578	GRMZM2G134480
GRMZM2G523621	Zm00001d039407	GRMZM2G045330
GRMZM2G008556	Zm00001d016662	GRMZM2G062848
GRMZM2G505380	Zm00001d042750	GRMZM2G074236
GRMZM2G010056	Zm00001d036122	GRMZM2G447347
GRMZM2G062495	Zm00001d043789	GRMZM2G146913
GRMZM2G009510	Zm00001d047437	GRMZM2G147373
GRMZM2G019738	Zm00001d053160	GRMZM2G173257
GRMZM5G829831	Zm00001d028056	GRMZM2G004523
AC205982.3_FG014	Zm00001d010892	GRMZM5G876434
GRMZM2G131055	Zm00001d007977	GRMZM2G479717
GRMZM2G047919	Zm00001d021761	GRMZM2G031323
GRMZM2G050842	Zm00001d031127	AC203989.4_FG001
GRMZM5G871297	Zm00001d024042	GRMZM2G465257
GRMZM2G121354	Zm00001d038721	AC205982.3_FG014
GRMZM2G106303	Zm00001d017067	GRMZM2G057184
GRMZM2G061545	Zm00001d033983	GRMZM2G169671
GRMZM2G108570	Zm00001d045482	GRMZM2G122135
GRMZM2G040881	Zm00001d042654	GRMZM2G038281
GRMZM2G126048	Zm00001d045370	GRMZM2G076972
GRMZM2G073731	Zm00001d044954	GRMZM2G066358
GRMZM2G053311	Zm00001d019320	GRMZM5G898371
GRMZM2G135120	Zm00001d049018	GRMZM2G017804
GRMZM2G049168	Zm00001d039414	GRMZM2G035278
GRMZM2G030106	Zm00001d031526	GRMZM2G166407
GRMZM2G425999	Zm00001d037369	GRMZM2G018823
GRMZM2G301172	Zm00001d004881	GRMZM2G032478
GRMZM2G135396	Zm00001d029833	GRMZM6G178175
GRMZM2G047788	Zm00001d048487	GRMZM2G116803
GRMZM2G059445	Zm00001d002250	GRMZM2G302701
GRMZM2G338205	Zm00001d002251	GRMZM2G302701
GRMZM5G810054	Zm00001d016365	GRMZM2G015132
GRMZM5G856738	Zm00001d053118	GRMZM5G889769
GRMZM2G078412	Zm00001d033718	GRMZM2G100650
GRMZM2G131715	Zm00001d020488	GRMZM2G475148
GRMZM2G170586	Zm00001d011288	GRMZM2G057618
GRMZM2G052423	Zm00001d033213	GRMZM2G324276
GRMZM2G396477	Zm00001d046593	AC211394.4_FG004
GRMZM2G429231	Zm00001d017381	GRMZM2G170017
GRMZM2G083732	Zm00001d006269	GRMZM2G158679
GRMZM2G077068	Zm00001d021339	GRMZM2G148892
GRMZM2G122013	Zm00001d037632	GRMZM2G323888
GRMZM2G169013	Zm00001d041889	GRMZM2G115812
GRMZM2G160927	Zm00001d034004	GRMZM2G173852
AC199571.3_FG004	Zm00001d030969	GRMZM2G130374
GRMZM2G417008	Zm00001d023242	GRMZM2G129954
GRMZM2G153152	Zm00001d013217	GRMZM2G141903
GRMZM5G886177	Zm00001d002362	GRMZM2G068982
GRMZM2G398755	Zm00001d049683	GRMZM2G112792
GRMZM2G036206	Zm00001d047969	GRMZM2G165426
GRMZM2G052279	Zm00001d049000	GRMZM2G068330
GRMZM5G849243	Zm00001d011638	GRMZM2G077187
GRMZM2G136268	Zm00001d007477	GRMZM2G159756
GRMZM2G125138	Zm00001d029617	GRMZM2G024175
GRMZM2G458974	Zm00001d007585	GRMZM5G885445
GRMZM2G091845	Zm00001d017871	GRMZM2G176270
GRMZM2G533147	Zm00001d017287	GRMZM2G468585
GRMZM5G872618	Zm00001d046690	GRMZM2G121621
GRMZM2G097848	Zm00001d049288	GRMZM2G161521
GRMZM2G129071	Zm00001d018037	GRMZM2G028325
GRMZM2G085941	Zm00001d015867	GRMZM2G082504
GRMZM2G000481	Zm00001d012808	AC220970.4_FG002
GRMZM2G067929	Zm00001d036263	GRMZM2G306282
AC234528.1_FG001	Zm00001d039094	GRMZM2G156620
GRMZM2G396357	Zm00001d041842	GRMZM2G031167
GRMZM2G138496	Zm00001d025106	GRMZM2G081585
GRMZM2G700148	Zm00001d027948	GRMZM2G114918
GRMZM5G881180	Zm00001d009969	GRMZM2G176056
GRMZM2G081689	Zm00001d051961	GRMZM2G140524
GRMZM2G105368	Zm00001d051617	GRMZM2G179651
GRMZM2G052875	Zm00001d003112	GRMZM2G366150
GRMZM2G327174	Zm00001d033489	GRMZM2G038677
GRMZM2G362557	Zm00001d006221	GRMZM2G002807
GRMZM2G149700	Zm00001d025980	GRMZM2G404367
GRMZM2G003108	Zm00001d053748	GRMZM2G133653
AC213463.3_FG007	Zm00001d028434	GRMZM2G171736
GRMZM2G083580	Zm00001d012527	GRMZM2G068973
GRMZM2G702923	Zm00001d022360	GRMZM2G083580
GRMZM5G814314	Zm00001d018906	GRMZM2G107408
GRMZM5G859592	Zm00001d013367	GRMZM2G152466
GRMZM2G068059	Zm00001d053514	GRMZM2G007795
GRMZM2G086486	Zm00001d038747	GRMZM2G105473
GRMZM2G002483	Zm00001d014596	GRMZM2G048904
GRMZM2G129209	Zm00001d053696	GRMZM2G105631
GRMZM2G037048	Zm00001d034918	GRMZM2G135199
GRMZM6G412501	Zm00001d016933	GRMZM2G056505
GRMZM2G050821	Zm00001d007616	GRMZM2G091956
AC155622.2_FG004	Zm00001d023498	GRMZM2G156506
GRMZM2G042133	Zm00001d037334	GRMZM2G048910
GRMZM2G048010	Zm00001d036098	GRMZM2G177726
GRMZM2G062245	Zm00001d047553	GRMZM5G899188
GRMZM2G036543	Zm00001d025644	GRMZM2G064159
GRMZM2G066256	Zm00001d002250	GRMZM2G443445
GRMZM2G130010	Zm00001d029241	GRMZM5G822100
GRMZM2G164672	Zm00001d004716	GRMZM2G046498
GRMZM2G088375	Zm00001d043492	GRMZM2G176699
GRMZM2G180716	Zm00001d043855	GRMZM2G077607
GRMZM2G141136	Zm00001d039064	AC188023.3_FG005
GRMZM2G107417	Zm00001d016182	GRMZM2G405581
GRMZM2G035790	Zm00001d045884	GRMZM2G420988
GRMZM2G138398	Zm00001d041953	GRMZM2G459642
GRMZM2G029356	Zm00001d010029	GRMZM2G088761
GRMZM2G029243	Zm00001d037394	GRMZM2G427805
GRMZM2G052268	Zm00001d010790	GRMZM2G173700
GRMZM2G151285	Zm00001d047986	GRMZM5G865112
GRMZM2G165644	Zm00001d011997	GRMZM2G064905
GRMZM2G181354	Zm00001d024143	GRMZM2G146981
AC203966.5_FG002	Zm00001d046811	GRMZM2G086773
GRMZM2G351330	Zm00001d038554	GRMZM2G140805
GRMZM5G887303	Zm00001d034722	GRMZM5G860632
GRMZM2G406074	Zm00001d008577	GRMZM2G333635
GRMZM2G510127	Zm00001d012881	GRMZM2G448001
GRMZM2G131723	Zm00001d028999	GRMZM2G011598
GRMZM2G021459	Zm00001d038911	GRMZM2G004909
GRMZM2G088291	Zm00001d008962	GRMZM2G092981
GRMZM2G028902	Zm00001d047989	GRMZM2G097812
GRMZM5G886561	Zm00001d043839	GRMZM5G863146
GRMZM2G093451	Zm00001d027937	GRMZM2G410623
GRMZM2G045178	Zm00001d039010	GRMZM2G021794
GRMZM2G370915	Zm00001d005867	GRMZM2G376548
GRMZM2G067530	Zm00001d014159	GRMZM2G012030
GRMZM2G420012	Zm00001d036409	GRMZM2G009080
GRMZM2G143590	Zm00001d032691	GRMZM2G085974
GRMZM2G070432	Zm00001d038319	GRMZM2G048150
GRMZM5G899476	Zm00001d019354	GRMZM2G382273
GRMZM2G466265	Zm00001d014405	GRMZM2G063522
GRMZM2G115372	Zm00001d049642	GRMZM2G049127
GRMZM2G340319	Zm00001d008393	GRMZM2G305080
GRMZM2G171595	Zm00001d014568	GRMZM2G367857
GRMZM2G426154	Zm00001d028761	GRMZM5G850640
GRMZM2G054998	Zm00001d006159	GRMZM2G164963
GRMZM2G073219	Zm00001d028690	GRMZM5G873286
AC209257.4_FG003	Zm00001d054104	GRMZM2G315594
GRMZM2G160452	Zm00001d007597	GRMZM2G105570
GRMZM2G046498	Zm00001d053416	GRMZM2G153602
GRMZM2G004523	Zm00001d038521	GRMZM2G129064
GRMZM2G079754	Zm00001d045527	GRMZM2G083711
GRMZM2G108739	Zm00001d025431	GRMZM2G072513
GRMZM2G043976	Zm00001d049914	GRMZM2G177052
GRMZM5G814271	Zm00001d051966	GRMZM2G027302
GRMZM2G037472	Zm00001d031303	GRMZM2G050177
GRMZM2G179638	Zm00001d039922	GRMZM2G094028
GRMZM2G411888	Zm00001d039921	GRMZM2G094028
GRMZM5G848503	Zm00001d044620	GRMZM2G166671
GRMZM2G117482	Zm00001d042033	GRMZM2G016382
GRMZM2G367001	Zm00001d038164	GRMZM5G841343
AC199068.2_FG017	Zm00001d013517	AC213463.3_FG007
GRMZM2G306216	Zm00001d015578	GRMZM2G148052
GRMZM2G479112	Zm00001d018683	GRMZM2G045031
GRMZM2G426200	Zm00001d026505	GRMZM2G428119
GRMZM2G053801	Zm00001d004525	GRMZM2G076394
GRMZM2G307992	Zm00001d045338	GRMZM2G005522
GRMZM2G039583	Zm00001d042142	GRMZM2G366607
GRMZM5G800975	Zm00001d048085	AC197717.3_FG002
GRMZM2G022506	Zm00001d051016	GRMZM2G138632
GRMZM2G119081	Zm00001d045445	GRMZM2G097313
GRMZM5G880508	Zm00001d032166	GRMZM2G160927
GRMZM2G302405	Zm00001d027676	GRMZM2G043799
GRMZM2G330650	Zm00001d026258	GRMZM2G128934
GRMZM2G083555	Zm00001d006553	GRMZM2G046474
GRMZM2G429057	Zm00001d018627	GRMZM2G135739
GRMZM5G850015	Zm00001d042362	GRMZM2G447447
GRMZM2G401979	Zm00001d006029	GRMZM2G003947
GRMZM2G155387	Zm00001d016401	GRMZM2G366910
GRMZM2G181607	Zm00001d004051	GRMZM2G334680
GRMZM5G884229	Zm00001d053202	GRMZM2G104783
GRMZM2G131245	Zm00001d042267	GRMZM2G338259
GRMZM5G888620	Zm00001d029059	GRMZM2G119850
GRMZM2G065596	Zm00001d002933	AC212859.3_FG007
GRMZM2G176495	Zm00001d027879	GRMZM2G012102
GRMZM2G052442	Zm00001d043305	GRMZM5G838938
GRMZM2G125193	Zm00001d028699	GRMZM2G154883
GRMZM2G311165	Zm00001d045147	GRMZM2G000371
GRMZM5G869532	Zm00001d052136	GRMZM2G126732
GRMZM2G060589	Zm00001d002178	GRMZM2G175258
GRMZM2G028885	Zm00001d001803	GRMZM2G051917
GRMZM2G020295	Zm00001d049019	GRMZM2G017624
GRMZM2G016382	Zm00001d021520	GRMZM2G088590
GRMZM2G146173	Zm00001d007434	GRMZM2G023328
GRMZM2G048553	Zm00001d005652	GRMZM5G869532
GRMZM2G059033	Zm00001d028888	GRMZM2G030036
GRMZM2G047219	Zm00001d019089	GRMZM2G156684
GRMZM2G078465	Zm00001d001923	GRMZM2G702889
GRMZM2G156684	Zm00001d018297	GRMZM2G098058
GRMZM5G862101	Zm00001d053076	GRMZM2G106119
GRMZM2G042548	Zm00001d042487	GRMZM2G176542
GRMZM5G893931	Zm00001d035056	GRMZM2G015708
GRMZM5G839014	Zm00001d032703	GRMZM2G107629
GRMZM2G127429	Zm00001d034501	GRMZM2G137321
GRMZM2G332548	Zm00001d027677	GRMZM2G329159
GRMZM2G019084	Zm00001d004435	GRMZM2G401979
GRMZM2G064202	Zm00001d038082	GRMZM2G055020
GRMZM2G127714	Zm00001d016557	GRMZM2G474531
GRMZM2G138870	Zm00001d001820	GRMZM2G084958
GRMZM2G164963	Zm00001d020799	GRMZM2G150796
GRMZM2G010298	Zm00001d029247	GRMZM2G140989
GRMZM2G123257	Zm00001d037721	GRMZM2G051474
GRMZM2G339091	Zm00001d021469	GRMZM2G423555
GRMZM2G425377	Zm00001d002184	GRMZM2G164400
GRMZM5G892094	Zm00001d012238	GRMZM2G005236
GRMZM5G827440	Zm00001d023331	GRMZM2G304965
GRMZM5G879280	Zm00001d021324	GRMZM2G125448
GRMZM2G140524	Zm00001d035080	GRMZM2G476040
GRMZM2G104575	Zm00001d015856	GRMZM2G063851
GRMZM2G463267	Zm00001d011069	GRMZM2G047219
GRMZM2G009894	Zm00001d005936	GRMZM2G015753
GRMZM2G108600	Zm00001d016698	GRMZM2G115480
GRMZM2G121374	Zm00001d027844	GRMZM5G857303
GRMZM2G124045	Zm00001d017491	GRMZM2G119485
GRMZM2G030128	Zm00001d034935	GRMZM2G077222
GRMZM5G866269	Zm00001d005403	GRMZM2G504906
GRMZM2G165613	Zm00001d012511	AC218972.3_FG001
GRMZM2G113250	Zm00001d036749	GRMZM2G471083
GRMZM2G140223	Zm00001d017505	GRMZM2G329454
GRMZM2G083186	Zm00001d002334	GRMZM2G306374
GRMZM2G169316	Zm00001d014852	GRMZM2G037284
AC234161.1_FG010	Zm00001d053960	GRMZM2G010044
GRMZM5G842855	Zm00001d017387	GRMZM2G066885
GRMZM2G141605	Zm00001d022017	GRMZM2G053338
GRMZM2G105755	Zm00001d036715	GRMZM2G170281
GRMZM2G703783	Zm00001d013725	GRMZM2G060940
GRMZM2G124797	Zm00001d023905	GRMZM2G458581
GRMZM2G051311	Zm00001d045516	GRMZM2G071491
GRMZM5G830403	Zm00001d017480	GRMZM5G816314
GRMZM2G028700	Zm00001d034894	GRMZM2G137968
GRMZM2G031827	Zm00001d034578	GRMZM2G072671
GRMZM2G157300	Zm00001d045320	GRMZM2G098721
GRMZM6G616789	Zm00001d023368	GRMZM5G835772
GRMZM2G091487	Zm00001d002799	GRMZM2G351330
GRMZM2G043498	Zm00001d042934	GRMZM5G804618
GRMZM5G899119	Zm00001d027338	GRMZM2G393062
GRMZM2G436332	Zm00001d013743	GRMZM2G400281
GRMZM2G043530	Zm00001d042807	GRMZM2G111907
GRMZM2G158586	Zm00001d031279	GRMZM2G176962
GRMZM2G396246	Zm00001d051595	GRMZM2G156068
GRMZM2G102903	Zm00001d025437	GRMZM2G136508
GRMZM2G110277	Zm00001d010702	GRMZM2G082894
GRMZM2G021661	Zm00001d006947	GRMZM2G075244
GRMZM2G059037	Zm00001d013173	GRMZM2G091487
GRMZM5G884151	Zm00001d047479	GRMZM2G058522
GRMZM2G065176	Zm00001d053327	GRMZM2G118312
GRMZM2G309899	Zm00001d024751	AC205413.4_FG003
GRMZM2G180926	Zm00001d015877	AC212351.4_FG001
GRMZM2G017186	Zm00001d006472	GRMZM2G336962
GRMZM2G152179	Zm00001d030165	GRMZM2G143625
GRMZM2G131020	Zm00001d029531	GRMZM2G065215
GRMZM2G164945	Zm00001d021993	GRMZM2G089630
GRMZM2G088409	Zm00001d048734	GRMZM2G339848
GRMZM2G027075	Zm00001d018937	AC214119.3_FG009
GRMZM5G813886	Zm00001d048244	GRMZM2G028794
AC197432.4_FG001	Zm00001d028511	GRMZM2G408305
GRMZM2G075461	Zm00001d020629	GRMZM2G172320
GRMZM2G337425	Zm00001d037066	GRMZM2G442215
GRMZM2G132301	Zm00001d028457	GRMZM2G060138
GRMZM5G889052	Zm00001d024745	GRMZM2G022740
AC213463.3_FG004	Zm00001d004737	GRMZM2G335126
GRMZM2G457909	Zm00001d044364	GRMZM2G135120
GRMZM2G095631	Zm00001d019947	GRMZM2G135256
GRMZM2G071162	Zm00001d005378	GRMZM2G042677
GRMZM2G332801	Zm00001d028974	GRMZM2G033570
GRMZM2G025671	Zm00001d011601	AC202181.3_FG010
GRMZM2G088590	Zm00001d038920	GRMZM2G025518
GRMZM2G418289	Zm00001d007258	GRMZM2G067915
GRMZM2G079066	Zm00001d032932	GRMZM2G070673
GRMZM2G015267	Zm00001d027307	GRMZM2G329177
GRMZM2G071468	Zm00001d034944	GRMZM2G115190
GRMZM5G802395	Zm00001d042810	GRMZM2G047851
GRMZM2G338884	Zm00001d035916	GRMZM2G141009
GRMZM2G120421	Zm00001d042285	AC215201.3_FG003
GRMZM2G144420	Zm00001d043338	GRMZM2G152451
GRMZM2G029833	Zm00001d036483	GRMZM2G114394
GRMZM2G103182	Zm00001d008462	GRMZM2G113421
GRMZM2G057184	Zm00001d013550	GRMZM2G129140
GRMZM2G348480	Zm00001d047615	GRMZM2G066784
GRMZM2G011404	Zm00001d032361	GRMZM2G327174
GRMZM2G114793	Zm00001d011879	GRMZM2G129019
GRMZM2G087165	Zm00001d047834	GRMZM2G164136
GRMZM2G174114	Zm00001d029647	GRMZM2G396640
GRMZM2G101181	Zm00001d029646	GRMZM2G396640
AC212859.3_FG007	Zm00001d036215	GRMZM2G002100
GRMZM2G100976	Zm00001d039058	GRMZM2G348890
AC197056.3_FG002	Zm00001d053139	GRMZM2G014409
GRMZM2G133028	Zm00001d042892	GRMZM2G074908
AC207260.3_FG003	Zm00001d041684	GRMZM2G302279
GRMZM2G105770	Zm00001d046579	GRMZM2G042231
GRMZM2G068176	Zm00001d012838	GRMZM2G033117
GRMZM2G077718	Zm00001d032342	GRMZM2G154114
GRMZM5G840762	Zm00001d026360	GRMZM2G148621
AC202144.5_FG001	Zm00001d002154	GRMZM2G106105
GRMZM5G862945	Zm00001d001999	GRMZM2G039588
GRMZM2G033117	Zm00001d023720	GRMZM2G091891
GRMZM2G033626	Zm00001d024268	GRMZM2G167018
GRMZM2G106017	Zm00001d042372	GRMZM2G153991
GRMZM2G029039	Zm00001d053401	GRMZM2G148118
GRMZM2G457267	Zm00001d009774	GRMZM2G125893
GRMZM2G166994	Zm00001d038678	GRMZM2G371313
GRMZM2G082174	Zm00001d039880	GRMZM2G034534
GRMZM2G115047	Zm00001d036873	AC226723.2_FG001
GRMZM2G166348	Zm00001d005470	GRMZM2G357112
GRMZM2G038485	Zm00001d043293	GRMZM5G817173
GRMZM2G403915	Zm00001d032939	GRMZM2G040387
GRMZM2G144028	Zm00001d008214	GRMZM2G140994
GRMZM2G058655	Zm00001d041679	GRMZM2G063949
GRMZM2G041994	Zm00001d052788	GRMZM2G124053
GRMZM2G371313	Zm00001d025905	GRMZM2G132301
GRMZM2G002165	Zm00001d047986	GRMZM2G103119
GRMZM2G156422	Zm00001d011122	GRMZM6G942746
GRMZM2G444378	Zm00001d018150	GRMZM2G163776
GRMZM2G084274	Zm00001d047468	GRMZM2G448687
GRMZM2G009166	Zm00001d029619	AC199541.4_FG007
AC202110.3_FG004	Zm00001d010131	GRMZM2G027960
AF546187.1_FG009	Zm00001d024467	GRMZM2G022506
GRMZM2G017868	Zm00001d039684	GRMZM2G150928
AC195172.3_FG001	Zm00001d043578	GRMZM2G013555
GRMZM2G074351	Zm00001d049652	GRMZM2G008273
AC190526.3_FG004	Zm00001d043651	GRMZM2G181135
GRMZM2G155096	Zm00001d013847	GRMZM2G059013
GRMZM5G853361	Zm00001d010056	GRMZM2G375504
GRMZM2G027059	Zm00001d018798	GRMZM2G013114
GRMZM2G073630	Zm00001d009488	GRMZM2G021331
GRMZM2G008578	Zm00001d038808	GRMZM2G587327
GRMZM2G008359	Zm00001d029397	GRMZM2G179792
GRMZM2G029396	Zm00001d053359	GRMZM5G800286
GRMZM5G821027	Zm00001d010232	GRMZM2G152862
GRMZM2G181236	Zm00001d040100	GRMZM2G177991
GRMZM2G569855	Zm00001d044655	GRMZM2G439784
GRMZM2G452954	Zm00001d036364	GRMZM2G074358
GRMZM2G010892	Zm00001d023234	GRMZM2G337929
GRMZM2G166407	Zm00001d021949	GRMZM2G023346
GRMZM2G158162	Zm00001d012774	GRMZM5G812548
GRMZM2G359314	Zm00001d028653	GRMZM2G044027
GRMZM2G110287	Zm00001d047738	GRMZM2G059565
GRMZM2G116803	Zm00001d034480	GRMZM2G163912
GRMZM5G826577	Zm00001d041105	GRMZM2G411536
GRMZM2G000292	Zm00001d038012	GRMZM2G173563
GRMZM2G107437	Zm00001d013829	GRMZM5G871425
GRMZM2G070708	Zm00001d022092	GRMZM2G152179
GRMZM2G367023	Zm00001d022361	GRMZM2G083555
GRMZM2G410865	Zm00001d052886	GRMZM5G877077
GRMZM2G173858	Zm00001d046675	GRMZM2G317801
GRMZM2G127690	Zm00001d019334	GRMZM2G082830
GRMZM2G356529	Zm00001d029272	GRMZM2G040515
GRMZM2G568979	Zm00001d042608	GRMZM2G376085
GRMZM2G119745	Zm00001d049926	GRMZM2G002704
GRMZM2G407760	Zm00001d047138	GRMZM2G094828
GRMZM2G105855	Zm00001d032669	GRMZM2G131683
GRMZM2G082964	Zm00001d037174	GRMZM2G137593
GRMZM2G118403	Zm00001d028422	GRMZM2G019689
AC188023.3_FG005	Zm00001d037497	GRMZM2G127115
GRMZM2G107715	Zm00001d021176	GRMZM5G827121
GRMZM2G081151	Zm00001d038299	GRMZM2G000816
GRMZM2G465764	Zm00001d024759	GRMZM2G155512
GRMZM2G058402	Zm00001d033346	GRMZM2G017047
GRMZM2G028218	Zm00001d047852	GRMZM2G083367
GRMZM2G051330	Zm00001d036812	GRMZM2G061545
GRMZM2G467756	Zm00001d042136	GRMZM2G158625
GRMZM5G848879	Zm00001d038201	GRMZM2G066029
GRMZM2G402977	Zm00001d017424	GRMZM2G072865
GRMZM2G004824	Zm00001d045398	GRMZM2G134260
GRMZM2G034727	Zm00001d008499	GRMZM2G140782
AC233910.1_FG002	Zm00001d008606	GRMZM2G168393
GRMZM2G171650	Zm00001d006911	GRMZM2G328593
GRMZM2G139840	Zm00001d048593	GRMZM2G162200
GRMZM2G130943	Zm00001d015698	GRMZM2G102189
GRMZM2G356839	Zm00001d039417	GRMZM2G035008
GRMZM2G023328	Zm00001d011999	GRMZM2G364863
GRMZM2G036186	Zm00001d018853	GRMZM2G006716
GRMZM2G050701	Zm00001d042768	GRMZM5G837822
GRMZM2G383122	Zm00001d014123	GRMZM2G134947
GRMZM2G342226	Zm00001d032096	GRMZM2G110306
GRMZM2G033236	Zm00001d036617	GRMZM5G816289
GRMZM2G143714	Zm00001d013264	GRMZM2G432176
GRMZM5G873675	Zm00001d006875	GRMZM2G124963
GRMZM2G154664	Zm00001d005940	GRMZM2G015409
GRMZM2G410782	Zm00001d017713	GRMZM2G076313
GRMZM2G701564	Zm00001d013960	GRMZM2G177314
GRMZM2G472991	Zm00001d044267	GRMZM5G848696
GRMZM2G089696	Zm00001d033969	GRMZM2G159295
GRMZM2G010105	Zm00001d012862	GRMZM2G399750
GRMZM2G087875	Zm00001d004088	GRMZM2G078116
GRMZM2G026672	Zm00001d013603	GRMZM2G094900
GRMZM2G159142	Zm00001d015986	GRMZM2G049021
GRMZM2G143535	Zm00001d013879	GRMZM2G339562
GRMZM2G087222	Zm00001d031618	GRMZM2G114816
AC149475.2_FG002	Zm00001d031494	GRMZM2G047968
GRMZM5G858165	Zm00001d018730	GRMZM2G006071
GRMZM2G081585	Zm00001d013178	GRMZM2G052467
GRMZM2G018697	Zm00001d044023	GRMZM2G033671
GRMZM2G163658	Zm00001d049073	GRMZM2G581155
GRMZM2G455243	Zm00001d035303	GRMZM2G005622
GRMZM2G082522	Zm00001d022592	GRMZM2G307437
GRMZM2G002396	Zm00001d021830	AC225308.2_FG005
GRMZM2G396640	Zm00001d049858	GRMZM5G801241
GRMZM2G356817	Zm00001d038121	GRMZM2G090905
GRMZM2G088834	Zm00001d009480	GRMZM2G040477
GRMZM2G042893	Zm00001d051998	GRMZM2G054210
GRMZM2G081935	Zm00001d031878	AC186231.4_FG002
GRMZM2G007441	Zm00001d017564	GRMZM2G106216
GRMZM6G178175	Zm00001d047681	GRMZM2G006830
GRMZM5G827611	Zm00001d052748	GRMZM2G125768
GRMZM2G078508	Zm00001d032753	GRMZM2G398198
GRMZM2G093902	Zm00001d029281	GRMZM2G330650
GRMZM2G070588	Zm00001d049053	GRMZM2G545336
GRMZM2G050561	Zm00001d043102	GRMZM2G155285
GRMZM2G359217	Zm00001d010661	GRMZM2G036980
GRMZM2G025059	Zm00001d034944	GRMZM2G115162
GRMZM5G841015	Zm00001d043510	GRMZM2G177929
GRMZM2G457193	Zm00001d025542	GRMZM2G007120
GRMZM2G122028	Zm00001d011157	GRMZM2G338161
GRMZM5G820374	Zm00001d030603	GRMZM2G420694
GRMZM6G577626	Zm00001d051799	GRMZM2G063276
GRMZM2G176841	Zm00001d011765	GRMZM2G176301
GRMZM2G023791	Zm00001d026696	GRMZM5G869572
GRMZM2G358059	Zm00001d033502	GRMZM2G093855
GRMZM2G399750	Zm00001d028363	GRMZM2G100714
GRMZM2G003186	Zm00001d002318	GRMZM2G007256
GRMZM5G833140	Zm00001d022043	GRMZM2G056081
GRMZM2G029249	Zm00001d012869	GRMZM2G138676
GRMZM2G177894	Zm00001d048083	GRMZM2G102218
GRMZM2G099487	Zm00001d051568	GRMZM2G176340
GRMZM2G169962	Zm00001d042619	GRMZM2G110195
GRMZM2G111713	Zm00001d046132	GRMZM2G138370
GRMZM2G007734	Zm00001d036981	GRMZM2G169114
GRMZM2G406196	Zm00001d019411	GRMZM2G438871
GRMZM2G010235	Zm00001d038051	GRMZM2G137498
GRMZM2G350800	Zm00001d028721	GRMZM2G021095
GRMZM2G017966	Zm00001d005758	GRMZM5G889643
GRMZM2G046755	Zm00001d006476	GRMZM2G171707
AC208440.3_FG003	Zm00001d039664	GRMZM2G098335
GRMZM2G104456	Zm00001d003334	GRMZM2G151418
GRMZM2G433609	Zm00001d028566	GRMZM2G306806
GRMZM5G800973	Zm00001d045384	GRMZM2G173628
GRMZM2G149323	Zm00001d012027	GRMZM2G180335
GRMZM2G152025	Zm00001d010159	GRMZM2G126010
GRMZM2G471814	Zm00001d013485	GRMZM2G102475
GRMZM2G159364	Zm00001d014063	GRMZM2G112309
GRMZM2G018027	Zm00001d051629	GRMZM2G042502
GRMZM2G122841	Zm00001d030926	AC199487.4_FG003
GRMZM2G019166	Zm00001d030915	GRMZM2G428216
GRMZM5G812289	Zm00001d010413	GRMZM2G016655
GRMZM2G439389	Zm00001d051456	GRMZM2G124566
GRMZM2G002240	Zm00001d036871	GRMZM2G157300
GRMZM2G146740	Zm00001d002332	GRMZM2G005155
GRMZM2G128219	Zm00001d022308	GRMZM2G039954
GRMZM2G452142	Zm00001d006605	GRMZM2G448715
GRMZM2G103281	Zm00001d037257	GRMZM2G009683
GRMZM2G040230	Zm00001d003626	GRMZM2G316840
GRMZM2G381782	Zm00001d006531	GRMZM2G365282
GRMZM2G129064	Zm00001d010211	GRMZM5G887068
GRMZM2G064371	Zm00001d043166	GRMZM2G004858
GRMZM2G061910	Zm00001d002424	GRMZM2G156348
GRMZM2G383154	Zm00001d002479	GRMZM2G342033
GRMZM2G524711	Zm00001d039006	GRMZM2G030710
GRMZM2G026980	Zm00001d043863	GRMZM2G092152
GRMZM2G109070	Zm00001d036946	GRMZM2G179550
GRMZM2G304010	Zm00001d029337	GRMZM2G012355
GRMZM2G025531	Zm00001d012752	GRMZM2G063737
GRMZM2G046520	Zm00001d025017	GRMZM2G177182
GRMZM2G362764	Zm00001d011275	GRMZM2G135795
GRMZM2G156785	Zm00001d002961	GRMZM2G171410
GRMZM2G041831	Zm00001d011943	GRMZM2G010202
GRMZM2G008819	Zm00001d049461	GRMZM2G460571
GRMZM2G028883	Zm00001d048886	AC212755.4_FG002
GRMZM2G118385	Zm00001d006053	GRMZM2G008374
GRMZM2G179792	Zm00001d044838	GRMZM5G862101
GRMZM2G382273	Zm00001d011369	GRMZM2G052844
GRMZM2G334680	Zm00001d045484	GRMZM2G381782
GRMZM2G015011	Zm00001d043056	GRMZM2G068151
GRMZM5G873286	Zm00001d006494	GRMZM2G169539
GRMZM2G398628	Zm00001d017150	GRMZM2G095194
GRMZM2G402862	Zm00001d011446	GRMZM2G179685
GRMZM2G404367	Zm00001d012479	GRMZM2G043498
GRMZM2G102475	Zm00001d036741	GRMZM2G013773
AC199384.3_FG002	Zm00001d036004	GRMZM2G078458
GRMZM5G835213	Zm00001d032375	GRMZM5G894200
GRMZM5G808876	Zm00001d039667	GRMZM2G054387
GRMZM2G090627	Zm00001d009873	AC199363.4_FG003
GRMZM2G400092	Zm00001d004993	GRMZM2G074351
GRMZM2G020146	Zm00001d035057	GRMZM2G015793
GRMZM2G305809	Zm00001d040651	GRMZM2G169382
GRMZM5G854511	Zm00001d025864	AC206901.3_FG005
GRMZM2G410704	Zm00001d039644	GRMZM2G338465
GRMZM2G080516	Zm00001d010207	GRMZM2G450537
GRMZM2G055899	Zm00001d035381	GRMZM2G451679
GRMZM2G068352	Zm00001d002262	GRMZM2G148998
GRMZM2G104291	Zm00001d045379	GRMZM2G000645
AC206780.3_FG004	Zm00001d009820	GRMZM2G509876
GRMZM5G883813	Zm00001d028879	GRMZM2G038015
GRMZM2G147534	Zm00001d020703	GRMZM2G009166
GRMZM5G817173	Zm00001d004154	GRMZM2G455115
GRMZM2G022019	Zm00001d043152	GRMZM2G020002
GRMZM2G032419	Zm00001d017530	GRMZM2G061910
GRMZM2G090647	Zm00001d007038	GRMZM2G008623
GRMZM2G397391	Zm00001d017849	GRMZM2G459110
GRMZM2G117298	Zm00001d036531	GRMZM2G018946
AC204381.3_FG001	Zm00001d025842	GRMZM2G352023
GRMZM2G137321	Zm00001d049616	GRMZM2G131378
GRMZM2G078090	Zm00001d016490	GRMZM2G078272
GRMZM2G436583	Zm00001d026398	GRMZM2G445575
GRMZM2G397261	Zm00001d009372	GRMZM2G168502
GRMZM2G003970	Zm00001d037449	GRMZM2G143525
GRMZM2G159950	Zm00001d023957	GRMZM2G117028
GRMZM2G364977	Zm00001d018460	GRMZM2G079013
GRMZM2G163136	Zm00001d001916	GRMZM2G043992
GRMZM2G141723	Zm00001d008190	GRMZM2G092694
GRMZM2G089630	Zm00001d003606	GRMZM2G146694
GRMZM2G129232	Zm00001d007401	GRMZM2G056088
GRMZM2G363982	Zm00001d026657	GRMZM2G177340
GRMZM2G058612	Zm00001d037858	GRMZM5G878070
GRMZM2G018004	Zm00001d052768	GRMZM2G163671
GRMZM2G042615	Zm00001d021727	GRMZM2G465987
GRMZM2G165695	Zm00001d053378	GRMZM2G054233
GRMZM2G092154	Zm00001d014382	GRMZM2G126161
GRMZM2G018059	Zm00001d036137	GRMZM2G007489
GRMZM2G088218	Zm00001d009328	GRMZM2G131055
GRMZM2G319573	Zm00001d049579	GRMZM2G000481
GRMZM2G011858	Zm00001d007559	GRMZM2G416498
GRMZM2G151674	Zm00001d023560	GRMZM2G347226
GRMZM2G177182	Zm00001d028753	AC208201.3_FG001
GRMZM2G417866	Zm00001d006438	GRMZM2G163444
GRMZM2G054109	Zm00001d001884	GRMZM2G078541
GRMZM2G138421	Zm00001d020638	GRMZM2G388045
GRMZM2G528319	Zm00001d008509	GRMZM2G569903
GRMZM2G143525	Zm00001d005507	GRMZM2G446872
GRMZM2G009530	Zm00001d002434	GRMZM2G074743
GRMZM2G082874	Zm00001d025234	GRMZM2G130351
GRMZM2G064050	Zm00001d039089	GRMZM2G154595
AC230011.2_FG002	Zm00001d002474	GRMZM2G035685
GRMZM2G064759	Zm00001d048509	GRMZM2G092776
GRMZM2G162968	Zm00001d017429	GRMZM2G156599
GRMZM2G044495	Zm00001d016651	GRMZM2G044788
GRMZM2G147910	Zm00001d018468	GRMZM5G824600
GRMZM2G134227	Zm00001d041794	GRMZM2G338160
GRMZM2G062357	Zm00001d019597	GRMZM2G396540
GRMZM2G127984	Zm00001d025670	GRMZM2G038934
GRMZM5G814279	Zm00001d039541	GRMZM2G051458
GRMZM5G808737	Zm00001d006167	AC199782.5_FG001
GRMZM6G829919	Zm00001d025988	GRMZM2G421212
GRMZM2G068220	Zm00001d014291	GRMZM2G071087
GRMZM2G085926	Zm00001d013247	GRMZM2G086287
GRMZM2G049672	Zm00001d031223	GRMZM2G423472
GRMZM2G134396	Zm00001d033396	GRMZM2G018414
GRMZM2G086287	Zm00001d002431	GRMZM2G417866
GRMZM2G021560	Zm00001d027550	GRMZM2G075901
GRMZM2G119485	Zm00001d021073	GRMZM5G817559
GRMZM2G106213	Zm00001d049888	GRMZM2G078283
GRMZM2G004023	Zm00001d023908	GRMZM2G078508
GRMZM2G149295	Zm00001d013295	GRMZM2G051403
GRMZM2G352708	Zm00001d026017	GRMZM2G181030
GRMZM2G039505	Zm00001d050935	GRMZM2G159691
GRMZM2G143128	Zm00001d040373	GRMZM2G119737
GRMZM5G838853	Zm00001d028825	GRMZM2G000632
GRMZM2G037334	Zm00001d008245	GRMZM2G027728
GRMZM2G348675	Zm00001d032999	GRMZM2G138455
GRMZM2G102242	Zm00001d052378	GRMZM2G103281
GRMZM2G132184	Zm00001d014967	GRMZM2G300866
GRMZM2G051129	Zm00001d010620	GRMZM2G132663
GRMZM2G325019	Zm00001d012969	GRMZM2G002765
GRMZM2G338259	Zm00001d031415	GRMZM2G419267
GRMZM2G053066	Zm00001d039079	GRMZM5G829778
GRMZM2G062591	Zm00001d052239	GRMZM2G025470
GRMZM5G841343	Zm00001d041718	GRMZM2G081935
GRMZM2G148118	Zm00001d021148	GRMZM5G841002
GRMZM2G181206	Zm00001d003836	GRMZM2G002978
GRMZM2G181148	Zm00001d002718	GRMZM5G825321
GRMZM2G053514	Zm00001d024749	GRMZM2G326222
GRMZM2G036120	Zm00001d027827	GRMZM2G412674
GRMZM2G059108	Zm00001d026191	GRMZM2G080516
GRMZM2G181259	Zm00001d049902	GRMZM2G051750
GRMZM2G074193	Zm00001d047335	GRMZM2G113866
GRMZM2G007453	Zm00001d018686	GRMZM2G026189
GRMZM2G338160	Zm00001d028443	GRMZM2G087275
GRMZM2G042539	Zm00001d045063	GRMZM2G106468
GRMZM2G062848	Zm00001d043425	GRMZM2G309660
GRMZM2G312078	Zm00001d041112	GRMZM2G086882
GRMZM2G033413	Zm00001d019759	GRMZM2G178333
GRMZM5G803556	Zm00001d046580	GRMZM2G048919
GRMZM2G053779	Zm00001d050436	AC205057.3_FG002
GRMZM2G091811	Zm00001d035115	GRMZM5G870170
GRMZM2G025250	Zm00001d013890	GRMZM2G122199
GRMZM2G035948	Zm00001d008454	GRMZM2G000292
GRMZM2G024335	Zm00001d051479	GRMZM2G170289
AC198169.4_FG004	Zm00001d021394	GRMZM2G041388
GRMZM2G051079	Zm00001d017604	GRMZM2G044495
GRMZM2G035042	Zm00001d038946	GRMZM2G481261
GRMZM2G704021	Zm00001d041214	GRMZM2G035520
GRMZM2G168281	Zm00001d046993	GRMZM2G083980
GRMZM2G142661	Zm00001d045080	GRMZM2G455243
GRMZM2G084279	Zm00001d047124	GRMZM2G117956
GRMZM2G431783	Zm00001d034128	GRMZM2G047656
GRMZM2G467466	Zm00001d008287	GRMZM2G050325
GRMZM2G415538	Zm00001d016702	GRMZM2G145958
GRMZM2G175177	Zm00001d015934	GRMZM2G008593
GRMZM2G010871	Zm00001d042550	GRMZM2G035092
GRMZM2G000816	Zm00001d043871	GRMZM2G164628
GRMZM2G017470	Zm00001d052123	GRMZM2G441144
GRMZM2G112672	Zm00001d013447	GRMZM2G177942
GRMZM2G462062	Zm00001d021900	GRMZM5G889052
GRMZM2G018798	Zm00001d044452	GRMZM2G034684
GRMZM2G121960	Zm00001d011967	GRMZM2G134162
GRMZM2G073199	Zm00001d042944	GRMZM2G126083
GRMZM2G026223	Zm00001d040805	GRMZM2G034896
GRMZM2G069106	Zm00001d031614	GRMZM2G165301
GRMZM2G392932	Zm00001d037235	GRMZM2G020742
GRMZM5G857303	Zm00001d050942	GRMZM2G020653
GRMZM2G324231	Zm00001d002158	GRMZM2G106393
GRMZM2G076263	Zm00001d041362	AC230011.2_FG002
GRMZM2G044531	Zm00001d025860	GRMZM2G005859
GRMZM2G098335	Zm00001d026248	GRMZM2G140924
GRMZM2G432918	Zm00001d042470	GRMZM2G113264
AC213654.3_FG001	Zm00001d034803	AC217358.3_FG009
GRMZM2G086648	Zm00001d048432	GRMZM2G115633
GRMZM2G077015	Zm00001d016529	GRMZM2G089655
GRMZM2G110922	Zm00001d052809	GRMZM2G002220
GRMZM2G068808	Zm00001d042962	GRMZM2G096470
GRMZM2G015793	Zm00001d029725	GRMZM2G162292
GRMZM2G115013	Zm00001d032866	GRMZM2G173315
GRMZM2G130686	Zm00001d034489	GRMZM2G574534
GRMZM2G165461	Zm00001d041258	GRMZM2G119523
GRMZM2G141814	Zm00001d051699	GRMZM2G148534
GRMZM2G174784	Zm00001d017351	GRMZM2G178595
GRMZM2G146694	Zm00001d018916	GRMZM2G089193
GRMZM5G816289	Zm00001d021025	GRMZM2G128935
GRMZM2G015344	Zm00001d019497	AC203753.4_FG007
GRMZM2G028014	Zm00001d044698	GRMZM2G152561
GRMZM2G161696	Zm00001d031764	GRMZM2G001803
GRMZM2G031591	Zm00001d017462	GRMZM2G466044
GRMZM2G006937	Zm00001d017550	GRMZM2G141503
AC187157.4_FG005	Zm00001d034344	GRMZM2G058734
GRMZM2G046088	Zm00001d037590	GRMZM2G159369
GRMZM2G496448	Zm00001d029462	GRMZM2G524711
GRMZM2G076946	Zm00001d051075	GRMZM2G004908
GRMZM2G109967	Zm00001d038795	GRMZM5G846097
GRMZM2G564101	Zm00001d009714	GRMZM2G162413
GRMZM5G816423	Zm00001d011483	GRMZM2G000177
GRMZM2G161619	Zm00001d042641	GRMZM2G019266
GRMZM2G039792	Zm00001d029424	GRMZM2G031591
GRMZM2G047851	Zm00001d023904	GRMZM2G064371
GRMZM2G140667	Zm00001d051321	GRMZM2G163193
AC225205.3_FG003	Zm00001d006428	GRMZM5G836167
GRMZM2G149932	Zm00001d037749	GRMZM2G132550
GRMZM2G038183	Zm00001d040667	GRMZM2G381473
GRMZM2G406204	Zm00001d033328	GRMZM2G038848
GRMZM2G112244	Zm00001d051965	GRMZM2G027075
GRMZM2G008095	Zm00001d037408	GRMZM5G858880
GRMZM2G303587	Zm00001d030172	GRMZM2G179528
GRMZM2G008444	Zm00001d045913	GRMZM2G369481
GRMZM2G323936	Zm00001d044290	GRMZM2G130375
GRMZM2G091916	Zm00001d053987	GRMZM2G153999
GRMZM2G179465	Zm00001d045782	AC204472.3_FG002
GRMZM2G180211	Zm00001d048138	GRMZM2G154149
GRMZM2G443445	Zm00001d023797	GRMZM2G087531
GRMZM2G092000	Zm00001d019670	GRMZM2G026218
GRMZM5G851929	Zm00001d012709	GRMZM2G160444
GRMZM2G115972	Zm00001d015700	GRMZM2G170577
GRMZM2G020864	Zm00001d008695	GRMZM2G143274
GRMZM2G159756	Zm00001d032548	GRMZM2G131618
GRMZM2G177229	Zm00001d039514	GRMZM2G141723
GRMZM2G083012	Zm00001d019282	GRMZM2G057296
GRMZM5G845366	Zm00001d028025	GRMZM2G155086
GRMZM2G024738	Zm00001d047170	GRMZM2G161255
GRMZM2G055607	Zm00001d052622	GRMZM2G091560
GRMZM2G066902	Zm00001d046784	GRMZM2G009633
GRMZM2G011915	Zm00001d048511	GRMZM2G700148
GRMZM2G305146	Zm00001d052901	GRMZM2G073199
GRMZM2G026983	Zm00001d016730	GRMZM2G071484
GRMZM2G128938	Zm00001d014868	GRMZM2G103182
GRMZM2G016602	Zm00001d013090	GRMZM2G306062
GRMZM2G178906	Zm00001d017505	GRMZM2G329532
GRMZM2G027439	Zm00001d047594	GRMZM2G064725
GRMZM2G177314	Zm00001d038998	GRMZM2G038183
GRMZM2G040263	Zm00001d016621	GRMZM2G005233
GRMZM2G461791	Zm00001d018625	GRMZM2G135839
GRMZM2G362312	Zm00001d029716	GRMZM2G132690
GRMZM5G880028	Zm00001d031216	GRMZM2G174554
GRMZM2G134104	Zm00001d012563	GRMZM2G409635
GRMZM2G063060	Zm00001d020160	GRMZM2G069085
GRMZM2G085661	Zm00001d009055	GRMZM2G075992
GRMZM2G389567	Zm00001d013617	GRMZM2G332390
GRMZM2G008593	Zm00001d051563	GRMZM2G050371
GRMZM2G069596	Zm00001d010588	AC197705.4_FG001
GRMZM2G065566	Zm00001d031023	GRMZM2G332821
GRMZM2G011806	Zm00001d016165	GRMZM2G126447
GRMZM5G800286	Zm00001d039282	GRMZM2G308619
GRMZM2G087275	Zm00001d043380	GRMZM2G163407
GRMZM2G138455	Zm00001d024876	GRMZM2G116626
GRMZM2G057475	Zm00001d038910	GRMZM2G004828
GRMZM2G048150	Zm00001d026010	GRMZM2G018314
GRMZM2G366142	Zm00001d026568	GRMZM2G164563
GRMZM2G066041	Zm00001d022310	GRMZM2G040600
GRMZM2G314396	Zm00001d052076	GRMZM2G181354
GRMZM2G017624	Zm00001d005847	GRMZM2G162177
GRMZM5G856881	Zm00001d022494	GRMZM2G348914
GRMZM2G180811	Zm00001d020551	GRMZM2G041163
GRMZM2G144042	Zm00001d026484	GRMZM2G104291
GRMZM2G013079	Zm00001d050484	GRMZM2G370915
GRMZM2G167549	Zm00001d007548	AC215723.3_FG001
GRMZM2G413044	Zm00001d008212	GRMZM2G157132
GRMZM2G353779	Zm00001d029648	GRMZM2G044481
GRMZM2G029323	Zm00001d041714	GRMZM2G323936
GRMZM2G007615	Zm00001d005275	GRMZM2G411260
GRMZM2G116584	Zm00001d006140	GRMZM2G022212
GRMZM2G153332	Zm00001d032935	GRMZM2G017237
GRMZM2G124566	Zm00001d006124	GRMZM2G022921
GRMZM2G035150	Zm00001d049290	GRMZM2G389937
GRMZM2G073401	Zm00001d045725	GRMZM2G457415
GRMZM2G165426	Zm00001d035079	GRMZM2G175995
GRMZM2G138245	Zm00001d006243	GRMZM2G151122
GRMZM2G112377	Zm00001d037783	GRMZM2G328785
GRMZM2G302664	Zm00001d026374	GRMZM5G854604
GRMZM2G033230	Zm00001d015811	GRMZM2G081642
GRMZM2G072339	Zm00001d015810	GRMZM2G081642
GRMZM2G069025	Zm00001d049760	GRMZM2G174149
GRMZM2G517332	Zm00001d024364	GRMZM2G097739
GRMZM2G044591	Zm00001d054049	GRMZM2G133660
GRMZM2G149257	Zm00001d043505	GRMZM2G039246
GRMZM2G145027	Zm00001d028369	GRMZM2G152549
GRMZM2G014441	Zm00001d023895	GRMZM2G050394
GRMZM2G156206	Zm00001d033060	GRMZM5G803556
GRMZM2G078876	Zm00001d038949	GRMZM2G079754
GRMZM2G172230	Zm00001d016542	GRMZM2G084279
GRMZM2G376085	Zm00001d038541	GRMZM2G117458
GRMZM2G065893	Zm00001d010185	GRMZM2G055641
GRMZM2G176630	Zm00001d021726	GRMZM2G465999
GRMZM2G149587	Zm00001d048414	AC233901.1_FG010
GRMZM2G177942	Zm00001d051628	GRMZM2G042356
GRMZM2G074908	Zm00001d013058	GRMZM5G819452
GRMZM6G112751	Zm00001d002925	GRMZM2G031360
GRMZM2G077809	Zm00001d031258	GRMZM2G023791
GRMZM2G111451	Zm00001d023968	GRMZM2G124974
GRMZM2G170307	Zm00001d028144	GRMZM2G153920
GRMZM2G089850	Zm00001d031835	GRMZM5G829831
GRMZM2G134341	Zm00001d044244	GRMZM2G022368
GRMZM2G131912	Zm00001d013497	GRMZM5G845366
GRMZM2G077219	Zm00001d034674	GRMZM2G055834
GRMZM5G860632	Zm00001d002285	GRMZM2G156977
GRMZM2G095826	Zm00001d042262	GRMZM2G126266
GRMZM2G094050	Zm00001d016731	GRMZM2G092588
GRMZM2G040102	Zm00001d008179	GRMZM2G384298
GRMZM2G150754	Zm00001d040127	GRMZM2G355636
GRMZM2G054418	Zm00001d043851	GRMZM2G152127
GRMZM2G078468	Zm00001d023640	GRMZM2G426486
GRMZM2G081943	Zm00001d004099	GRMZM2G022107
GRMZM2G006071	Zm00001d024841	GRMZM2G138252
GRMZM2G017666	Zm00001d040508	GRMZM2G133802
GRMZM2G033519	Zm00001d040509	GRMZM2G133802
GRMZM2G007028	Zm00001d036797	GRMZM2G026802
GRMZM2G083367	Zm00001d026501	GRMZM5G885867
GRMZM2G001289	Zm00001d001961	GRMZM2G365188
GRMZM2G023836	Zm00001d035297	GRMZM2G002115
GRMZM2G376548	Zm00001d020783	GRMZM2G314679
GRMZM5G850640	Zm00001d003321	GRMZM5G807350
GRMZM2G318592	Zm00001d042425	GRMZM2G366142
GRMZM2G116426	Zm00001d039073	GRMZM2G145563
GRMZM2G092137	Zm00001d048481	GRMZM2G171595
GRMZM2G062390	Zm00001d043015	GRMZM2G141392
GRMZM2G161310	Zm00001d049929	GRMZM2G014069
GRMZM2G027431	Zm00001d014889	GRMZM2G313341
GRMZM2G095382	Zm00001d004072	GRMZM2G052386
GRMZM2G123977	Zm00001d025916	GRMZM2G040803
GRMZM2G105522	Zm00001d021745	GRMZM2G050933
GRMZM5G881902	Zm00001d035526	GRMZM2G024576
GRMZM5G868917	Zm00001d004079	GRMZM2G474153
GRMZM2G026802	Zm00001d004078	GRMZM2G474153
GRMZM2G134756	Zm00001d003423	GRMZM2G065480
GRMZM2G121458	Zm00001d054074	GRMZM2G163304
GRMZM2G143082	Zm00001d013287	GRMZM2G014441
GRMZM2G024927	Zm00001d043256	GRMZM2G364375
GRMZM2G000593	Zm00001d029209	AC204530.4_FG006
GRMZM2G095147	Zm00001d023695	GRMZM2G088974
GRMZM2G164502	Zm00001d022350	GRMZM2G317535
GRMZM5G819919	Zm00001d019922	GRMZM2G049155
GRMZM2G057301	Zm00001d044466	GRMZM2G001219
GRMZM2G028685	Zm00001d021288	GRMZM2G091837
GRMZM2G062160	Zm00001d006535	GRMZM2G087625
GRMZM2G158305	Zm00001d003068	GRMZM2G049541
GRMZM2G059821	Zm00001d040034	GRMZM2G054050
GRMZM2G701553	Zm00001d035723	GRMZM2G150289
GRMZM2G353209	Zm00001d037073	GRMZM2G127251
GRMZM2G324860	Zm00001d005279	GRMZM2G136042
GRMZM2G011491	Zm00001d006471	GRMZM2G301738
GRMZM2G177715	Zm00001d011792	GRMZM2G167872
GRMZM2G105387	Zm00001d031860	GRMZM2G056686
GRMZM2G417070	Zm00001d049717	GRMZM2G135547
GRMZM2G151706	Zm00001d004649	GRMZM2G076905
GRMZM2G142609	Zm00001d029004	GRMZM2G110406
GRMZM2G063276	Zm00001d048588	GRMZM2G018254
GRMZM2G018721	Zm00001d011841	GRMZM2G340313
GRMZM2G418232	Zm00001d011925	GRMZM2G095541
GRMZM2G333916	Zm00001d038186	GRMZM2G026523
GRMZM2G025126	Zm00001d012931	GRMZM2G121826
GRMZM2G083975	Zm00001d042064	GRMZM2G310069
GRMZM2G017086	Zm00001d021898	GRMZM2G121543
GRMZM2G042164	Zm00001d018529	GRMZM2G145133
GRMZM2G002220	Zm00001d028680	GRMZM2G042107
GRMZM2G138632	Zm00001d016049	GRMZM2G109315
GRMZM2G046288	Zm00001d052545	GRMZM2G419777
GRMZM2G041163	Zm00001d036568	GRMZM2G094074
GRMZM2G052178	Zm00001d006027	GRMZM2G125934
GRMZM2G174137	Zm00001d028870	GRMZM2G475971
GRMZM2G122941	Zm00001d034277	GRMZM2G163251
GRMZM2G173579	Zm00001d017659	GRMZM2G126580
GRMZM2G096622	Zm00001d041941	GRMZM2G164502
GRMZM2G020034	Zm00001d011737	GRMZM2G169571
GRMZM2G089484	Zm00001d049418	GRMZM2G030772
GRMZM2G336962	Zm00001d043082	GRMZM2G350399
GRMZM2G035202	Zm00001d039355	GRMZM2G085176
GRMZM2G008665	Zm00001d037703	GRMZM2G399961
GRMZM5G841101	Zm00001d047528	GRMZM2G027499
GRMZM2G366584	Zm00001d008194	GRMZM2G386987
GRMZM2G151122	Zm00001d031123	GRMZM2G115972
GRMZM2G107540	Zm00001d047622	GRMZM2G368350
AC218998.2_FG007	Zm00001d052695	GRMZM2G016997
GRMZM5G868588	Zm00001d031587	GRMZM5G894518
GRMZM2G165675	Zm00001d042639	GRMZM2G129444
GRMZM2G121186	Zm00001d046902	GRMZM2G008359
GRMZM2G008273	Zm00001d007618	GRMZM2G034271
GRMZM2G029107	Zm00001d010589	AC197705.4_FG006
GRMZM2G307088	Zm00001d006789	GRMZM2G464000
GRMZM2G100120	Zm00001d043194	GRMZM2G047028
GRMZM2G133400	Zm00001d009134	GRMZM2G428628
GRMZM2G106331	Zm00001d052125	GRMZM2G165991
GRMZM2G701362	Zm00001d030620	GRMZM2G044354
GRMZM2G128146	Zm00001d012674	GRMZM2G116087
AC217358.3_FG005	Zm00001d014175	GRMZM2G046021
GRMZM2G017110	Zm00001d032465	GRMZM2G123624
AC233901.1_FG010	Zm00001d026095	GRMZM2G001363
GRMZM2G005678	Zm00001d045897	GRMZM2G158595
GRMZM2G117357	Zm00001d028538	GRMZM2G093217
GRMZM2G011518	Zm00001d034546	GRMZM2G013206
GRMZM2G144173	Zm00001d008468	GRMZM2G333022
GRMZM2G152768	Zm00001d022256	GRMZM2G180568
GRMZM2G143655	Zm00001d015026	GRMZM2G120578
GRMZM2G021781	Zm00001d029102	GRMZM2G073755
GRMZM2G124882	Zm00001d043511	GRMZM5G856653
GRMZM2G164482	Zm00001d010025	GRMZM2G058358
GRMZM5G837822	Zm00001d002984	GRMZM2G035755
GRMZM5G804941	Zm00001d037512	GRMZM2G064001
GRMZM2G362631	Zm00001d027509	GRMZM2G409976
GRMZM2G146219	Zm00001d025182	GRMZM2G091168
GRMZM2G411653	Zm00001d012263	GRMZM2G334791
GRMZM2G103892	Zm00001d053843	GRMZM2G419994
GRMZM2G173084	Zm00001d006161	GRMZM2G164945
GRMZM2G123831	Zm00001d047995	GRMZM2G105834
GRMZM2G043893	Zm00001d050905	GRMZM2G145027
GRMZM2G133941	Zm00001d037637	GRMZM2G028110
GRMZM2G119146	Zm00001d037719	GRMZM2G133631
GRMZM2G152561	Zm00001d021215	GRMZM2G443560
GRMZM2G043414	Zm00001d036893	GRMZM2G099691
GRMZM2G008623	Zm00001d027838	GRMZM2G091916
GRMZM2G151913	Zm00001d036205	GRMZM2G430152
GRMZM2G314233	Zm00001d043187	AC213654.3_FG005
GRMZM2G340756	Zm00001d013042	GRMZM2G025164
GRMZM2G010389	Zm00001d005624	GRMZM2G179120
GRMZM5G836322	Zm00001d019671	GRMZM2G515595
GRMZM2G064723	Zm00001d015374	GRMZM2G128012
GRMZM2G078024	Zm00001d047814	GRMZM2G151992
GRMZM2G006377	Zm00001d022108	GRMZM2G038338
GRMZM2G154422	Zm00001d005661	GRMZM2G139994
GRMZM2G036837	Zm00001d045354	GRMZM2G035665
GRMZM5G839530	Zm00001d007366	GRMZM2G094978
AC194970.5_FG009	Zm00001d035390	GRMZM2G014055
GRMZM2G056513	Zm00001d025955	GRMZM2G065176
GRMZM2G178996	Zm00001d026706	GRMZM5G836471
GRMZM2G036567	Zm00001d030282	GRMZM2G038973
GRMZM2G139903	Zm00001d021732	GRMZM2G103972
GRMZM5G898371	Zm00001d015616	GRMZM5G815077
GRMZM2G455687	Zm00001d036281	GRMZM2G700968
GRMZM2G159134	Zm00001d034649	GRMZM2G012280
GRMZM2G070673	Zm00001d052139	GRMZM2G428027
GRMZM5G812270	Zm00001d017145	GRMZM2G128880
GRMZM2G095094	Zm00001d042543	GRMZM2G064723
GRMZM2G140674	Zm00001d039816	GRMZM2G067530
GRMZM2G067747	Zm00001d047126	GRMZM2G118022
GRMZM5G823162	Zm00001d021867	GRMZM2G338205
GRMZM2G095333	Zm00001d014162	GRMZM2G168240
GRMZM2G338702	Zm00001d004293	GRMZM2G008864
AC197705.4_FG001	Zm00001d011720	GRMZM2G408706
AC234149.1_FG002	Zm00001d005375	GRMZM2G018813
GRMZM2G173257	Zm00001d042567	GRMZM2G006453
GRMZM2G169412	Zm00001d047547	GRMZM2G102657
GRMZM2G099420	Zm00001d040408	GRMZM2G128895
AC197717.3_FG002	Zm00001d018384	GRMZM2G075978
GRMZM2G059700	Zm00001d044435	GRMZM2G002568
GRMZM2G000632	Zm00001d052377	GRMZM2G020864
GRMZM2G110406	Zm00001d020117	GRMZM5G825192
GRMZM2G164136	Zm00001d034650	GRMZM2G148370
GRMZM2G348846	Zm00001d034624	AC206259.3_FG003
GRMZM2G004690	Zm00001d013257	GRMZM2G071745
GRMZM2G044819	Zm00001d047764	GRMZM2G011071
GRMZM5G878530	Zm00001d049159	GRMZM2G104384
GRMZM2G131421	Zm00001d043473	GRMZM2G167283
GRMZM2G173192	Zm00001d022188	GRMZM2G102786
GRMZM2G147399	Zm00001d024804	GRMZM2G337143
GRMZM2G084812	Zm00001d004331	GRMZM2G061929
GRMZM2G107187	Zm00001d011881	GRMZM2G129154
GRMZM2G018414	Zm00001d039100	GRMZM2G454514
GRMZM2G142660	Zm00001d012602	GRMZM2G139193
GRMZM2G033135	Zm00001d012444	AC233788.2_FG003
GRMZM5G843555	Zm00001d034577	GRMZM2G064503
GRMZM2G024345	Zm00001d015378	GRMZM2G010321
GRMZM2G303655	Zm00001d031971	GRMZM2G456217
AC205703.4_FG005	Zm00001d048362	GRMZM2G059937
GRMZM2G023364	Zm00001d031750	GRMZM2G154267
AC203989.4_FG001	Zm00001d031751	GRMZM2G154267
GRMZM2G034623	Zm00001d044748	GRMZM2G027627
GRMZM2G113163	Zm00001d018694	GRMZM2G043383
GRMZM2G004795	Zm00001d026293	GRMZM2G108125
AC185108.3_FG011	Zm00001d028642	GRMZM2G096231
GRMZM2G119248	Zm00001d029755	GRMZM2G396482
GRMZM2G084489	Zm00001d033098	GRMZM2G012119
GRMZM2G005024	Zm00001d041847	GRMZM2G340756
GRMZM2G044354	Zm00001d025979	GRMZM2G386430
GRMZM2G392956	Zm00001d017751	GRMZM2G325019
GRMZM2G044472	Zm00001d004908	GRMZM2G044493
GRMZM2G012030	Zm00001d017473	GRMZM2G056903
GRMZM2G019386	Zm00001d005846	GRMZM2G005486
GRMZM2G177915	Zm00001d020982	GRMZM2G386163
GRMZM2G022258	Zm00001d040113	GRMZM2G152689
GRMZM2G002656	Zm00001d036922	GRMZM2G107027
GRMZM2G084802	Zm00001d014711	GRMZM2G385851
GRMZM2G008714	Zm00001d008417	GRMZM2G356404
GRMZM2G341271	Zm00001d002161	GRMZM2G106511
GRMZM2G132804	Zm00001d019043	GRMZM2G038839
GRMZM2G429857	Zm00001d049046	GRMZM2G377115
GRMZM5G858317	Zm00001d039911	GRMZM2G022897
GRMZM2G017426	Zm00001d005462	GRMZM2G092648
AC234185.1_FG007	Zm00001d020658	GRMZM2G161619
GRMZM5G852779	Zm00001d018206	GRMZM5G878558
GRMZM5G869246	Zm00001d048101	GRMZM5G800925
GRMZM2G009719	Zm00001d046568	GRMZM2G055243
GRMZM2G005859	Zm00001d038303	GRMZM2G161507
GRMZM2G141600	Zm00001d033395	GRMZM2G323943
GRMZM2G354338	Zm00001d031009	GRMZM2G322090
GRMZM2G050394	Zm00001d044725	GRMZM2G415022
GRMZM5G835772	Zm00001d032376	GRMZM2G077068
GRMZM2G022679	Zm00001d031471	GRMZM2G056056
GRMZM5G836939	Zm00001d018390	GRMZM2G170413
GRMZM2G004519	Zm00001d042366	GRMZM2G149837
GRMZM2G019257	Zm00001d028561	GRMZM2G306679
GRMZM2G324111	Zm00001d049727	AC193632.2_FG002
GRMZM2G163436	Zm00001d014614	GRMZM2G026980
GRMZM2G420334	Zm00001d044657	GRMZM2G138496
GRMZM2G162154	Zm00001d010749	AC234149.1_FG002
GRMZM2G475956	Zm00001d013470	GRMZM2G157166
GRMZM5G866423	Zm00001d024205	GRMZM2G364285
GRMZM2G131784	Zm00001d051683	GRMZM2G343449
GRMZM2G103079	Zm00001d034187	GRMZM2G072553
GRMZM5G899188	Zm00001d048193	GRMZM2G096348
GRMZM2G173700	Zm00001d002607	GRMZM2G003752
GRMZM2G076972	Zm00001d047358	GRMZM2G149273
GRMZM2G403609	Zm00001d026671	GRMZM2G177151
GRMZM2G168706	Zm00001d017263	GRMZM2G095382
GRMZM5G864266	Zm00001d049136	GRMZM2G151706
GRMZM2G382341	Zm00001d043849	GRMZM2G452807
GRMZM2G385050	Zm00001d038459	GRMZM2G410782
GRMZM2G068506	Zm00001d009082	GRMZM2G388703
GRMZM2G169116	Zm00001d049938	GRMZM2G132371
GRMZM2G168476	Zm00001d028119	GRMZM2G440363
GRMZM2G156218	Zm00001d012226	GRMZM2G092759
GRMZM2G317801	Zm00001d042572	GRMZM2G329069
GRMZM2G452717	Zm00001d024545	GRMZM2G180168
GRMZM2G334041	Zm00001d052191	GRMZM2G008819
GRMZM2G121487	Zm00001d038372	GRMZM2G146219
GRMZM2G142413	Zm00001d044443	GRMZM2G143139
GRMZM2G053503	Zm00001d007500	GRMZM2G457381
GRMZM2G073303	Zm00001d034703	GRMZM2G120421
GRMZM2G050384	Zm00001d034771	GRMZM2G113250
GRMZM2G040803	Zm00001d032214	GRMZM2G127429
GRMZM2G076345	Zm00001d051511	GRMZM2G091044
GRMZM2G129450	Zm00001d002317	GRMZM2G007453
GRMZM2G303149	Zm00001d039059	GRMZM2G348873
GRMZM2G367857	Zm00001d046468	GRMZM2G443953
GRMZM2G419994	Zm00001d036298	GRMZM2G119865
GRMZM2G113355	Zm00001d010216	GRMZM2G071319
AC233863.1_FG002	Zm00001d047617	GRMZM2G358238
GRMZM2G146378	Zm00001d028875	GRMZM2G003984
GRMZM2G409865	Zm00001d011319	GRMZM2G400533
GRMZM5G833477	Zm00001d041777	GRMZM2G077015
GRMZM2G366698	Zm00001d030940	GRMZM2G038855
GRMZM2G088974	Zm00001d003347	GRMZM2G330430
AC192367.2_FG002	Zm00001d017773	GRMZM2G115701
GRMZM2G003979	Zm00001d014467	GRMZM2G085967
GRMZM2G319169	Zm00001d040515	GRMZM2G046924
GRMZM2G042107	Zm00001d045757	GRMZM2G408359
GRMZM2G318635	Zm00001d012446	GRMZM5G801793
AC217499.3_FG003	Zm00001d012063	GRMZM2G031338
GRMZM2G090657	Zm00001d022590	GRMZM2G005732
GRMZM2G054056	Zm00001d008794	GRMZM2G083350
GRMZM2G440951	Zm00001d002658	GRMZM2G176647
GRMZM2G140994	Zm00001d028768	GRMZM2G452695
GRMZM2G151529	Zm00001d002754	GRMZM2G044752
GRMZM2G038677	Zm00001d014865	GRMZM2G059212
GRMZM2G338493	Zm00001d028915	GRMZM2G329040
GRMZM2G365188	Zm00001d028453	GRMZM2G338702
GRMZM2G045330	Zm00001d047767	GRMZM2G162460
GRMZM2G122999	Zm00001d004672	GRMZM2G096663
GRMZM2G034025	Zm00001d016348	GRMZM2G467391
GRMZM2G163304	Zm00001d014993	GRMZM2G114793
GRMZM2G032336	Zm00001d009708	GRMZM2G058305
GRMZM2G073044	Zm00001d045944	GRMZM2G172152
GRMZM2G301405	Zm00001d025940	GRMZM2G155387
GRMZM2G154946	Zm00001d013271	GRMZM2G172011
GRMZM2G006716	Zm00001d038133	GRMZM2G117298
GRMZM2G127510	Zm00001d052021	GRMZM2G450055
GRMZM2G052078	Zm00001d027518	GRMZM2G007441
AC206259.3_FG003	Zm00001d041353	GRMZM5G839416
GRMZM5G838938	Zm00001d008598	AC187393.3_FG001
GRMZM2G083980	Zm00001d003091	GRMZM2G111975
GRMZM2G516387	Zm00001d014757	GRMZM2G116140
AC155434.2_FG004	Zm00001d022493	GRMZM2G047995
GRMZM2G085964	Zm00001d029051	GRMZM2G075262
GRMZM5G895064	Zm00001d018371	GRMZM2G178996
GRMZM2G363728	Zm00001d032472	GRMZM2G031572
GRMZM5G854499	Zm00001d020431	GRMZM2G178522
GRMZM2G053117	Zm00001d015012	GRMZM2G156824
GRMZM2G048775	Zm00001d009709	GRMZM2G044591
GRMZM2G041561	Zm00001d039057	GRMZM2G048892
GRMZM5G879009	Zm00001d018854	GRMZM2G164454
GRMZM2G093404	Zm00001d010275	GRMZM2G334899
GRMZM2G107571	Zm00001d017270	GRMZM2G096753
GRMZM2G018951	Zm00001d039312	GRMZM2G170013
GRMZM2G009080	Zm00001d023640	GRMZM2G303655
GRMZM2G162177	Zm00001d036711	GRMZM2G318592
GRMZM2G421495	Zm00001d050316	GRMZM2G132857
GRMZM2G049418	Zm00001d012322	GRMZM2G087875
GRMZM2G095921	Zm00001d040253	EF517601.1_FG009
AC187896.3_FG006	Zm00001d021679	GRMZM2G165644
GRMZM2G437119	Zm00001d019513	GRMZM5G805008
GRMZM2G075104	Zm00001d047570	GRMZM2G161664
GRMZM5G869572	Zm00001d009749	GRMZM2G023418
GRMZM2G075901	Zm00001d017014	GRMZM5G882364
GRMZM5G888696	Zm00001d008512	GRMZM2G119345
GRMZM2G075459	Zm00001d025814	GRMZM2G414503
GRMZM2G127780	Zm00001d013045	GRMZM2G139805
GRMZM2G108115	Zm00001d001811	GRMZM2G155877
GRMZM2G168953	Zm00001d047968	GRMZM2G165355
GRMZM2G354093	Zm00001d028751	AC208201.3_FG003
GRMZM2G334409	Zm00001d020837	GRMZM2G089850
GRMZM2G092586	Zm00001d031264	GRMZM2G136347
GRMZM2G464523	Zm00001d022581	GRMZM2G134396
GRMZM2G348890	Zm00001d011303	GRMZM2G310158
GRMZM2G335126	Zm00001d021828	GRMZM2G006942
GRMZM2G141510	Zm00001d043093	GRMZM2G009849
GRMZM2G134234	Zm00001d017793	GRMZM2G147377
GRMZM5G822947	Zm00001d026610	GRMZM2G043776
GRMZM2G006661	Zm00001d042090	GRMZM2G301172
GRMZM2G000371	Zm00001d014610	GRMZM2G064562
GRMZM2G157598	Zm00001d018155	GRMZM2G103128
GRMZM2G068323	Zm00001d002034	GRMZM2G033219
GRMZM2G462613	Zm00001d025082	AC204711.3_FG002
GRMZM2G045467	Zm00001d010445	GRMZM2G165567
AC209208.3_FG001	Zm00001d011363	GRMZM2G024315
GRMZM2G074024	Zm00001d013441	GRMZM2G149406
GRMZM2G135808	Zm00001d021207	GRMZM2G069126
GRMZM2G024517	Zm00001d045334	GRMZM2G403190
GRMZM2G048912	Zm00001d020463	GRMZM2G029153
GRMZM2G316362	Zm00001d052927	GRMZM2G327659
GRMZM2G344212	Zm00001d023303	GRMZM5G819919
GRMZM2G427350	Zm00001d034240	GRMZM2G072569
GRMZM2G124883	Zm00001d050827	GRMZM2G060464
GRMZM2G002002	Zm00001d051691	GRMZM2G105522
GRMZM5G895400	Zm00001d042169	GRMZM2G076621
GRMZM2G031859	Zm00001d007868	GRMZM2G020805
GRMZM2G046816	Zm00001d005193	GRMZM5G876616
GRMZM2G464000	Zm00001d007688	GRMZM2G452954
GRMZM5G885445	Zm00001d015748	GRMZM2G305096
GRMZM2G477694	Zm00001d047579	GRMZM2G134279
GRMZM2G433801	Zm00001d037028	GRMZM2G071638
GRMZM2G467799	Zm00001d013647	GRMZM2G448511
GRMZM2G084252	Zm00001d051135	GRMZM2G162637
GRMZM2G019991	Zm00001d037125	GRMZM2G118309
GRMZM5G858880	Zm00001d023774	GRMZM2G106177
GRMZM2G007229	Zm00001d050753	GRMZM2G064145
GRMZM2G353213	Zm00001d033931	GRMZM2G442658
GRMZM2G340456	Zm00001d036420	GRMZM2G417004
GRMZM2G001508	Zm00001d022269	GRMZM2G126706
GRMZM2G035243	Zm00001d051103	GRMZM2G094083
GRMZM2G480106	Zm00001d044573	GRMZM2G113365
GRMZM2G339848	Zm00001d007381	GRMZM2G160515
GRMZM2G120918	Zm00001d008216	GRMZM2G042636
GRMZM2G313737	Zm00001d026639	GRMZM2G173636
GRMZM2G163444	Zm00001d045973	GRMZM2G398628
GRMZM2G003861	Zm00001d028698	GRMZM2G109967
GRMZM2G097068	Zm00001d021056	GRMZM5G806833
GRMZM2G054380	Zm00001d020312	AC225555.3_FG005
GRMZM2G131443	Zm00001d028419	GRMZM2G321033
GRMZM2G420121	Zm00001d032670	GRMZM2G131723
GRMZM2G416069	Zm00001d047681	GRMZM2G306482
GRMZM2G057265	Zm00001d004446	GRMZM2G392106
GRMZM2G075096	Zm00001d027975	GRMZM2G398848
GRMZM2G034639	Zm00001d015259	GRMZM2G314233
GRMZM5G871425	Zm00001d022338	AC198481.3_FG004
GRMZM2G137558	Zm00001d049259	GRMZM2G030862
GRMZM2G071294	Zm00001d028863	GRMZM2G022945
GRMZM2G479717	Zm00001d012536	GRMZM2G148586
GRMZM2G433117	Zm00001d011644	GRMZM2G014089
GRMZM2G135314	Zm00001d007201	GRMZM2G402262
GRMZM2G053574	Zm00001d026165	GRMZM2G091581
GRMZM5G836167	Zm00001d047774	GRMZM2G347717
GRMZM2G114918	Zm00001d015592	GRMZM2G401463
GRMZM2G459642	Zm00001d034049	GRMZM5G826714
GRMZM2G443240	Zm00001d003658	GRMZM2G155626
GRMZM5G804382	Zm00001d053635	GRMZM2G360677
GRMZM2G045155	Zm00001d043366	GRMZM2G111637
GRMZM2G175995	Zm00001d039643	GRMZM2G479038
GRMZM2G407631	Zm00001d031556	GRMZM2G427451
GRMZM2G436429	Zm00001d038829	GRMZM2G158901
GRMZM2G116542	Zm00001d047937	GRMZM2G448330
GRMZM5G801241	Zm00001d042739	GRMZM2G135722
GRMZM2G003417	Zm00001d039532	GRMZM2G176489
GRMZM2G129674	Zm00001d018367	GRMZM2G051005
GRMZM2G124377	Zm00001d005047	GRMZM2G304212
GRMZM5G808775	Zm00001d027296	GRMZM2G703466
GRMZM2G126161	Zm00001d021087	GRMZM2G059225
GRMZM2G123212	Zm00001d016891	GRMZM2G070708
GRMZM2G515595	Zm00001d044395	GRMZM2G035134
GRMZM2G095104	Zm00001d017166	GRMZM2G314656
GRMZM2G156517	Zm00001d010454	GRMZM2G150201
GRMZM2G434541	Zm00001d045397	GRMZM2G433433
GRMZM2G333775	Zm00001d048709	GRMZM2G085381
GRMZM2G022107	Zm00001d048789	GRMZM2G165325
GRMZM2G385605	Zm00001d030774	GRMZM2G086887
GRMZM2G404599	Zm00001d037385	GRMZM2G114801
GRMZM2G081919	Zm00001d012340	GRMZM2G436332
GRMZM2G014805	Zm00001d010491	GRMZM2G134230
GRMZM2G038973	Zm00001d042549	GRMZM5G807064
GRMZM2G086887	Zm00001d004152	GRMZM2G106331
GRMZM2G101271	Zm00001d047366	GRMZM2G462537
GRMZM2G156643	Zm00001d028593	GRMZM2G337425
GRMZM5G899390	Zm00001d011795	GRMZM2G167863
GRMZM2G145221	Zm00001d009595	GRMZM2G448605
GRMZM5G894518	Zm00001d034937	GRMZM2G077183
GRMZM2G544539	Zm00001d018472	GRMZM5G871520
AC217556.3_FG003	Zm00001d006527	GRMZM2G175874
GRMZM2G300866	Zm00001d022582	GRMZM2G134341
GRMZM2G090100	Zm00001d031300	GRMZM2G037265
GRMZM2G083394	Zm00001d002644	GRMZM2G318956
AC205677.3_FG001	Zm00001d040213	GRMZM2G401267
GRMZM2G703415	Zm00001d031221	GRMZM5G893912
GRMZM5G862565	Zm00001d042259	GRMZM2G392932
GRMZM2G121785	Zm00001d013302	GRMZM2G077356
GRMZM2G179421	Zm00001d033471	GRMZM2G149219
GRMZM2G087749	Zm00001d038074	GRMZM5G869840
GRMZM2G153150	Zm00001d005920	GRMZM2G414528
GRMZM2G424509	Zm00001d027846	GRMZM2G162749
GRMZM2G134214	Zm00001d001811	AC190792.2_FG006
GRMZM2G110330	Zm00001d015339	GRMZM2G459142
GRMZM2G041369	Zm00001d034575	GRMZM2G134227
GRMZM2G001363	Zm00001d036656	GRMZM2G050701
GRMZM5G814985	Zm00001d044979	GRMZM2G033130
GRMZM2G113726	Zm00001d002770	GRMZM2G086648
GRMZM2G162598	Zm00001d053685	GRMZM2G064023
GRMZM2G010944	Zm00001d010023	GRMZM2G102745
GRMZM2G008497	Zm00001d050434	GRMZM2G123362
GRMZM2G162702	Zm00001d019333	GRMZM2G328258
GRMZM2G097812	Zm00001d032461	GRMZM2G176209
GRMZM2G445617	Zm00001d025263	GRMZM2G467640
GRMZM2G570528	Zm00001d038072	GRMZM2G023836
GRMZM2G076392	Zm00001d010892	GRMZM2G037350
GRMZM2G150289	Zm00001d037494	GRMZM2G302664
GRMZM2G300965	Zm00001d038064	GRMZM2G132478
GRMZM2G088930	Zm00001d026322	GRMZM2G029242
GRMZM2G043456	Zm00001d051561	GRMZM2G110287
GRMZM2G058447	Zm00001d049958	GRMZM2G049525
GRMZM2G070172	Zm00001d005241	GRMZM2G150754
GRMZM2G172152	Zm00001d028129	GRMZM2G005624
GRMZM2G106511	Zm00001d020213	GRMZM2G132184
GRMZM2G309660	Zm00001d028230	AC208897.3_FG004
GRMZM2G155949	Zm00001d046534	GRMZM2G042870
GRMZM2G178758	Zm00001d015497	GRMZM2G364988
GRMZM2G122543	Zm00001d044554	GRMZM2G021422
GRMZM2G167872	Zm00001d037975	GRMZM2G068323
GRMZM2G073272	Zm00001d002489	GRMZM2G131280
GRMZM2G107731	Zm00001d014108	GRMZM2G146374
GRMZM2G152194	Zm00001d018682	GRMZM2G071436
GRMZM2G042677	Zm00001d002302	GRMZM2G089273
GRMZM5G874082	Zm00001d046483	GRMZM2G095206
GRMZM2G414503	Zm00001d043216	GRMZM2G008109
GRMZM2G129954	Zm00001d047324	GRMZM5G897980
GRMZM2G173777	Zm00001d043430	AC210193.4_FG002
GRMZM2G075320	Zm00001d006651	GRMZM2G099167
GRMZM5G816791	Zm00001d029377	GRMZM2G107495
GRMZM2G025340	Zm00001d008982	GRMZM2G359018
GRMZM2G031624	Zm00001d017326	GRMZM2G159918
GRMZM5G851807	Zm00001d006508	GRMZM2G125495
GRMZM2G051355	Zm00001d047911	GRMZM2G101062
GRMZM2G038050	Zm00001d002260	GRMZM2G076239
GRMZM2G142168	Zm00001d004738	GRMZM2G088778
GRMZM2G039600	Zm00001d032030	GRMZM2G303149
GRMZM2G432846	Zm00001d043292	GRMZM2G093239
GRMZM2G411536	Zm00001d052843	GRMZM2G034024
GRMZM2G465257	Zm00001d037513	GRMZM2G064096
GRMZM2G475971	Zm00001d028720	GRMZM2G319781
GRMZM2G112799	Zm00001d033833	GRMZM2G024958
AC218457.2_FG013	Zm00001d033831	GRMZM2G024958
GRMZM2G088064	Zm00001d048252	GRMZM2G100120
GRMZM2G083972	Zm00001d023652	GRMZM2G126002
GRMZM2G050177	Zm00001d048031	GRMZM2G356579
GRMZM2G175474	Zm00001d007781	GRMZM2G147908
GRMZM2G137968	Zm00001d048672	GRMZM2G001160
GRMZM2G071491	Zm00001d043528	GRMZM5G886177
GRMZM2G106233	Zm00001d024094	GRMZM2G074818
GRMZM2G114220	Zm00001d042480	GRMZM2G115000
GRMZM2G122199	Zm00001d041025	GRMZM2G156813
GRMZM2G364285	Zm00001d024799	GRMZM2G016346
GRMZM2G132464	Zm00001d016080	GRMZM2G039443
GRMZM2G401062	Zm00001d044816	GRMZM2G110832
GRMZM2G017257	Zm00001d016760	GRMZM2G057841
GRMZM2G329069	Zm00001d031064	GRMZM2G081158
GRMZM2G466139	Zm00001d036521	GRMZM2G100976
GRMZM2G439339	Zm00001d020708	GRMZM2G162598
GRMZM2G093098	Zm00001d002817	GRMZM5G860469
GRMZM2G043995	Zm00001d042881	GRMZM2G046436
GRMZM2G104325	Zm00001d012750	GRMZM2G118409
GRMZM2G089400	Zm00001d025353	GRMZM2G095810
GRMZM2G314656	Zm00001d011602	GRMZM2G169116
GRMZM2G011636	Zm00001d006204	GRMZM2G073942
GRMZM2G457630	Zm00001d051591	GRMZM2G342515
GRMZM2G028677	Zm00001d025900	GRMZM2G046782
GRMZM5G858310	Zm00001d029393	GRMZM2G152925
GRMZM2G139341	Zm00001d033980	GRMZM2G149923
GRMZM2G080499	Zm00001d011165	GRMZM2G029833
GRMZM2G129444	Zm00001d010108	GRMZM5G824333
GRMZM2G177151	Zm00001d003670	GRMZM5G806108
GRMZM2G026780	Zm00001d053881	GRMZM2G155384
GRMZM2G052435	Zm00001d020978	GRMZM2G340456
GRMZM2G024992	Zm00001d034499	AC215195.3_FG005
GRMZM5G840887	Zm00001d012809	GRMZM2G035150
AC218972.3_FG001	Zm00001d007871	GRMZM2G021921
GRMZM2G089273	Zm00001d005813	GRMZM2G005954
GRMZM2G030402	Zm00001d034011	GRMZM2G010037
GRMZM2G023325	Zm00001d005675	GRMZM2G039155
GRMZM2G300709	Zm00001d006297	GRMZM2G117865
GRMZM2G138676	Zm00001d046743	GRMZM2G041022
GRMZM2G136369	Zm00001d017114	GRMZM2G144166
GRMZM2G005522	Zm00001d045675	GRMZM2G074589
GRMZM2G161255	Zm00001d016075	GRMZM2G092154
GRMZM2G153725	Zm00001d007802	GRMZM2G082809
GRMZM2G149175	Zm00001d043117	GRMZM2G159134
AC214119.3_FG009	Zm00001d012320	GRMZM2G363408
GRMZM2G135839	Zm00001d039062	GRMZM2G394962
GRMZM2G024612	Zm00001d024771	GRMZM2G109142
GRMZM2G002606	Zm00001d016771	GRMZM2G043193
GRMZM2G411260	Zm00001d020001	GRMZM2G025340
GRMZM2G079468	Zm00001d050830	GRMZM2G372633
AC177936.6_FG008	Zm00001d047781	AC233939.1_FG003
GRMZM2G167031	Zm00001d008716	GRMZM2G162928
GRMZM2G117347	Zm00001d002082	GRMZM2G000093
GRMZM2G083309	Zm00001d038665	GRMZM2G009400
GRMZM5G801793	Zm00001d042667	GRMZM2G091845
GRMZM2G178247	Zm00001d051693	GRMZM2G168431
GRMZM2G054225	Zm00001d022038	GRMZM2G432738
GRMZM5G877077	Zm00001d008691	GRMZM2G143211
GRMZM2G048892	Zm00001d018386	GRMZM5G836910
GRMZM2G447480	Zm00001d026266	GRMZM2G456547
GRMZM2G002548	Zm00001d023470	GRMZM5G839644
GRMZM2G051135	Zm00001d001808	GRMZM2G052178
GRMZM2G092021	Zm00001d047457	GRMZM2G033273
GRMZM2G004468	Zm00001d033148	GRMZM2G110304
GRMZM2G025480	Zm00001d022201	GRMZM2G081857
GRMZM2G358311	Zm00001d038291	GRMZM2G106190
GRMZM2G305362	Zm00001d047463	GRMZM2G170812
GRMZM2G157166	Zm00001d022542	GRMZM2G361847
AC199363.4_FG003	Zm00001d048860	GRMZM2G421495
GRMZM2G146416	Zm00001d013006	GRMZM2G095865
GRMZM2G479045	Zm00001d038823	GRMZM2G310739
GRMZM2G180335	Zm00001d017937	GRMZM2G042027
GRMZM2G095689	Zm00001d021896	GRMZM2G443843
GRMZM2G082504	Zm00001d043900	GRMZM2G080499
GRMZM2G158901	Zm00001d039173	GRMZM2G070659
GRMZM2G093945	Zm00001d023269	GRMZM2G180262
GRMZM2G033671	Zm00001d010490	GRMZM2G084489
GRMZM2G139533	Zm00001d023337	GRMZM2G387731
GRMZM2G039280	Zm00001d013240	GRMZM2G089696
GRMZM2G154621	Zm00001d025380	GRMZM2G059110
GRMZM2G020016	Zm00001d053743	GRMZM2G150190
GRMZM2G118022	Zm00001d053736	GRMZM2G062716
GRMZM2G477491	Zm00001d037941	GRMZM2G085964
AC234199.1_FG003	Zm00001d018060	GRMZM2G116981
GRMZM2G050193	Zm00001d046530	GRMZM2G056093
GRMZM5G869993	Zm00001d007187	GRMZM2G003409
GRMZM2G310505	Zm00001d013977	GRMZM2G163374
GRMZM2G073578	Zm00001d041861	AC196170.2_FG003
GRMZM2G009849	Zm00001d041962	GRMZM6G161711
GRMZM2G003732	Zm00001d028307	GRMZM2G122543
GRMZM2G416498	Zm00001d047392	GRMZM2G331154
GRMZM2G167283	Zm00001d019356	GRMZM2G038388
GRMZM2G318956	Zm00001d016465	GRMZM2G115257
GRMZM2G085604	Zm00001d018801	GRMZM2G031504
GRMZM2G046782	Zm00001d031227	GRMZM2G169451
GRMZM2G388253	Zm00001d022460	GRMZM2G025182
GRMZM2G302195	Zm00001d013781	GRMZM2G086763
GRMZM2G181030	Zm00001d001879	GRMZM2G078274
GRMZM2G037630	Zm00001d031323	GRMZM2G080652
GRMZM2G071370	Zm00001d028988	GRMZM2G107481
GRMZM5G825192	Zm00001d042341	GRMZM2G044460
GRMZM2G001033	Zm00001d005140	GRMZM2G102242
GRMZM2G306482	Zm00001d034795	AC217358.3_FG005
GRMZM2G398198	Zm00001d043898	GRMZM2G062121
GRMZM2G166616	Zm00001d006283	GRMZM2G156470
GRMZM2G504906	Zm00001d029263	GRMZM2G073401
GRMZM2G144997	Zm00001d029320	GRMZM2G127138
GRMZM2G056661	Zm00001d029319	GRMZM2G127138
GRMZM2G154883	Zm00001d040988	GRMZM2G145201
GRMZM2G311500	Zm00001d049853	GRMZM2G095631
GRMZM2G373175	Zm00001d042500	GRMZM2G346132
AC218972.3_FG004	Zm00001d032485	GRMZM2G063679
GRMZM2G049088	Zm00001d015014	GRMZM2G005680
GRMZM2G171096	Zm00001d024750	AC205413.4_FG002
GRMZM2G173852	Zm00001d040019	GRMZM2G162709
GRMZM2G152319	Zm00001d047829	GRMZM2G145313
GRMZM2G086897	Zm00001d019365	GRMZM2G374213
GRMZM2G106105	Zm00001d048431	GRMZM2G115674
GRMZM2G135236	Zm00001d018522	GRMZM2G013890
GRMZM2G041930	Zm00001d012654	GRMZM2G079468
GRMZM2G052093	Zm00001d005812	AC190999.2_FG004
GRMZM2G173641	Zm00001d008367	GRMZM2G058681
GRMZM2G008638	Zm00001d048034	GRMZM2G057590
GRMZM2G168629	Zm00001d012573	GRMZM2G138698
GRMZM2G076303	Zm00001d046137	AC198414.2_FG001
GRMZM2G388703	Zm00001d006286	GRMZM2G049613
GRMZM2G039113	Zm00001d002396	GRMZM2G140328
GRMZM2G005732	Zm00001d028730	GRMZM2G107731
GRMZM2G151204	Zm00001d028728	GRMZM2G107731
GRMZM2G098496	Zm00001d043145	GRMZM2G036099
GRMZM2G132857	Zm00001d043144	GRMZM2G036099
GRMZM2G022921	Zm00001d047470	GRMZM5G845782
GRMZM5G894564	Zm00001d034170	GRMZM2G353114
AC210303.3_FG001	Zm00001d034169	GRMZM2G353114
AC198481.3_FG004	Zm00001d034171	GRMZM2G353114
GRMZM2G033130	Zm00001d040757	GRMZM2G081012
GRMZM2G102181	Zm00001d038484	AC214817.3_FG007
GRMZM2G117776	Zm00001d007227	GRMZM2G129232
GRMZM2G057567	Zm00001d007858	GRMZM2G016236
GRMZM2G161087	Zm00001d009103	GRMZM2G053503
GRMZM5G806257	Zm00001d029008	GRMZM2G423851
GRMZM5G870572	Zm00001d021566	GRMZM2G163138
GRMZM2G467391	Zm00001d009063	GRMZM2G125731
GRMZM2G541193	Zm00001d020825	GRMZM5G851929
GRMZM2G329177	Zm00001d026635	GRMZM2G173413
AC203430.3_FG007	Zm00001d037413	GRMZM2G101874
GRMZM2G135256	Zm00001d022527	AC155434.2_FG004
GRMZM2G059937	Zm00001d001827	GRMZM2G084252
GRMZM2G431251	Zm00001d021070	GRMZM2G128121
GRMZM2G153333	Zm00001d045344	GRMZM2G003289
AC203424.3_FG001	Zm00001d039859	GRMZM2G099340
GRMZM2G110306	Zm00001d016139	GRMZM2G098925
GRMZM2G116314	Zm00001d022002	AC185108.3_FG011
GRMZM2G021921	Zm00001d012981	GRMZM2G410865
GRMZM2G069807	Zm00001d009230	GRMZM2G099231
GRMZM2G054070	Zm00001d038476	GRMZM2G361064
GRMZM2G428242	Zm00001d025545	GRMZM2G136344
GRMZM2G456570	Zm00001d048832	GRMZM2G453672
GRMZM2G104255	Zm00001d051367	GRMZM2G037334
GRMZM2G152451	Zm00001d025887	GRMZM5G893444
GRMZM2G009683	Zm00001d009727	GRMZM2G338696
GRMZM2G169382	Zm00001d007164	GRMZM2G008444
GRMZM2G128176	Zm00001d028412	GRMZM2G165944
GRMZM2G063426	Zm00001d027557	GRMZM2G475059
GRMZM2G415022	Zm00001d031678	GRMZM2G033828
GRMZM2G049588	Zm00001d003202	GRMZM2G477632
GRMZM2G703821	Zm00001d043649	GRMZM2G054221
GRMZM2G340342	Zm00001d007301	GRMZM2G163421
GRMZM5G808350	Zm00001d007637	GRMZM2G037077
GRMZM2G049525	Zm00001d043406	GRMZM2G105863
GRMZM2G465987	Zm00001d036739	GRMZM2G158668
GRMZM5G846198	Zm00001d020256	GRMZM2G085604
GRMZM2G028110	Zm00001d016873	GRMZM5G839518
GRMZM5G854655	Zm00001d039711	GRMZM5G858165
AC155496.2_FG009	Zm00001d037086	GRMZM2G168249
GRMZM2G393062	Zm00001d022258	GRMZM2G160569
GRMZM2G112309	Zm00001d041639	GRMZM2G162119
GRMZM5G882364	Zm00001d032358	AC217977.3_FG001
GRMZM5G829563	Zm00001d024800	GRMZM2G016462
GRMZM2G473138	Zm00001d027801	GRMZM2G470438
GRMZM2G454514	Zm00001d034519	GRMZM2G062357
GRMZM2G030422	Zm00001d014598	GRMZM2G177894
GRMZM2G009400	Zm00001d007599	GRMZM2G445163
GRMZM2G095348	Zm00001d031666	GRMZM2G020631
GRMZM2G055020	Zm00001d008236	GRMZM2G052875
GRMZM2G159691	Zm00001d001846	GRMZM2G044096
GRMZM2G131482	Zm00001d023825	GRMZM2G058612
GRMZM2G329864	Zm00001d043650	GRMZM2G054115
GRMZM2G002765	Zm00001d006573	GRMZM5G821988
GRMZM2G144971	Zm00001d016616	GRMZM2G016434
GRMZM2G106974	Zm00001d036579	GRMZM2G362785
GRMZM2G306679	Zm00001d043745	GRMZM2G420334
GRMZM2G141258	Zm00001d025171	GRMZM2G097662
GRMZM2G078541	Zm00001d037605	AC194965.4_FG004
GRMZM2G421829	Zm00001d019852	GRMZM2G179424
AC199315.4_FG001	Zm00001d044170	GRMZM2G089351
GRMZM5G857930	Zm00001d043945	GRMZM2G024348
GRMZM2G410831	Zm00001d042338	GRMZM2G129155
GRMZM2G115701	Zm00001d009676	GRMZM5G842508
GRMZM2G144197	Zm00001d040466	GRMZM2G162453
GRMZM2G414043	Zm00001d028749	AC208436.3_FG007
GRMZM2G144166	Zm00001d036351	GRMZM2G430680
GRMZM2G004932	Zm00001d016446	GRMZM2G098298
GRMZM2G472226	Zm00001d022268	GRMZM2G427090
GRMZM2G078283	Zm00001d035178	GRMZM2G384884
GRMZM2G007981	Zm00001d052260	GRMZM2G166940
GRMZM5G821988	Zm00001d032096	GRMZM5G866423
GRMZM2G178038	Zm00001d039870	GRMZM2G100889
GRMZM2G048276	Zm00001d032495	AC212023.4_FG004
GRMZM2G015409	Zm00001d017195	GRMZM2G443548
GRMZM2G148586	Zm00001d034553	GRMZM2G111642
GRMZM2G312438	Zm00001d003064	GRMZM2G048295
GRMZM2G018943	Zm00001d029444	GRMZM2G095411
GRMZM2G083689	Zm00001d037624	GRMZM2G092244
GRMZM2G010037	Zm00001d013753	GRMZM2G178351
GRMZM2G143591	Zm00001d012220	GRMZM2G020957
GRMZM2G054470	Zm00001d022036	GRMZM2G049882
GRMZM2G312365	Zm00001d033079	GRMZM2G105189
GRMZM2G325643	Zm00001d008478	GRMZM5G825193
GRMZM5G839512	Zm00001d008479	GRMZM5G825193
GRMZM2G378836	Zm00001d023779	GRMZM2G181227
GRMZM2G042231	Zm00001d038365	GRMZM2G059314
GRMZM2G019266	Zm00001d006929	GRMZM2G141510
GRMZM2G090887	Zm00001d017380	GRMZM2G170016
GRMZM2G006399	Zm00001d042468	GRMZM2G006452
GRMZM2G012126	Zm00001d008322	GRMZM2G036837
GRMZM2G141503	Zm00001d021656	GRMZM2G122687
AC199487.4_FG003	Zm00001d041353	GRMZM5G877336
GRMZM2G356404	Zm00001d002042	GRMZM2G443885
GRMZM2G475349	Zm00001d053158	GRMZM2G116376
GRMZM2G335287	Zm00001d017696	GRMZM2G076562
GRMZM2G047995	Zm00001d030863	GRMZM2G546081
GRMZM2G446872	Zm00001d043914	GRMZM2G002548
GRMZM2G313553	Zm00001d052157	GRMZM2G060554
GRMZM2G168337	Zm00001d037243	AC202439.3_FG001
GRMZM2G435049	Zm00001d022473	GRMZM2G414460
AC231747.1_FG001	Zm00001d005403	GRMZM2G504910
GRMZM2G368126	Zm00001d013041	GRMZM2G318346
GRMZM2G034362	Zm00001d042244	GRMZM2G084779
GRMZM2G039996	Zm00001d041403	GRMZM2G157825
AC205057.3_FG002	Zm00001d001857	GRMZM2G039996
GRMZM2G075992	Zm00001d039668	GRMZM2G054410
GRMZM2G445783	Zm00001d041620	GRMZM2G122999
GRMZM2G459142	Zm00001d008199	GRMZM2G400497
GRMZM2G351074	Zm00001d008502	GRMZM2G003861
GRMZM2G481668	Zm00001d036792	GRMZM2G082118
GRMZM2G420432	Zm00001d009847	GRMZM2G130010
GRMZM2G328309	Zm00001d038518	GRMZM2G037286
GRMZM2G401869	Zm00001d025200	GRMZM2G399530
GRMZM2G335685	Zm00001d044704	GRMZM2G092021
GRMZM2G163141	Zm00001d022391	GRMZM2G036113
GRMZM2G091143	Zm00001d026319	GRMZM2G028902
GRMZM2G473533	Zm00001d017976	GRMZM2G151204
GRMZM2G034015	Zm00001d007686	GRMZM2G152290
GRMZM2G139360	Zm00001d048102	GRMZM2G100511
GRMZM2G302701	Zm00001d028505	GRMZM2G105362
GRMZM2G300771	Zm00001d027319	GRMZM2G085827
GRMZM2G086484	Zm00001d019150	GRMZM2G125918
GRMZM2G389094	Zm00001d038340	GRMZM2G066153
GRMZM2G449163	Zm00001d041267	GRMZM2G135599
GRMZM2G449355	Zm00001d024969	GRMZM2G084054
GRMZM2G129155	Zm00001d015806	AC194937.3_FG004
GRMZM2G124863	Zm00001d037346	GRMZM2G467799
GRMZM2G408305	Zm00001d022618	GRMZM2G032562
GRMZM2G003947	Zm00001d002591	GRMZM2G164378
GRMZM2G428391	Zm00001d014911	GRMZM2G076392
GRMZM2G037286	Zm00001d024199	GRMZM2G365319
GRMZM2G390400	Zm00001d016487	GRMZM2G366698
GRMZM2G057467	Zm00001d005165	GRMZM2G180876
AC200725.4_FG003	Zm00001d011895	GRMZM2G028685
GRMZM5G819452	Zm00001d028429	GRMZM2G102347
GRMZM2G093316	Zm00001d011349	GRMZM2G050270
GRMZM2G574534	Zm00001d026278	GRMZM2G031586
GRMZM2G356618	Zm00001d025951	GRMZM2G054418
GRMZM2G356579	Zm00001d039278	GRMZM2G011636
GRMZM2G103465	Zm00001d021000	GRMZM2G000288
GRMZM2G021202	Zm00001d047719	AC206223.3_FG006
GRMZM2G177984	Zm00001d001897	GRMZM2G107187
AC233939.1_FG003	Zm00001d050800	GRMZM2G054109
GRMZM2G069726	Zm00001d024807	GRMZM2G089484
GRMZM2G065021	Zm00001d034690	GRMZM2G177438
GRMZM2G428216	Zm00001d034691	GRMZM2G177438
GRMZM2G170289	Zm00001d040159	GRMZM2G115352
GRMZM5G853479	Zm00001d027585	GRMZM2G157510
GRMZM2G028794	Zm00001d053375	GRMZM2G413193
GRMZM2G303147	Zm00001d042135	GRMZM2G116554
GRMZM2G158831	Zm00001d044036	GRMZM2G058655
GRMZM2G519736	Zm00001d035342	GRMZM2G001924
GRMZM2G075039	Zm00001d013063	GRMZM2G123063
GRMZM2G078368	Zm00001d037859	GRMZM2G059991
GRMZM2G113473	Zm00001d044124	GRMZM2G114048
GRMZM2G091980	Zm00001d042758	GRMZM5G832473
GRMZM2G023638	Zm00001d016103	AC214771.3_FG003
GRMZM5G844094	Zm00001d043574	GRMZM2G059700
AC230020.1_FG006	Zm00001d036455	GRMZM2G082823
GRMZM2G096348	Zm00001d015212	GRMZM2G319573
GRMZM2G007909	Zm00001d044520	GRMZM2G001981
GRMZM2G177914	Zm00001d010360	GRMZM2G359924
GRMZM2G442215	Zm00001d042753	GRMZM2G133311
GRMZM2G105834	Zm00001d040094	GRMZM2G426917
GRMZM2G152549	Zm00001d025325	GRMZM2G138937
GRMZM2G172523	Zm00001d052880	GRMZM2G330455
GRMZM2G133716	Zm00001d009359	GRMZM2G053574
GRMZM2G168375	Zm00001d038698	GRMZM2G441325
GRMZM2G056799	Zm00001d026047	GRMZM2G086403
GRMZM2G054410	Zm00001d016934	GRMZM2G056629
GRMZM2G073223	Zm00001d050355	GRMZM2G040263
GRMZM2G067583	Zm00001d050039	GRMZM2G048826
GRMZM2G166027	Zm00001d048236	GRMZM2G433117
GRMZM2G451314	Zm00001d008517	GRMZM2G030384
GRMZM2G009462	Zm00001d002742	GRMZM2G101181
GRMZM2G110504	Zm00001d050199	GRMZM2G167875
GRMZM2G006830	Zm00001d010406	GRMZM2G021069
GRMZM2G138698	Zm00001d043815	GRMZM2G019437
AC191317.3_FG009	Zm00001d042812	GRMZM2G177518
GRMZM2G326263	Zm00001d036261	AC210596.3_FG004
GRMZM5G822100	Zm00001d014912	GRMZM2G034143
GRMZM2G409635	Zm00001d022111	GRMZM2G093902
GRMZM2G063717	Zm00001d025712	GRMZM2G039600
GRMZM2G100102	Zm00001d028424	GRMZM2G170532
GRMZM2G557158	Zm00001d007490	GRMZM2G135314
GRMZM2G004835	Zm00001d032670	GRMZM2G131715
GRMZM2G118309	Zm00001d041647	GRMZM5G839757
GRMZM2G004732	Zm00001d022619	GRMZM2G133819
GRMZM2G103266	Zm00001d042094	GRMZM2G066005
GRMZM2G065215	Zm00001d018685	GRMZM2G026083
GRMZM2G092776	Zm00001d006525	GRMZM2G475265
GRMZM2G050825	Zm00001d036425	GRMZM2G139073
GRMZM2G147775	Zm00001d017807	GRMZM2G009426
GRMZM2G111637	Zm00001d052605	GRMZM2G013302
GRMZM2G450939	Zm00001d026020	GRMZM2G097848
GRMZM5G839416	Zm00001d009570	GRMZM2G031827
GRMZM2G161587	Zm00001d017243	GRMZM2G027697
GRMZM5G839644	Zm00001d029055	GRMZM2G028132
GRMZM2G095868	Zm00001d049413	GRMZM2G125151
GRMZM2G161447	Zm00001d012212	GRMZM2G049418
GRMZM2G020514	Zm00001d037242	AC202439.3_FG006
GRMZM5G838388	Zm00001d011467	GRMZM2G154508
GRMZM2G180054	Zm00001d010113	GRMZM2G100102
GRMZM2G303995	Zm00001d032132	GRMZM2G389567
GRMZM2G375504	Zm00001d023222	GRMZM2G057441
GRMZM2G166024	Zm00001d047455	GRMZM2G033592
GRMZM2G108166	Zm00001d005037	GRMZM2G460138
GRMZM2G124671	Zm00001d034095	GRMZM2G118809
GRMZM2G043295	Zm00001d045894	GRMZM2G082962
GRMZM2G390641	Zm00001d044931	GRMZM5G887716
GRMZM2G424857	Zm00001d051161	GRMZM2G160541
GRMZM2G117956	Zm00001d052230	GRMZM2G134104
GRMZM2G146355	Zm00001d049438	GRMZM2G170857
GRMZM2G077842	Zm00001d021362	GRMZM2G096709
GRMZM2G448330	Zm00001d014682	GRMZM2G330012
GRMZM2G421212	Zm00001d011233	GRMZM2G470292
GRMZM2G003289	Zm00001d033927	AC190915.3_FG007
GRMZM2G180876	Zm00001d048702	GRMZM2G167549
GRMZM2G089944	Zm00001d024764	GRMZM2G028014
GRMZM2G479245	Zm00001d011758	GRMZM2G025966
GRMZM2G148807	Zm00001d043975	GRMZM5G802854
GRMZM2G064710	Zm00001d023385	GRMZM2G031261
GRMZM2G432266	Zm00001d038142	GRMZM2G022252
GRMZM2G480050	Zm00001d031810	GRMZM2G117347
GRMZM2G163440	Zm00001d043775	GRMZM2G466139
GRMZM2G157510	Zm00001d009068	GRMZM2G367001
GRMZM2G123362	Zm00001d005423	GRMZM2G322661
GRMZM2G086450	Zm00001d005424	GRMZM2G322661
GRMZM2G057329	Zm00001d009156	GRMZM2G003417
GRMZM2G162127	Zm00001d044005	GRMZM2G432918
GRMZM2G056081	Zm00001d013906	GRMZM2G086450
GRMZM2G350819	Zm00001d032188	GRMZM2G108600
GRMZM5G869762	Zm00001d008853	GRMZM2G333582
GRMZM2G012044	Zm00001d033854	AC211401.4_FG003
GRMZM5G865112	Zm00001d032632	GRMZM2G071304
GRMZM2G098088	Zm00001d049692	GRMZM2G105387
GRMZM2G142735	Zm00001d031009	GRMZM2G067436
GRMZM2G128969	Zm00001d048234	GRMZM2G095689
GRMZM2G406378	Zm00001d026542	GRMZM2G124495
GRMZM2G024958	Zm00001d021491	GRMZM2G397557
GRMZM5G825090	Zm00001d036919	GRMZM2G079308
GRMZM2G053882	Zm00001d037273	GRMZM2G025322
GRMZM2G108530	Zm00001d041857	GRMZM2G117776
GRMZM2G058681	Zm00001d048802	GRMZM2G058447
GRMZM2G038848	Zm00001d015205	GRMZM2G109070
GRMZM2G417082	Zm00001d011405	GRMZM2G132686
GRMZM2G098721	Zm00001d036834	GRMZM2G171028
GRMZM2G036629	Zm00001d050024	AC192367.2_FG002
GRMZM2G169548	Zm00001d041678	GRMZM2G064015
GRMZM2G066615	Zm00001d037035	GRMZM2G129375
GRMZM2G131539	Zm00001d048110	GRMZM2G113473
GRMZM2G414460	Zm00001d021897	GRMZM2G443829
AC155434.2_FG001	Zm00001d033091	GRMZM2G011269
GRMZM2G054591	Zm00001d042799	GRMZM2G053801
GRMZM2G517408	Zm00001d024595	GRMZM2G077317
GRMZM2G136389	Zm00001d042626	GRMZM2G467466
GRMZM2G139994	Zm00001d040649	GRMZM2G119864
GRMZM2G091581	Zm00001d051507	GRMZM2G178758
GRMZM2G702681	Zm00001d035659	GRMZM2G430807
GRMZM2G154278	Zm00001d028203	GRMZM2G103079
GRMZM5G815808	Zm00001d005856	GRMZM2G134502
GRMZM2G372812	Zm00001d032615	GRMZM5G888696
GRMZM2G137546	Zm00001d014665	GRMZM2G099452
GRMZM2G080507	Zm00001d005439	GRMZM2G333478
GRMZM2G700211	Zm00001d006680	AC194970.5_FG009
GRMZM2G060943	Zm00001d046935	GRMZM2G103897
GRMZM2G137713	Zm00001d021273	GRMZM5G899476
GRMZM2G018314	Zm00001d016834	GRMZM2G128146
GRMZM2G110304	Zm00001d021218	GRMZM2G389094
GRMZM2G032244	Zm00001d021217	GRMZM2G389094
GRMZM2G400596	Zm00001d026036	GRMZM2G086553
GRMZM2G445163	Zm00001d051442	GRMZM2G394528
GRMZM2G019515	Zm00001d039618	GRMZM2G115574
GRMZM2G065344	Zm00001d039745	GRMZM2G003096
GRMZM2G126002	Zm00001d047705	GRMZM2G057959
GRMZM2G145045	Zm00001d007904	GRMZM5G864266
GRMZM2G179336	Zm00001d030732	GRMZM2G092652
GRMZM2G149273	Zm00001d044540	GRMZM2G066101
GRMZM2G005622	Zm00001d035031	GRMZM2G552322
GRMZM2G477632	Zm00001d050081	GRMZM2G175474
GRMZM2G443560	Zm00001d006285	GRMZM2G151656
GRMZM5G868120	Zm00001d041776	GRMZM2G076946
GRMZM2G452695	Zm00001d012831	GRMZM2G083346
GRMZM2G100372	Zm00001d022152	GRMZM2G053999
GRMZM2G320259	Zm00001d043751	GRMZM2G083850
GRMZM2G008730	Zm00001d052143	GRMZM2G300624
GRMZM2G156348	Zm00001d008396	GRMZM2G128518
GRMZM2G085381	Zm00001d043854	GRMZM2G077401
GRMZM2G103119	Zm00001d024390	GRMZM2G700828
GRMZM2G502467	Zm00001d047998	GRMZM2G105787
AC205567.3_FG002	Zm00001d005981	GRMZM2G048008
GRMZM5G876960	Zm00001d003463	GRMZM2G071704
GRMZM2G032706	Zm00001d044186	GRMZM2G377539
GRMZM2G545326	Zm00001d047683	GRMZM5G830983
GRMZM2G157132	Zm00001d042800	GRMZM2G053869
GRMZM2G112609	Zm00001d043726	GRMZM2G162145
GRMZM2G079342	Zm00001d049888	GRMZM2G051311
GRMZM2G102786	Zm00001d021867	GRMZM2G122841
GRMZM2G173372	Zm00001d029448	GRMZM2G117513
GRMZM2G118082	Zm00001d026260	GRMZM2G057698
GRMZM2G545336	Zm00001d032550	GRMZM2G131591
GRMZM2G092174	Zm00001d002072	GRMZM2G400965
GRMZM2G152815	Zm00001d002834	GRMZM2G003769
GRMZM2G455321	Zm00001d014600	GRMZM2G142093
GRMZM2G046894	Zm00001d002020	GRMZM2G059740
GRMZM2G146913	Zm00001d047119	AC234161.1_FG010
GRMZM2G038898	Zm00001d024512	GRMZM2G068808
GRMZM2G074066	Zm00001d018133	GRMZM2G313027
GRMZM2G143187	Zm00001d033496	GRMZM2G478568
GRMZM2G013038	Zm00001d019613	GRMZM2G177424
GRMZM2G370999	Zm00001d005381	GRMZM2G070761
GRMZM2G180060	Zm00001d013643	AC191676.3_FG011
GRMZM2G310758	Zm00001d044970	GRMZM2G070315
GRMZM2G091233	Zm00001d033274	GRMZM2G366584
GRMZM2G067080	Zm00001d028827	GRMZM2G076537
GRMZM2G138303	Zm00001d024220	GRMZM2G004732
GRMZM2G382393	Zm00001d038205	GRMZM5G881803
GRMZM5G854604	Zm00001d046332	GRMZM2G098988
GRMZM2G117796	Zm00001d005392	GRMZM2G352855
GRMZM2G347717	Zm00001d037540	GRMZM2G084812
GRMZM2G165355	Zm00001d027346	GRMZM2G077769
GRMZM2G159171	Zm00001d039608	GRMZM2G363535
GRMZM2G427031	Zm00001d026076	GRMZM2G006212
GRMZM2G030263	Zm00001d025823	GRMZM2G410083
GRMZM2G102657	Zm00001d052853	GRMZM2G071347
GRMZM2G403190	Zm00001d022238	GRMZM2G158885
GRMZM5G841684	Zm00001d028992	GRMZM2G102365
GRMZM2G176962	Zm00001d007191	GRMZM2G176327
GRMZM2G116140	Zm00001d006422	GRMZM2G173416
GRMZM2G483889	Zm00001d052666	GRMZM2G153150
GRMZM2G171736	Zm00001d042910	GRMZM2G081919
GRMZM5G877336	Zm00001d026193	GRMZM2G128057
GRMZM5G876973	Zm00001d034842	GRMZM2G123843
GRMZM2G422303	Zm00001d035162	GRMZM2G127328
GRMZM2G404682	Zm00001d040467	GRMZM2G162369
AC183950.2_FG005	Zm00001d032858	GRMZM2G016922
GRMZM5G892642	Zm00001d051029	AC198324.3_FG003
GRMZM2G362785	Zm00001d002014	GRMZM2G334734
GRMZM2G102218	Zm00001d039083	GRMZM2G163283
GRMZM6G220418	Zm00001d045359	GRMZM2G400470
GRMZM2G428628	Zm00001d039878	GRMZM2G384090
GRMZM2G027378	Zm00001d014948	GRMZM2G023638
GRMZM2G385851	Zm00001d045575	GRMZM2G168143
GRMZM5G869840	Zm00001d002455	GRMZM2G463267
GRMZM2G313833	Zm00001d019430	GRMZM2G169914
GRMZM2G151992	Zm00001d016471	GRMZM2G028677
GRMZM2G044788	Zm00001d038063	GRMZM2G176495
AC225308.2_FG005	Zm00001d024185	GRMZM2G459370
GRMZM2G083346	Zm00001d012036	GRMZM5G875238
GRMZM2G176209	Zm00001d027742	GRMZM2G472266
GRMZM2G409724	Zm00001d046035	GRMZM2G097934
GRMZM2G143211	Zm00001d041186	GRMZM2G017835
GRMZM2G412229	Zm00001d051556	GRMZM2G110192
GRMZM2G093766	Zm00001d028912	GRMZM2G089720
GRMZM2G129175	Zm00001d018756	GRMZM2G426154
AC232238.2_FG008	Zm00001d030157	GRMZM2G011518
GRMZM2G143625	Zm00001d020674	GRMZM2G088964
GRMZM2G329532	Zm00001d005001	GRMZM2G141081
GRMZM2G014055	Zm00001d011447	GRMZM2G034025
GRMZM2G036759	Zm00001d021172	GRMZM2G435015
GRMZM2G051458	Zm00001d014699	GRMZM2G083515
GRMZM2G153863	Zm00001d040831	GRMZM2G010085
GRMZM2G066885	Zm00001d006117	GRMZM2G158775
GRMZM2G113039	Zm00001d002902	GRMZM2G108077
AC199571.3_FG001	Zm00001d021666	GRMZM2G056369
GRMZM2G350399	Zm00001d028140	AC205725.3_FG010
GRMZM2G417859	Zm00001d019960	AC202110.3_FG004
GRMZM2G148892	Zm00001d021977	GRMZM2G010702
GRMZM5G842645	Zm00001d046628	GRMZM2G141241
GRMZM2G343449	Zm00001d034723	GRMZM2G340257
GRMZM2G000614	Zm00001d039461	GRMZM2G068322
GRMZM2G446921	Zm00001d042712	GRMZM2G141185
GRMZM2G469414	Zm00001d025407	GRMZM2G175549
GRMZM2G137233	Zm00001d025199	GRMZM2G090441
GRMZM2G358236	Zm00001d012101	GRMZM2G065893
GRMZM2G019689	Zm00001d048841	GRMZM2G154523
GRMZM2G046574	Zm00001d021519	GRMZM5G802881
GRMZM2G065154	Zm00001d041850	GRMZM2G090723
GRMZM2G109152	Zm00001d007932	AC199068.2_FG017
GRMZM5G881824	Zm00001d033386	GRMZM2G149028
GRMZM2G094028	Zm00001d008548	GRMZM2G156632
GRMZM2G356260	Zm00001d008273	GRMZM2G029243
GRMZM2G179550	Zm00001d027279	GRMZM2G367714
GRMZM2G129482	Zm00001d048671	GRMZM2G001169
GRMZM2G057056	Zm00001d049115	GRMZM2G483275
GRMZM2G155512	Zm00001d053453	GRMZM2G074122
GRMZM2G020450	Zm00001d008926	AC187263.4_FG001
GRMZM2G093157	Zm00001d045139	GRMZM2G014240
GRMZM2G007256	Zm00001d048637	GRMZM2G455321
GRMZM2G427451	Zm00001d046136	GRMZM2G469898
GRMZM2G085320	Zm00001d049421	GRMZM2G093606
GRMZM2G065171	Zm00001d019325	GRMZM2G390876
GRMZM2G128648	Zm00001d037650	GRMZM2G002656
GRMZM2G115152	Zm00001d003106	GRMZM2G352129
GRMZM2G096458	Zm00001d017707	GRMZM2G067242
GRMZM2G527250	Zm00001d008299	GRMZM2G041308
GRMZM2G035134	Zm00001d027480	GRMZM2G032852
GRMZM2G064558	Zm00001d032973	GRMZM2G064590
GRMZM2G059282	Zm00001d012652	GRMZM2G079257
GRMZM2G031613	Zm00001d047192	GRMZM2G093092
GRMZM2G115352	Zm00001d028173	GRMZM2G032423
GRMZM2G112129	Zm00001d030796	GRMZM2G429759
GRMZM2G338721	Zm00001d028103	GRMZM2G055101
GRMZM2G024293	Zm00001d051946	GRMZM2G164854
GRMZM2G117632	Zm00001d036541	GRMZM2G150256
GRMZM2G029868	Zm00001d031128	GRMZM2G149751
[truncated: 3,006 more rows]

## Sheet: GRN analysis and zm c up
Group C UP GRN targets	V4 matched Group C UP GRN targets	V3 ID
22198 duplicates, 19345 remaining	Matched ID(s); 17117 mapped to Zm	Requested ID
GRMZM5G824964	Zm00001d034179	GRMZM2G164558
GRMZM2G011615	Zm00001d049736	GRMZM2G059266
GRMZM2G027867	Zm00001d015662	GRMZM2G080129
GRMZM2G009783	Zm00001d017307	GRMZM2G098474
GRMZM2G141208	Zm00001d050514	GRMZM2G068239
GRMZM2G179424	Zm00001d052700	AC215244.3_FG002
GRMZM2G017536	Zm00001d007630	GRMZM2G324860
GRMZM5G887077	Zm00001d003754	GRMZM2G128322
AC204530.4_FG002	Zm00001d041319	GRMZM5G858784
GRMZM2G041125	Zm00001d036360	GRMZM2G073671
GRMZM2G463726	Zm00001d053371	GRMZM2G068489
GRMZM2G166281	Zm00001d043655	AC207628.4_FG011
GRMZM2G030768	Zm00001d027749	GRMZM2G154211
GRMZM2G121210	Zm00001d032362	GRMZM2G101105
GRMZM2G430680	Zm00001d038699	GRMZM2G140996
GRMZM2G104125	Zm00001d051061	GRMZM2G131487
GRMZM2G181153	Zm00001d034495	GRMZM2G049906
GRMZM2G115825	Zm00001d028812	GRMZM2G113364
AC149818.2_FG004	Zm00001d020628	GRMZM2G431288
GRMZM2G300788	Zm00001d021064	GRMZM5G872141
GRMZM2G157616	Zm00001d040260	EF517601.1_FG016
GRMZM2G378665	Zm00001d038544	GRMZM2G117582
GRMZM2G093217	Zm00001d038545	GRMZM2G117582
GRMZM2G145950	Zm00001d013390	GRMZM2G096591
GRMZM2G300945	Zm00001d047105	GRMZM2G409265
GRMZM2G138886	Zm00001d025860	GRMZM2G005859
GRMZM2G009913	Zm00001d037108	GRMZM2G135498
GRMZM2G010105	Zm00001d015377	GRMZM2G007372
GRMZM2G008764	Zm00001d031445	AC234203.1_FG011
GRMZM2G055037	Zm00001d037550	GRMZM2G450233
GRMZM2G071206	Zm00001d012063	GRMZM2G031338
GRMZM2G176047	Zm00001d006753	GRMZM2G378106
GRMZM2G471186	Zm00001d012693	GRMZM2G437859
GRMZM2G305080	Zm00001d052442	GRMZM2G171702
GRMZM2G055257	Zm00001d039188	GRMZM2G156905
GRMZM2G108418	Zm00001d011204	GRMZM2G116083
GRMZM2G325783	Zm00001d005834	GRMZM2G365515
GRMZM2G326227	Zm00001d039265	GRMZM2G175218
GRMZM2G075780	Zm00001d043653	AC207628.4_FG009
AC213463.3_FG004	Zm00001d003279	GRMZM2G311756
GRMZM2G300624	Zm00001d019696	GRMZM2G107377
GRMZM2G093557	Zm00001d042325	GRMZM2G030038
GRMZM2G020974	Zm00001d039926	GRMZM5G832149
GRMZM5G889644	Zm00001d042343	GRMZM2G044581
GRMZM2G005840	Zm00001d032539	GRMZM2G374973
GRMZM2G301194	Zm00001d003812	GRMZM2G412524
GRMZM2G130351	Zm00001d051451	GRMZM2G000520
GRMZM2G394962	Zm00001d016463	GRMZM2G027886
GRMZM2G026346	Zm00001d016674	GRMZM2G059851
GRMZM5G819523	Zm00001d008425	GRMZM2G322047
GRMZM2G148211	Zm00001d037005	GRMZM2G403076
GRMZM2G102616	Zm00001d043240	GRMZM2G116670
GRMZM2G165755	Zm00001d034073	GRMZM2G143204
GRMZM2G436084	Zm00001d015765	GRMZM5G877874
GRMZM5G884544	Zm00001d006316	AC233910.1_FG002
GRMZM2G014069	Zm00001d003534	GRMZM2G105542
GRMZM2G004924	Zm00001d030051	GRMZM2G033876
GRMZM2G428555	Zm00001d028112	GRMZM2G007188
GRMZM2G118241	Zm00001d036092	GRMZM2G103166
GRMZM2G317487	Zm00001d035766	GRMZM2G156881
GRMZM2G019404	Zm00001d043724	GRMZM2G034975
GRMZM2G440009	Zm00001d003749	AC233887.1_FG005
GRMZM2G139920	Zm00001d011168	GRMZM2G064885
GRMZM2G064852	Zm00001d003269	GRMZM2G022255
GRMZM2G069025	Zm00001d038734	GRMZM2G331833
GRMZM2G096008	Zm00001d007462	GRMZM2G139813
GRMZM5G817395	Zm00001d016348	GRMZM2G467391
GRMZM2G132358	Zm00001d028835	GRMZM5G807260
GRMZM2G106056	Zm00001d025639	GRMZM2G057437
GRMZM2G120440	Zm00001d037036	GRMZM2G129783
GRMZM2G085266	Zm00001d016129	GRMZM2G055754
GRMZM2G376282	Zm00001d036520	GRMZM2G100955
GRMZM2G081445	Zm00001d016248	GRMZM2G135588
GRMZM2G062471	Zm00001d028034	GRMZM5G808775
GRMZM2G086766	Zm00001d031315	GRMZM2G113726
AC207265.3_FG002	Zm00001d052624	GRMZM2G134313
GRMZM2G154904	Zm00001d048544	GRMZM5G875564
GRMZM2G153358	Zm00001d053557	GRMZM2G410293
GRMZM2G320689	Zm00001d010614	GRMZM5G827266
GRMZM2G462623	Zm00001d051692	GRMZM2G141036
GRMZM6G790713	Zm00001d017976	GRMZM2G151204
GRMZM2G136838	Zm00001d031873	GRMZM2G328309
GRMZM2G136910	Zm00001d004154	GRMZM2G453879
GRMZM2G174610	Zm00001d049357	GRMZM2G045303
GRMZM2G060253	Zm00001d018278	GRMZM2G095778
GRMZM2G019619	Zm00001d022581	GRMZM2G134396
GRMZM2G148098	Zm00001d019114	GRMZM2G039746
GRMZM2G141472	Zm00001d053706	GRMZM2G146034
GRMZM2G026580	Zm00001d012243	GRMZM2G156206
GRMZM2G154267	Zm00001d004480	GRMZM2G097827
GRMZM2G096184	Zm00001d015341	AC197265.3_FG005
GRMZM2G368827	Zm00001d042534	GRMZM2G109464
GRMZM2G701201	Zm00001d022491	GRMZM2G081639
GRMZM2G104166	Zm00001d049193	GRMZM2G160041
GRMZM2G110140	Zm00001d034855	GRMZM2G023242
GRMZM2G021270	Zm00001d037830	GRMZM2G462625
AY530952.1_FG001	Zm00001d042262	GRMZM2G126266
GRMZM2G143253	Zm00001d048480	GRMZM2G171469
AC204292.4_FG003	Zm00001d044119	GRMZM2G150280
GRMZM2G436981	Zm00001d053049	GRMZM2G046024
GRMZM2G047572	Zm00001d009339	GRMZM2G001755
GRMZM2G124091	Zm00001d028006	GRMZM2G113775
GRMZM5G849149	Zm00001d051458	GRMZM5G835542
GRMZM2G102944	Zm00001d045194	GRMZM2G005080
GRMZM2G003963	Zm00001d031525	GRMZM2G166355
GRMZM2G098828	Zm00001d028642	GRMZM2G096231
GRMZM2G070442	Zm00001d004460	GRMZM2G131597
GRMZM5G881887	Zm00001d004025	GRMZM2G116693
GRMZM2G107609	Zm00001d052630	GRMZM2G423831
GRMZM2G081474	Zm00001d035183	GRMZM2G334584
GRMZM2G400173	Zm00001d043056	GRMZM2G068151
GRMZM2G074083	Zm00001d018853	GRMZM2G006716
GRMZM2G074053	Zm00001d020017	GRMZM2G115773
GRMZM2G123122	Zm00001d044607	GRMZM2G354579
GRMZM2G448001	Zm00001d048898	GRMZM2G092101
GRMZM2G128072	Zm00001d002953	GRMZM2G039711
GRMZM2G083841	Zm00001d041870	GRMZM2G163476
GRMZM2G040095	Zm00001d006169	GRMZM2G124037
GRMZM2G002147	Zm00001d003840	GRMZM2G134235
GRMZM2G143599	Zm00001d008604	GRMZM2G020484
GRMZM2G080487	Zm00001d005875	GRMZM2G366130
GRMZM2G097207	Zm00001d048413	GRMZM2G063435
GRMZM2G042055	Zm00001d027630	GRMZM2G107532
GRMZM2G384516	Zm00001d042843	GRMZM2G449033
GRMZM5G825512	Zm00001d032212	GRMZM2G160560
GRMZM2G136960	Zm00001d022310	GRMZM2G040600
GRMZM2G113089	Zm00001d026248	GRMZM2G140924
GRMZM5G803318	Zm00001d045837	GRMZM2G429442
GRMZM2G114642	Zm00001d032956	GRMZM2G040326
GRMZM2G043783	Zm00001d027649	GRMZM2G062724
GRMZM2G093210	Zm00001d042722	GRMZM5G893764
GRMZM2G115812	Zm00001d011347	GRMZM2G005304
GRMZM2G060290	Zm00001d051156	GRMZM2G135091
GRMZM2G148301	Zm00001d019450	GRMZM2G076417
GRMZM2G179976	Zm00001d014226	GRMZM2G110473
GRMZM2G361659	Zm00001d048737	GRMZM2G006363
GRMZM2G033785	Zm00001d042867	GRMZM2G007928
GRMZM2G127338	Zm00001d046973	GRMZM2G110822
GRMZM2G118697	Zm00001d033874	GRMZM2G137891
GRMZM2G069018	Zm00001d026335	GRMZM2G419694
GRMZM2G416426	Zm00001d032868	GRMZM2G303965
GRMZM2G154332	Zm00001d049143	GRMZM2G148188
GRMZM2G103847	Zm00001d014282	GRMZM2G474555
GRMZM2G081671	Zm00001d010572	GRMZM2G328988
GRMZM2G401664	Zm00001d053569	GRMZM2G070508
GRMZM2G029314	Zm00001d002005	GRMZM2G036297
AC207628.4_FG005	Zm00001d005315	AC210204.3_FG002
GRMZM2G415343	Zm00001d050920	GRMZM2G008748
GRMZM2G000608	Zm00001d037156	GRMZM2G330024
GRMZM2G114113	Zm00001d045604	GRMZM5G805350
GRMZM2G420910	Zm00001d031785	GRMZM2G117250
GRMZM5G868664	Zm00001d028577	GRMZM2G119168
GRMZM2G372200	Zm00001d002341	GRMZM2G045581
GRMZM2G348125	Zm00001d038533	GRMZM2G157596
GRMZM2G051894	Zm00001d010812	AC205471.4_FG003
GRMZM2G128922	Zm00001d018791	GRMZM2G060866
GRMZM2G036619	Zm00001d019600	GRMZM2G139941
GRMZM2G072383	Zm00001d017152	GRMZM2G129189
GRMZM2G179432	Zm00001d052054	GRMZM2G155499
GRMZM2G055968	Zm00001d043991	GRMZM2G070360
GRMZM2G470307	Zm00001d033528	GRMZM2G104542
GRMZM2G000353	Zm00001d006650	GRMZM2G137864
AC231745.1_FG003	Zm00001d026582	GRMZM2G149979
GRMZM2G067298	Zm00001d034067	GRMZM2G328224
GRMZM2G300709	Zm00001d017676	GRMZM2G181273
GRMZM2G445958	Zm00001d004818	GRMZM2G052277
GRMZM2G045808	Zm00001d051016	GRMZM2G138632
AC233922.1_FG008	Zm00001d017832	GRMZM2G480620
GRMZM2G063192	Zm00001d041444	AC203865.3_FG001
GRMZM2G417451	Zm00001d025277	GRMZM2G451179
GRMZM2G075058	Zm00001d043841	GRMZM2G054715
GRMZM2G035928	Zm00001d043411	GRMZM2G022679
GRMZM2G415772	Zm00001d033483	GRMZM2G169372
AC207342.3_FG008	Zm00001d003621	GRMZM2G018223
GRMZM2G166082	Zm00001d024784	GRMZM2G127490
GRMZM2G099960	Zm00001d050277	GRMZM2G166711
GRMZM2G130432	Zm00001d010168	GRMZM2G132868
GRMZM2G112074	Zm00001d002860	GRMZM2G078279
GRMZM2G100478	Zm00001d021616	GRMZM2G049151
GRMZM2G176519	Zm00001d011274	GRMZM2G028134
GRMZM2G464976	Zm00001d032939	GRMZM2G040387
GRMZM2G055469	Zm00001d028282	GRMZM2G002178
GRMZM2G083347	Zm00001d010676	GRMZM2G066158
GRMZM2G139803	Zm00001d006268	GRMZM2G459847
GRMZM2G341058	Zm00001d015213	GRMZM5G805485
GRMZM2G569855	Zm00001d044812	GRMZM2G098643
GRMZM2G099319	Zm00001d024376	GRMZM2G090594
GRMZM2G027499	Zm00001d052027	GRMZM2G111451
GRMZM2G175989	Zm00001d037388	GRMZM2G012992
GRMZM2G113167	Zm00001d034076	GRMZM2G074317
GRMZM2G080503	Zm00001d029165	GRMZM2G378907
GRMZM2G064503	Zm00001d022227	GRMZM2G056407
GRMZM2G363408	Zm00001d046564	GRMZM2G050912
GRMZM2G031568	Zm00001d022403	GRMZM2G009804
GRMZM2G014276	Zm00001d007945	GRMZM2G461569
GRMZM2G076435	Zm00001d002287	GRMZM2G080041
GRMZM2G458164	Zm00001d013144	GRMZM2G130625
AC203307.4_FG001	Zm00001d053926	GRMZM2G423129
GRMZM2G170632	Zm00001d042305	GRMZM2G092214
GRMZM2G172098	Zm00001d016052	GRMZM2G048450
GRMZM2G171469	Zm00001d046105	GRMZM2G114756
GRMZM2G071832	Zm00001d041329	GRMZM2G061629
GRMZM2G114748	Zm00001d012404	AC205326.3_FG002
GRMZM2G164085	Zm00001d012619	GRMZM2G004690
GRMZM2G111906	Zm00001d007836	GRMZM2G469477
GRMZM2G138067	Zm00001d002025	GRMZM2G086573
GRMZM2G422190	Zm00001d017270	GRMZM2G096753
GRMZM2G161534	Zm00001d008249	GRMZM2G589579
GRMZM2G070649	Zm00001d032357	AC217977.3_FG003
GRMZM2G083222	Zm00001d011079	GRMZM2G042789
GRMZM2G082257	Zm00001d010594	GRMZM2G009968
GRMZM2G021921	Zm00001d025057	GRMZM2G415579
GRMZM2G099461	Zm00001d029341	GRMZM2G100452
GRMZM2G099074	Zm00001d046974	GRMZM2G170148
GRMZM5G824137	Zm00001d033572	GRMZM2G063298
GRMZM2G006894	Zm00001d030780	GRMZM2G417410
GRMZM2G007675	Zm00001d030781	GRMZM2G417410
GRMZM2G075505	Zm00001d029814	GRMZM2G113761
GRMZM2G100225	Zm00001d040599	GRMZM2G142836
GRMZM2G420012	Zm00001d050633	GRMZM2G006507
GRMZM2G003068	Zm00001d038091	GRMZM2G054056
GRMZM2G152028	Zm00001d021193	GRMZM2G043445
GRMZM5G873123	Zm00001d042690	GRMZM2G005444
AC225555.3_FG005	Zm00001d052606	GRMZM2G013271
GRMZM2G139822	Zm00001d039260	GRMZM2G087804
GRMZM2G061202	Zm00001d038469	GRMZM2G125037
GRMZM2G030528	Zm00001d031861	GRMZM2G028386
GRMZM2G003379	Zm00001d042372	GRMZM2G153991
GRMZM2G113796	Zm00001d032961	GRMZM2G081554
GRMZM2G114044	Zm00001d023576	GRMZM2G026231
GRMZM2G107309	Zm00001d054006	GRMZM2G074252
GRMZM2G084195	Zm00001d010249	GRMZM2G110739
GRMZM2G026918	Zm00001d032696	GRMZM2G081515
GRMZM2G176028	Zm00001d048684	GRMZM2G106389
GRMZM2G108723	Zm00001d016946	GRMZM2G129929
GRMZM2G145109	Zm00001d048568	GRMZM2G158293
GRMZM2G361652	Zm00001d038297	GRMZM2G000836
GRMZM5G862882	Zm00001d035208	GRMZM2G301803
GRMZM2G156881	Zm00001d051754	GRMZM2G125268
GRMZM2G084486	Zm00001d028362	GRMZM2G100629
GRMZM2G044023	Zm00001d034719	GRMZM2G122045
GRMZM2G152007	Zm00001d046936	GRMZM2G103805
GRMZM2G461447	Zm00001d006416	GRMZM2G158216
GRMZM2G327605	Zm00001d040691	GRMZM2G034855
GRMZM2G178990	Zm00001d030938	GRMZM2G443345
GRMZM2G416322	Zm00001d014035	GRMZM2G368755
GRMZM2G173700	Zm00001d007652	GRMZM2G391164
GRMZM2G348551	Zm00001d029237	GRMZM5G871471
GRMZM2G041876	Zm00001d048456	GRMZM2G172053
GRMZM2G074094	Zm00001d048457	GRMZM2G172053
GRMZM2G309368	Zm00001d021396	GRMZM2G146240
GRMZM2G086934	Zm00001d021395	GRMZM2G146240
GRMZM5G872417	Zm00001d051112	GRMZM2G079817
GRMZM2G467992	Zm00001d037934	GRMZM2G007195
GRMZM2G072529	Zm00001d044700	GRMZM2G152781
AC233960.1_FG003	Zm00001d029758	GRMZM2G040743
GRMZM2G139374	Zm00001d039307	GRMZM2G470305
GRMZM2G052166	Zm00001d033407	GRMZM2G095899
GRMZM2G334857	Zm00001d023373	GRMZM2G003732
GRMZM2G434219	Zm00001d036364	GRMZM2G074358
GRMZM2G422649	Zm00001d005396	GRMZM2G064898
GRMZM2G040389	Zm00001d003380	GRMZM2G107003
GRMZM2G133175	Zm00001d003284	GRMZM2G135396
GRMZM2G021069	Zm00001d040717	GRMZM2G113391
GRMZM2G014577	Zm00001d035029	GRMZM5G834205
GRMZM2G360907	Zm00001d036827	GRMZM2G112337
GRMZM2G365774	Zm00001d051020	GRMZM2G112228
GRMZM2G158520	Zm00001d038570	GRMZM2G041697
GRMZM2G133793	Zm00001d005516	GRMZM2G014106
AC234164.1_FG004	Zm00001d020757	GRMZM2G075837
GRMZM2G167741	Zm00001d012830	GRMZM2G083410
GRMZM2G123246	Zm00001d010209	AC234152.1_FG007
GRMZM2G061043	Zm00001d009475	GRMZM2G171223
GRMZM2G457621	Zm00001d007793	GRMZM2G083000
GRMZM2G148884	Zm00001d045175	GRMZM2G328213
GRMZM2G032878	Zm00001d037663	GRMZM5G886688
GRMZM2G070555	Zm00001d015686	AC197355.3_FG001
GRMZM2G087079	Zm00001d017809	GRMZM2G020040
GRMZM2G495626	Zm00001d048839	GRMZM2G154442
GRMZM2G094051	Zm00001d009484	GRMZM2G022101
GRMZM2G044550	Zm00001d032350	GRMZM2G045688
GRMZM2G017405	Zm00001d005681	GRMZM2G110358
GRMZM2G137077	Zm00001d016461	GRMZM2G386154
GRMZM2G112839	Zm00001d042166	GRMZM2G375956
GRMZM2G052434	Zm00001d043870	GRMZM2G423202
GRMZM2G010306	Zm00001d007180	GRMZM2G031125
GRMZM2G062084	Zm00001d020555	GRMZM2G174099
GRMZM2G155314	Zm00001d036781	GRMZM2G443439
GRMZM2G131243	Zm00001d048796	GRMZM2G468260
GRMZM2G018062	Zm00001d046896	GRMZM2G331766
GRMZM2G513713	Zm00001d014719	GRMZM2G347605
GRMZM2G091543	Zm00001d034475	GRMZM2G164082
GRMZM2G069827	Zm00001d001949	GRMZM2G047321
GRMZM2G575566	Zm00001d015130	GRMZM5G818514
GRMZM2G352248	Zm00001d036482	GRMZM2G114337
GRMZM2G045192	Zm00001d012854	GRMZM2G112015
GRMZM2G128644	Zm00001d014435	GRMZM2G067789
GRMZM2G155911	Zm00001d009152	GRMZM2G066500
GRMZM2G363437	Zm00001d018553	GRMZM2G362341
GRMZM2G002903	Zm00001d003611	GRMZM2G380361
GRMZM2G123920	Zm00001d018521	GRMZM2G013704
GRMZM2G129238	Zm00001d052269	GRMZM2G149184
GRMZM2G039855	Zm00001d025888	GRMZM5G812538
GRMZM2G014034	Zm00001d038288	GRMZM2G091201
GRMZM2G154549	Zm00001d003928	GRMZM2G086267
GRMZM2G127453	Zm00001d027568	GRMZM2G176131
GRMZM2G062524	Zm00001d012206	GRMZM2G068361
AC219006.2_FG007	Zm00001d053749	GRMZM2G433591
GRMZM6G314950	Zm00001d025586	GRMZM2G125233
GRMZM2G059590	Zm00001d041439	GRMZM2G390345
GRMZM2G048085	Zm00001d052749	GRMZM2G125648
GRMZM2G180951	Zm00001d008601	GRMZM2G176568
GRMZM5G804783	Zm00001d011413	GRMZM2G145554
GRMZM2G021642	Zm00001d004222	GRMZM2G145370
GRMZM2G118610	Zm00001d007259	GRMZM2G011575
GRMZM2G022787	Zm00001d007261	GRMZM2G011575
GRMZM2G432075	Zm00001d012557	GRMZM2G476009
GRMZM2G053236	Zm00001d043258	GRMZM2G062283
GRMZM2G056303	Zm00001d006763	GRMZM2G146416
GRMZM2G144995	Zm00001d015090	GRMZM2G029065
GRMZM2G408598	Zm00001d053859	GRMZM2G052720
GRMZM2G419694	Zm00001d025984	GRMZM2G427097
GRMZM2G016817	Zm00001d025470	GRMZM2G158097
GRMZM2G109527	Zm00001d039653	GRMZM5G830695
GRMZM2G091168	Zm00001d033502	GRMZM2G093855
GRMZM2G114692	Zm00001d010217	GRMZM2G071362
GRMZM2G124434	Zm00001d022327	GRMZM2G301934
GRMZM2G162868	Zm00001d025514	GRMZM2G392168
GRMZM2G038301	Zm00001d028679	GRMZM2G338333
GRMZM2G358540	Zm00001d036484	GRMZM2G416386
GRMZM2G151254	Zm00001d017492	GRMZM2G119490
GRMZM2G128466	Zm00001d051666	GRMZM2G136139
GRMZM2G122656	Zm00001d008188	GRMZM2G077233
GRMZM2G046458	Zm00001d008189	GRMZM2G077233
GRMZM2G041068	Zm00001d007599	GRMZM2G105510
GRMZM2G417496	Zm00001d011803	GRMZM2G149535
GRMZM2G078297	Zm00001d034783	GRMZM2G470422
GRMZM2G139041	Zm00001d044498	AC200210.1_FG006
GRMZM2G067675	Zm00001d006360	GRMZM2G114322
GRMZM2G090034	Zm00001d033664	GRMZM2G153706
GRMZM2G400005	Zm00001d022006	GRMZM2G181219
GRMZM2G128918	Zm00001d025353	GRMZM2G095810
GRMZM2G025611	Zm00001d022132	GRMZM2G111224
GRMZM2G104347	Zm00001d040499	GRMZM2G334891
GRMZM2G174990	Zm00001d007977	GRMZM2G479717
GRMZM5G870219	Zm00001d038518	GRMZM2G037286
GRMZM2G430027	Zm00001d002338	GRMZM2G044629
GRMZM2G084859	Zm00001d003530	GRMZM2G408038
GRMZM2G166684	Zm00001d033680	GRMZM2G144744
GRMZM2G019050	Zm00001d038754	GRMZM2G101413
GRMZM2G021742	Zm00001d050008	GRMZM2G171367
GRMZM2G089819	Zm00001d045507	AC234164.1_FG004
GRMZM2G429714	Zm00001d005052	GRMZM2G051534
GRMZM2G129431	Zm00001d048041	GRMZM2G026742
GRMZM2G006943	Zm00001d017432	GRMZM2G156575
GRMZM2G135165	Zm00001d017138	GRMZM2G137426
GRMZM2G004641	Zm00001d032956	GRMZM2G071268
GRMZM2G327059	Zm00001d012954	GRMZM2G144008
GRMZM2G109480	Zm00001d031784	GRMZM2G117189
GRMZM2G159759	Zm00001d003624	GRMZM2G361100
GRMZM2G534116	Zm00001d037288	GRMZM2G156310
GRMZM2G327032	Zm00001d030323	GRMZM2G337766
GRMZM2G342895	Zm00001d047149	GRMZM2G428579
GRMZM2G442170	Zm00001d020519	GRMZM2G093731
GRMZM2G084717	Zm00001d034427	GRMZM2G070322
GRMZM2G169167	Zm00001d007858	GRMZM2G016236
GRMZM2G125648	Zm00001d049958	GRMZM2G049525
GRMZM2G181453	Zm00001d018006	GRMZM2G116185
GRMZM2G032711	Zm00001d017537	GRMZM2G055435
GRMZM2G015983	Zm00001d029811	GRMZM2G127168
GRMZM2G152921	Zm00001d022112	GRMZM2G393671
GRMZM2G023715	Zm00001d002296	GRMZM2G094255
GRMZM2G104078	Zm00001d012928	GRMZM2G121663
GRMZM2G133048	Zm00001d041766	GRMZM2G308219
GRMZM2G013555	Zm00001d029898	GRMZM5G846082
GRMZM2G119703	Zm00001d014778	GRMZM2G158131
GRMZM2G052341	Zm00001d013860	GRMZM2G002859
GRMZM2G078198	Zm00001d002847	GRMZM2G354909
GRMZM2G032547	Zm00001d009021	GRMZM2G114572
GRMZM2G082376	Zm00001d004506	GRMZM2G168382
GRMZM2G061728	Zm00001d007378	GRMZM2G056335
GRMZM2G318849	Zm00001d018616	GRMZM2G179429
GRMZM2G094850	Zm00001d003157	GRMZM2G154397
GRMZM2G141551	Zm00001d042268	GRMZM2G032132
GRMZM2G129135	Zm00001d005578	AC203957.3_FG004
GRMZM2G129246	Zm00001d026012	GRMZM2G018027
GRMZM2G049422	Zm00001d017539	GRMZM2G005996
GRMZM2G046317	Zm00001d001881	GRMZM2G077541
GRMZM2G025882	Zm00001d023964	GRMZM2G073908
GRMZM2G146143	Zm00001d044035	GRMZM2G004382
GRMZM2G180211	Zm00001d047634	GRMZM2G121456
GRMZM2G181637	Zm00001d031178	GRMZM2G131245
GRMZM2G139093	Zm00001d016784	GRMZM2G119133
AC194609.2_FG003	Zm00001d037650	GRMZM2G002656
GRMZM5G874270	Zm00001d003744	GRMZM5G820287
GRMZM2G158328	Zm00001d008825	GRMZM2G107479
GRMZM2G118014	Zm00001d002625	GRMZM2G128179
GRMZM2G318213	Zm00001d019125	GRMZM2G125516
GRMZM2G012140	Zm00001d031720	GRMZM2G077320
GRMZM2G115998	Zm00001d047126	GRMZM2G118022
GRMZM2G124701	Zm00001d052835	GRMZM2G039431
GRMZM5G880306	Zm00001d021269	GRMZM2G338916
GRMZM2G172945	Zm00001d053881	GRMZM2G155384
GRMZM2G058374	Zm00001d006688	GRMZM2G062156
GRMZM2G319057	Zm00001d037509	GRMZM2G063754
GRMZM2G062657	Zm00001d015700	GRMZM2G170577
zma-MIR167e	Zm00001d004814	GRMZM2G043226
GRMZM2G162175	Zm00001d028423	GRMZM2G179907
GRMZM2G052011	Zm00001d041055	GRMZM2G384695
GRMZM5G863146	Zm00001d010578	GRMZM2G068192
GRMZM2G092232	Zm00001d020064	GRMZM2G149295
GRMZM2G054225	Zm00001d005015	GRMZM5G890976
GRMZM2G032209	Zm00001d020157	GRMZM2G154621
GRMZM2G161306	Zm00001d042508	GRMZM2G118362
GRMZM2G035268	Zm00001d022344	GRMZM2G131389
GRMZM2G011169	Zm00001d016134	GRMZM2G162748
GRMZM2G029785	Zm00001d035752	GRMZM2G025214
GRMZM2G153999	Zm00001d035751	GRMZM2G025214
AC197340.3_FG003	Zm00001d026160	GRMZM2G429000
GRMZM2G066755	Zm00001d014159	GRMZM2G012030
GRMZM2G071349	Zm00001d022032	GRMZM2G119705
GRMZM2G009627	Zm00001d015703	GRMZM2G014577
GRMZM2G433767	Zm00001d015704	GRMZM2G014577
GRMZM5G833563	Zm00001d006348	GRMZM2G004619
GRMZM2G000603	Zm00001d035323	GRMZM2G143765
GRMZM2G059106	Zm00001d051637	GRMZM2G061303
GRMZM2G178924	Zm00001d021069	GRMZM2G054277
GRMZM2G019738	Zm00001d031489	GRMZM2G168893
GRMZM2G166692	Zm00001d031942	GRMZM2G167836
GRMZM2G043331	Zm00001d042437	GRMZM2G077809
GRMZM2G150864	Zm00001d019180	GRMZM2G043275
GRMZM2G016997	Zm00001d046668	AC233863.1_FG002
GRMZM2G153769	Zm00001d052921	GRMZM2G104375
GRMZM5G861357	Zm00001d051936	GRMZM2G099376
GRMZM2G404965	Zm00001d018822	GRMZM2G029587
GRMZM2G037130	Zm00001d022081	GRMZM2G167520
GRMZM2G161450	Zm00001d008869	AC187157.4_FG005
GRMZM2G125148	Zm00001d004568	GRMZM2G008649
GRMZM2G312954	Zm00001d045160	GRMZM2G007683
GRMZM2G105362	Zm00001d047859	GRMZM2G307906
GRMZM2G027995	Zm00001d047858	GRMZM2G307906
GRMZM2G136495	Zm00001d028422	GRMZM2G019689
GRMZM2G144645	Zm00001d036768	GRMZM2G078820
GRMZM2G032107	Zm00001d042315	GRMZM2G171650
GRMZM2G083788	Zm00001d052133	GRMZM2G126646
AC191771.3_FG008	Zm00001d003306	GRMZM2G447785
GRMZM2G168166	Zm00001d037941	GRMZM2G085964
GRMZM2G109821	Zm00001d052125	GRMZM2G165991
GRMZM2G080355	Zm00001d046149	GRMZM5G812126
GRMZM2G171248	Zm00001d021318	GRMZM2G103458
GRMZM2G098714	Zm00001d037590	GRMZM2G159369
GRMZM2G109032	Zm00001d003084	GRMZM2G177853
GRMZM2G002687	Zm00001d038062	GRMZM2G176465
GRMZM2G045664	Zm00001d028967	GRMZM2G145008
GRMZM2G074395	Zm00001d026469	GRMZM2G004924
GRMZM2G032351	Zm00001d025892	GRMZM2G164649
GRMZM2G008507	Zm00001d052660	GRMZM2G117614
GRMZM2G131998	Zm00001d043414	GRMZM2G324705
GRMZM2G117558	Zm00001d030123	GRMZM2G025157
GRMZM2G036980	Zm00001d018828	GRMZM2G106222
GRMZM2G040078	Zm00001d002065	GRMZM2G166281
GRMZM2G089119	Zm00001d018033	GRMZM2G105791
GRMZM2G069229	Zm00001d042013	GRMZM2G309512
GRMZM2G436986	Zm00001d037004	GRMZM2G101938
GRMZM2G063643	Zm00001d038924	GRMZM2G037998
GRMZM2G097977	Zm00001d032233	GRMZM2G056815
GRMZM2G146490	Zm00001d028838	GRMZM5G819965
GRMZM5G825226	Zm00001d018141	GRMZM2G359874
GRMZM2G083749	Zm00001d042063	GRMZM2G057506
GRMZM2G041549	Zm00001d046981	GRMZM2G454449
GRMZM2G477238	Zm00001d019228	GRMZM2G093276
GRMZM5G802858	Zm00001d021195	GRMZM2G149619
GRMZM2G096920	Zm00001d009631	AC234185.1_FG004
GRMZM2G064753	Zm00001d034624	AC206259.3_FG003
GRMZM2G180246	Zm00001d053396	GRMZM2G048733
GRMZM2G073671	Zm00001d045028	GRMZM2G013318
GRMZM2G432050	Zm00001d019706	GRMZM2G074531
GRMZM2G169648	Zm00001d049930	GRMZM2G041885
GRMZM2G105330	Zm00001d025327	GRMZM2G158300
GRMZM5G862331	Zm00001d026015	GRMZM2G149178
GRMZM2G050309	Zm00001d005454	GRMZM2G047713
GRMZM2G107556	Zm00001d009964	GRMZM2G093186
GRMZM2G117439	Zm00001d043953	GRMZM2G122362
GRMZM2G411786	Zm00001d046919	GRMZM2G057616
GRMZM2G076657	Zm00001d020794	GRMZM2G053779
GRMZM2G000825	Zm00001d024756	GRMZM2G061728
GRMZM2G073228	Zm00001d017708	GRMZM2G067183
GRMZM2G091069	Zm00001d033578	GRMZM2G113569
GRMZM2G001160	Zm00001d009034	GRMZM2G051659
GRMZM2G446960	Zm00001d014140	GRMZM2G068149
GRMZM2G084576	Zm00001d041523	GRMZM2G332703
GRMZM2G337330	Zm00001d042144	GRMZM2G366622
GRMZM2G051059	Zm00001d011607	GRMZM2G375696
GRMZM2G040296	Zm00001d003378	GRMZM2G042443
GRMZM2G024865	Zm00001d034196	GRMZM2G038301
GRMZM5G886044	Zm00001d025916	GRMZM2G040803
GRMZM2G102639	Zm00001d052473	GRMZM2G055538
GRMZM2G504906	Zm00001d016087	GRMZM2G300119
GRMZM2G149894	Zm00001d010971	GRMZM2G351937
GRMZM2G034155	Zm00001d006142	GRMZM2G022032
GRMZM2G162316	Zm00001d047860	GRMZM2G007406
GRMZM2G064466	Zm00001d007158	GRMZM2G001297
GRMZM2G171565	Zm00001d050375	GRMZM2G091155
GRMZM2G334142	Zm00001d014726	GRMZM2G135904
GRMZM2G068701	Zm00001d022127	GRMZM2G127035
GRMZM2G091511	Zm00001d049692	GRMZM2G105387
GRMZM2G056961	Zm00001d035113	GRMZM2G019257
GRMZM2G057486	Zm00001d017718	GRMZM2G114113
GRMZM2G065557	Zm00001d047463	GRMZM2G170812
GRMZM2G176665	Zm00001d017357	GRMZM2G178497
GRMZM2G157267	Zm00001d026121	GRMZM2G455128
GRMZM2G054120	Zm00001d026111	GRMZM2G702579
GRMZM2G081955	Zm00001d031808	GRMZM2G141607
GRMZM2G024730	Zm00001d040218	GRMZM2G132936
GRMZM2G050126	Zm00001d041525	GRMZM2G010628
GRMZM2G317584	Zm00001d040383	GRMZM2G057305
GRMZM2G077406	Zm00001d044808	AC212353.4_FG004
GRMZM2G077415	Zm00001d007441	GRMZM2G064366
GRMZM2G086132	Zm00001d002163	GRMZM2G106578
GRMZM2G011588	Zm00001d034671	GRMZM2G093210
GRMZM2G081172	Zm00001d033786	GRMZM2G155767
GRMZM2G425249	Zm00001d003950	GRMZM2G179106
GRMZM2G361501	Zm00001d003144	GRMZM2G164036
GRMZM5G844703	Zm00001d038318	GRMZM2G070113
GRMZM2G177596	Zm00001d028177	GRMZM2G376074
GRMZM2G034876	Zm00001d015203	GRMZM2G399858
GRMZM2G177895	Zm00001d008221	GRMZM2G005619
GRMZM2G156145	Zm00001d024962	GRMZM5G897005
GRMZM2G337128	Zm00001d037623	GRMZM2G426469
GRMZM2G329047	Zm00001d018752	GRMZM2G141517
GRMZM2G319798	Zm00001d015579	GRMZM2G012865
GRMZM2G176655	Zm00001d008640	GRMZM2G165692
GRMZM2G134806	Zm00001d013067	GRMZM2G003002
AC208341.4_FG005	Zm00001d008791	GRMZM2G167554
GRMZM2G353301	Zm00001d053899	GRMZM5G846811
GRMZM2G131324	Zm00001d017066	GRMZM2G056988
GRMZM2G339866	Zm00001d017065	GRMZM2G056988
GRMZM5G892879	Zm00001d028093	GRMZM2G006977
GRMZM2G010987	Zm00001d044683	GRMZM2G175076
GRMZM2G005256	Zm00001d019354	GRMZM2G382273
GRMZM2G397055	Zm00001d004167	GRMZM2G013357
AC149828.2_FG002	Zm00001d045372	GRMZM2G050971
GRMZM2G065205	Zm00001d029632	GRMZM2G048821
GRMZM2G074085	Zm00001d019650	GRMZM2G088870
AC212859.3_FG008	Zm00001d013118	GRMZM2G089448
GRMZM2G168249	Zm00001d047591	GRMZM2G129815
GRMZM2G381822	Zm00001d038121	GRMZM2G090905
GRMZM2G081102	Zm00001d006181	GRMZM2G124809
GRMZM5G801307	Zm00001d041183	GRMZM2G147811
GRMZM2G101000	Zm00001d047764	GRMZM2G011071
GRMZM2G014750	Zm00001d032710	GRMZM2G004996
GRMZM2G177812	Zm00001d021515	GRMZM2G032253
GRMZM2G060540	Zm00001d033933	GRMZM2G133749
GRMZM2G097989	Zm00001d005306	GRMZM2G055883
GRMZM2G128322	Zm00001d018749	GRMZM2G148831
GRMZM2G133396	Zm00001d041582	GRMZM2G063544
GRMZM2G107540	Zm00001d040322	GRMZM5G819807
GRMZM2G334041	Zm00001d008489	GRMZM2G064750
GRMZM2G055141	Zm00001d009013	GRMZM2G076636
AC195860.3_FG005	Zm00001d031810	GRMZM2G117347
GRMZM2G000245	Zm00001d048085	AC197717.3_FG002
GRMZM2G130625	Zm00001d049049	GRMZM2G124593
GRMZM2G115921	Zm00001d030697	GRMZM2G119252
AC149829.2_FG003	Zm00001d018130	GRMZM2G371795
GRMZM2G172834	Zm00001d002939	GRMZM2G123122
GRMZM2G057690	Zm00001d013465	GRMZM2G024973
GRMZM2G360873	Zm00001d053748	GRMZM2G133653
GRMZM2G140970	Zm00001d052307	GRMZM2G091583
GRMZM2G051541	Zm00001d002282	GRMZM2G041518
GRMZM2G134985	Zm00001d011174	GRMZM2G081626
GRMZM2G306348	Zm00001d002350	GRMZM2G093526
GRMZM2G052920	Zm00001d021652	GRMZM2G009412
GRMZM2G131793	Zm00001d041475	GRMZM2G114584
GRMZM2G333833	Zm00001d039675	GRMZM2G066362
GRMZM2G431251	Zm00001d044580	GRMZM2G409312
GRMZM2G090419	Zm00001d048520	GRMZM2G037327
GRMZM2G138125	Zm00001d036911	GRMZM2G423378
GRMZM2G088487	Zm00001d017952	GRMZM2G090505
GRMZM2G133844	Zm00001d051441	GRMZM2G081829
GRMZM2G097593	Zm00001d041662	AC206425.3_FG002
GRMZM2G052740	Zm00001d002540	GRMZM2G314396
AC234165.1_FG002	Zm00001d049742	GRMZM2G113252
GRMZM2G087712	Zm00001d049079	GRMZM6G616789
AC217300.3_FG005	Zm00001d023523	GRMZM2G001272
GRMZM2G000842	Zm00001d038903	GRMZM2G179793
GRMZM2G163641	Zm00001d044131	GRMZM2G130354
GRMZM2G131611	Zm00001d011658	GRMZM2G032484
GRMZM2G169642	Zm00001d033986	GRMZM2G009895
GRMZM2G370155	Zm00001d051912	GRMZM2G142661
GRMZM2G043346	Zm00001d016653	GRMZM2G099334
GRMZM2G120091	Zm00001d033621	GRMZM2G123128
GRMZM2G081268	Zm00001d045783	GRMZM2G010637
GRMZM5G860590	Zm00001d049960	GRMZM2G337128
GRMZM2G463953	Zm00001d040741	GRMZM2G123815
GRMZM2G091119	Zm00001d031418	GRMZM2G083755
AC204515.4_FG006	Zm00001d003179	GRMZM2G053557
GRMZM2G106752	Zm00001d028482	GRMZM2G030223
GRMZM2G117763	Zm00001d050947	GRMZM2G165231
GRMZM2G151934	Zm00001d009918	GRMZM2G068294
AC226368.2_FG006	Zm00001d023738	GRMZM2G136563
AC205122.4_FG003	Zm00001d038553	GRMZM2G440902
GRMZM2G162413	Zm00001d028704	GRMZM2G052479
GRMZM2G165931	Zm00001d047259	GRMZM2G125813
GRMZM2G109425	Zm00001d007053	GRMZM2G008095
GRMZM2G078314	Zm00001d006511	GRMZM2G125850
GRMZM2G131280	Zm00001d034724	GRMZM2G142097
GRMZM2G114895	Zm00001d024547	GRMZM2G175265
GRMZM2G089976	Zm00001d021285	GRMZM2G135783
GRMZM2G065804	Zm00001d042033	GRMZM2G016382
GRMZM2G078933	Zm00001d017540	GRMZM2G005909
GRMZM2G013728	Zm00001d028227	GRMZM2G163129
GRMZM2G169773	Zm00001d024093	AC214266.3_FG002
GRMZM2G321778	Zm00001d047579	GRMZM2G134279
GRMZM2G080314	Zm00001d038657	GRMZM2G368410
GRMZM2G129444	Zm00001d042603	GRMZM2G011731
GRMZM2G109677	Zm00001d022246	GRMZM2G099253
GRMZM2G395429	Zm00001d007884	GRMZM5G851654
GRMZM2G075958	Zm00001d021336	GRMZM2G160922
GRMZM2G171420	Zm00001d017125	GRMZM2G308203
GRMZM2G476009	Zm00001d034916	GRMZM2G363229
GRMZM2G107737	Zm00001d045036	GRMZM2G070475
GRMZM2G137965	Zm00001d008621	GRMZM2G353895
GRMZM5G832138	Zm00001d026483	GRMZM2G104294
GRMZM2G011136	Zm00001d044100	GRMZM2G122028
GRMZM2G078754	Zm00001d053762	GRMZM2G124254
GRMZM2G030646	Zm00001d010672	GRMZM2G083016
AC230011.2_FG002	Zm00001d010673	GRMZM2G083016
GRMZM2G134957	Zm00001d031471	GRMZM2G056122
GRMZM2G060924	Zm00001d035551	GRMZM2G099186
GRMZM2G048281	Zm00001d007228	GRMZM2G129209
GRMZM2G009335	Zm00001d012443	AC233788.2_FG002
GRMZM2G056068	Zm00001d004664	GRMZM2G164074
GRMZM2G167387	Zm00001d048943	GRMZM2G419836
GRMZM2G346207	Zm00001d013210	GRMZM2G035248
GRMZM2G374812	Zm00001d039439	GRMZM5G852801
GRMZM2G098346	Zm00001d036760	GRMZM2G131020
GRMZM2G072388	Zm00001d047103	GRMZM2G026952
GRMZM2G075150	Zm00001d013060	GRMZM2G701297
GRMZM2G167824	Zm00001d028088	GRMZM5G880508
GRMZM2G451254	Zm00001d024036	GRMZM2G095323
GRMZM2G078468	Zm00001d033314	GRMZM2G088427
AC196961.2_FG003	Zm00001d043778	GRMZM2G050697
GRMZM2G008123	Zm00001d010782	GRMZM2G162884
GRMZM2G425986	Zm00001d012571	GRMZM2G091006
GRMZM2G022253	Zm00001d017214	GRMZM2G392794
AC207205.3_FG004	Zm00001d020134	GRMZM2G479906
GRMZM2G005715	Zm00001d007199	GRMZM2G101409
GRMZM2G164974	Zm00001d051532	GRMZM2G156472
GRMZM2G134295	Zm00001d043401	GRMZM2G452529
GRMZM2G056075	Zm00001d044048	GRMZM2G104226
GRMZM2G074987	Zm00001d030014	GRMZM2G049422
GRMZM2G051502	Zm00001d030129	GRMZM2G457147
GRMZM2G168886	Zm00001d007295	GRMZM2G048680
GRMZM2G104626	Zm00001d021632	GRMZM2G075794
GRMZM2G162445	Zm00001d048419	AC233901.1_FG004
GRMZM2G148099	Zm00001d043584	GRMZM2G311328
GRMZM2G086801	Zm00001d043585	GRMZM2G311328
GRMZM2G046244	Zm00001d036238	GRMZM5G873767
GRMZM2G461145	Zm00001d013506	GRMZM2G412229
GRMZM2G123996	Zm00001d006910	GRMZM5G879278
GRMZM2G590033	Zm00001d040467	GRMZM2G162369
GRMZM2G166658	Zm00001d035185	GRMZM2G136680
GRMZM2G064640	Zm00001d005482	GRMZM2G145895
GRMZM2G124371	Zm00001d024841	GRMZM2G138252
AC205703.4_FG005	Zm00001d043299	AC190623.3_FG001
GRMZM2G023257	Zm00001d019643	GRMZM5G803610
GRMZM5G873015	Zm00001d028986	GRMZM2G314064
GRMZM2G143588	Zm00001d031745	GRMZM2G142962
GRMZM2G103955	Zm00001d026647	GRMZM2G074787
GRMZM2G171170	Zm00001d046601	GRMZM2G093065
GRMZM2G030284	Zm00001d014817	GRMZM2G048073
GRMZM2G455075	Zm00001d012102	GRMZM2G065971
GRMZM2G138632	Zm00001d024314	GRMZM2G118610
GRMZM2G111697	Zm00001d005520	GRMZM2G067514
GRMZM2G132971	Zm00001d027374	GRMZM2G008710
GRMZM2G154437	Zm00001d019250	GRMZM2G156127
GRMZM2G113950	Zm00001d033050	GRMZM2G145412
GRMZM2G009214	Zm00001d037215	GRMZM2G067373
GRMZM2G146878	Zm00001d038302	GRMZM2G131756
GRMZM2G174196	Zm00001d028754	GRMZM2G459824
GRMZM2G090904	Zm00001d022276	GRMZM2G300709
GRMZM5G821639	Zm00001d006096	AC211164.5_FG003
GRMZM2G079468	Zm00001d013612	GRMZM2G066191
GRMZM2G110626	Zm00001d005278	GRMZM2G103452
GRMZM2G112003	Zm00001d045808	GRMZM2G076303
GRMZM2G093391	Zm00001d021915	GRMZM2G060762
GRMZM2G174427	Zm00001d052845	GRMZM2G067555
GRMZM2G164787	Zm00001d050921	GRMZM2G024647
GRMZM2G430780	Zm00001d030990	GRMZM2G100121
GRMZM2G127340	Zm00001d043205	GRMZM2G310368
GRMZM2G314520	Zm00001d020950	GRMZM5G871418
GRMZM2G475257	Zm00001d021699	GRMZM2G379780
GRMZM2G145075	Zm00001d006329	GRMZM2G153369
GRMZM2G089574	Zm00001d038002	GRMZM2G093325
GRMZM2G017089	Zm00001d038003	GRMZM2G093325
GRMZM2G108586	Zm00001d008216	GRMZM2G042636
GRMZM2G002830	Zm00001d012653	GRMZM2G079389
GRMZM2G439950	Zm00001d040048	GRMZM2G018806
GRMZM2G083475	Zm00001d024935	GRMZM2G174736
GRMZM2G034471	Zm00001d046314	GRMZM5G843446
GRMZM2G058276	Zm00001d036972	GRMZM2G449817
GRMZM2G386714	Zm00001d038521	GRMZM2G129064
GRMZM2G057642	Zm00001d028452	GRMZM2G063733
GRMZM2G570528	Zm00001d013887	GRMZM2G060349
GRMZM5G856366	Zm00001d041853	GRMZM2G041415
GRMZM2G348512	Zm00001d018467	GRMZM2G078324
GRMZM2G361593	Zm00001d029963	GRMZM2G088524
GRMZM2G065420	Zm00001d014088	GRMZM2G412304
GRMZM2G416677	Zm00001d044815	GRMZM2G110726
GRMZM2G115499	Zm00001d052244	GRMZM2G040548
AC209242.3_FG003	Zm00001d036951	GRMZM2G335618
GRMZM2G082434	Zm00001d024803	GRMZM2G041454
GRMZM2G180519	Zm00001d014358	GRMZM2G056766
GRMZM2G094165	Zm00001d038911	GRMZM2G004909
GRMZM6G608324	Zm00001d026562	GRMZM2G179507
GRMZM2G041310	Zm00001d034782	GRMZM2G338809
GRMZM2G036019	Zm00001d014122	GRMZM2G134862
GRMZM2G055435	Zm00001d028252	GRMZM2G342685
GRMZM2G110402	Zm00001d038373	AC213621.5_FG004
GRMZM2G127147	Zm00001d013960	GRMZM2G177314
GRMZM2G324956	Zm00001d029396	GRMZM2G090018
GRMZM2G069518	Zm00001d003430	GRMZM2G012404
GRMZM2G369956	Zm00001d006384	GRMZM2G133421
GRMZM2G095534	Zm00001d011908	GRMZM2G037585
GRMZM2G147867	Zm00001d020580	GRMZM2G071959
GRMZM2G076329	Zm00001d005803	GRMZM2G309747
GRMZM2G071602	Zm00001d001959	GRMZM2G062420
GRMZM2G119370	Zm00001d043445	GRMZM2G021704
AC197146.3_FG001	Zm00001d019122	GRMZM2G078595
GRMZM2G106493	Zm00001d034488	GRMZM2G453320
GRMZM2G137338	Zm00001d049643	GRMZM2G049185
GRMZM2G058026	Zm00001d036136	GRMZM2G152041
GRMZM2G053726	Zm00001d029198	GRMZM2G102548
GRMZM2G132506	Zm00001d029199	GRMZM2G102548
GRMZM5G832149	Zm00001d034796	GRMZM5G891724
GRMZM2G018697	Zm00001d027540	GRMZM2G096269
GRMZM2G057374	Zm00001d025463	GRMZM2G341216
GRMZM2G150631	Zm00001d046047	GRMZM2G025480
GRMZM2G096815	Zm00001d018472	GRMZM5G871520
GRMZM2G061613	Zm00001d052903	GRMZM2G393337
GRMZM2G100473	Zm00001d040500	GRMZM2G160136
GRMZM2G036554	Zm00001d027338	GRMZM2G393062
GRMZM2G147667	Zm00001d050300	GRMZM2G056350
GRMZM2G159953	Zm00001d042214	GRMZM2G425004
GRMZM2G128938	Zm00001d035562	GRMZM2G163406
GRMZM2G703749	Zm00001d025247	GRMZM2G034206
GRMZM2G104353	Zm00001d044386	GRMZM2G368767
GRMZM2G096682	Zm00001d008983	GRMZM2G058491
GRMZM2G315401	Zm00001d053822	GRMZM2G132854
GRMZM2G453320	Zm00001d013582	GRMZM2G016184
GRMZM2G105307	Zm00001d053962	GRMZM2G019838
GRMZM5G809587	Zm00001d040710	GRMZM2G314667
GRMZM2G336583	Zm00001d033955	GRMZM2G001869
GRMZM2G097738	Zm00001d023859	GRMZM2G300965
GRMZM2G107987	Zm00001d020932	GRMZM2G085467
GRMZM2G133836	Zm00001d006697	GRMZM2G024708
GRMZM5G806358	Zm00001d051055	GRMZM2G067417
GRMZM2G022032	Zm00001d022142	GRMZM2G114461
GRMZM2G106600	Zm00001d039881	GRMZM2G037134
GRMZM2G042502	Zm00001d004881	GRMZM2G032478
GRMZM2G326328	Zm00001d018261	GRMZM2G463904
GRMZM2G305046	Zm00001d032548	GRMZM2G131618
GRMZM2G095333	Zm00001d043555	GRMZM2G158562
GRMZM2G433557	Zm00001d026050	GRMZM2G173429
GRMZM2G083076	Zm00001d042661	GRMZM2G452630
GRMZM2G017045	Zm00001d006453	GRMZM2G498656
GRMZM2G102815	Zm00001d017101	GRMZM2G121115
GRMZM2G131442	Zm00001d011197	GRMZM5G852338
GRMZM2G069177	Zm00001d033172	GRMZM2G074024
GRMZM2G129457	Zm00001d052653	GRMZM2G441541
GRMZM2G029219	Zm00001d018983	GRMZM2G021416
GRMZM2G134687	Zm00001d007764	GRMZM2G149935
GRMZM2G119079	Zm00001d013532	GRMZM2G170338
GRMZM2G005973	Zm00001d013590	GRMZM2G006474
AC209877.3_FG002	Zm00001d025458	GRMZM2G087180
GRMZM2G009144	Zm00001d025445	GRMZM2G009888
GRMZM2G474777	Zm00001d043975	GRMZM5G802854
GRMZM2G018281	Zm00001d046454	GRMZM2G406603
GRMZM2G158976	Zm00001d033985	GRMZM2G010034
GRMZM2G161809	Zm00001d013487	GRMZM2G102616
GRMZM2G018280	Zm00001d018798	GRMZM2G013114
GRMZM2G092813	Zm00001d053177	GRMZM2G126190
GRMZM2G178968	Zm00001d009163	GRMZM2G335657
AC234171.1_FG003	Zm00001d019266	GRMZM2G144002
GRMZM5G876811	Zm00001d041953	GRMZM2G459642
GRMZM5G889760	Zm00001d017883	GRMZM2G029186
GRMZM5G817948	Zm00001d013415	GRMZM2G158359
GRMZM2G083344	Zm00001d003308	GRMZM2G148211
GRMZM2G095141	Zm00001d034423	GRMZM2G073511
GRMZM2G175236	Zm00001d033397	GRMZM2G050684
GRMZM2G083138	Zm00001d022427	GRMZM2G311665
GRMZM5G851051	Zm00001d021754	GRMZM2G032071
GRMZM2G173878	Zm00001d008788	GRMZM2G070487
GRMZM2G305060	Zm00001d046900	GRMZM2G172357
GRMZM2G133952	Zm00001d020811	GRMZM2G096952
AC209858.4_FG002	Zm00001d018382	GRMZM2G179658
GRMZM2G160523	Zm00001d034412	GRMZM2G017299
GRMZM2G024882	Zm00001d022153	GRMZM2G060194
GRMZM2G360688	Zm00001d004396	GRMZM2G137984
GRMZM2G042593	Zm00001d028243	GRMZM2G111324
GRMZM2G152688	Zm00001d012238	GRMZM2G005236
GRMZM2G114613	Zm00001d034159	GRMZM5G817934
GRMZM2G097089	Zm00001d028018	GRMZM2G003520
GRMZM2G150408	Zm00001d005846	GRMZM2G005486
GRMZM2G333433	Zm00001d031223	GRMZM2G423476
GRMZM5G852378	Zm00001d047115	GRMZM2G027167
GRMZM2G031523	Zm00001d009520	GRMZM2G043764
GRMZM2G447455	Zm00001d039718	GRMZM5G804783
GRMZM2G109159	Zm00001d029353	GRMZM2G023325
GRMZM2G119755	Zm00001d018466	GRMZM2G078396
GRMZM2G142249	Zm00001d042697	GRMZM2G077333
GRMZM2G444073	Zm00001d052489	AC217271.3_FG002
GRMZM2G049790	Zm00001d024873	GRMZM2G424651
GRMZM2G034243	Zm00001d034876	GRMZM2G422649
GRMZM2G068984	Zm00001d034878	GRMZM2G099987
GRMZM2G017081	Zm00001d030167	GRMZM2G020620
GRMZM2G470365	Zm00001d047519	GRMZM2G151295
GRMZM2G440968	Zm00001d007972	GRMZM2G103955
GRMZM2G102483	Zm00001d008422	GRMZM2G080937
GRMZM2G077212	Zm00001d012831	GRMZM2G083346
GRMZM2G063737	Zm00001d039354	GRMZM2G435589
GRMZM2G063517	Zm00001d015126	GRMZM2G371167
GRMZM2G139467	Zm00001d047970	GRMZM2G039919
GRMZM2G301803	Zm00001d015433	GRMZM2G086032
GRMZM2G346982	Zm00001d012273	GRMZM2G438293
GRMZM2G062499	Zm00001d013182	GRMZM2G033267
GRMZM2G097854	Zm00001d052947	GRMZM2G017411
GRMZM2G052148	Zm00001d012849	GRMZM2G013042
GRMZM2G084968	Zm00001d036533	GRMZM2G175782
GRMZM2G092723	Zm00001d047750	GRMZM2G118959
GRMZM2G347623	Zm00001d003223	GRMZM2G139022
GRMZM2G180815	Zm00001d047674	GRMZM2G003738
GRMZM2G113626	Zm00001d016756	GRMZM2G037865
GRMZM2G119623	Zm00001d032968	GRMZM2G035594
GRMZM2G097469	Zm00001d010507	GRMZM2G413687
GRMZM2G173718	Zm00001d053576	GRMZM2G134582
GRMZM2G108819	Zm00001d012517	AC218972.3_FG007
GRMZM2G104025	Zm00001d003545	GRMZM2G021459
GRMZM2G095552	Zm00001d015338	GRMZM2G158520
GRMZM2G166987	Zm00001d037497	GRMZM2G127115
GRMZM2G061932	Zm00001d029875	GRMZM5G813892
GRMZM2G400268	Zm00001d034205	GRMZM2G028286
GRMZM2G142661	Zm00001d047334	GRMZM2G113860
GRMZM2G012964	Zm00001d005442	GRMZM2G050885
GRMZM2G153615	Zm00001d021032	GRMZM2G105999
GRMZM2G120320	Zm00001d036782	GRMZM2G127154
GRMZM2G081192	Zm00001d053038	GRMZM5G828139
GRMZM2G044797	Zm00001d007871	GRMZM2G021921
GRMZM2G008058	Zm00001d053011	GRMZM2G128426
GRMZM2G362281	Zm00001d048472	GRMZM2G064005
GRMZM2G093809	Zm00001d026245	GRMZM2G415229
GRMZM2G133926	Zm00001d029950	GRMZM2G092590
GRMZM2G056849	Zm00001d031429	GRMZM2G132623
GRMZM2G029824	Zm00001d043525	GRMZM2G051151
GRMZM2G366698	Zm00001d028696	GRMZM2G338037
GRMZM2G133358	Zm00001d040504	GRMZM2G123407
GRMZM2G070943	Zm00001d031072	GRMZM2G083284
GRMZM5G841309	Zm00001d035322	GRMZM2G443612
GRMZM2G077404	Zm00001d007347	GRMZM2G009097
GRMZM2G044908	Zm00001d047679	GRMZM2G006429
GRMZM2G025731	Zm00001d025920	GRMZM2G468756
GRMZM2G115773	Zm00001d003409	GRMZM2G032905
GRMZM2G036596	Zm00001d047752	GRMZM2G145568
GRMZM2G061287	Zm00001d028685	GRMZM2G396674
GRMZM5G872068	Zm00001d038525	GRMZM2G010357
GRMZM2G060194	Zm00001d001966	GRMZM2G061745
GRMZM5G823484	Zm00001d018524	GRMZM2G014793
GRMZM2G038588	Zm00001d047863	GRMZM2G119627
GRMZM2G066870	Zm00001d021629	GRMZM2G075828
GRMZM2G123790	Zm00001d028894	GRMZM5G824629
GRMZM2G369652	Zm00001d007280	GRMZM2G137546
GRMZM2G047143	Zm00001d021836	GRMZM2G333980
GRMZM2G107591	Zm00001d006828	GRMZM2G043489
GRMZM2G107377	Zm00001d020838	GRMZM2G181390
GRMZM2G107196	Zm00001d050032	GRMZM2G068506
GRMZM2G464985	Zm00001d032543	GRMZM2G131817
GRMZM2G015384	Zm00001d033339	GRMZM2G081915
GRMZM2G103047	Zm00001d002711	GRMZM2G171556
GRMZM2G439195	Zm00001d013256	GRMZM2G071970
GRMZM2G067313	Zm00001d032010	GRMZM2G119761
GRMZM2G071871	Zm00001d038835	GRMZM2G546254
GRMZM2G095020	Zm00001d035140	GRMZM2G009661
GRMZM2G073310	Zm00001d005308	GRMZM2G017334
GRMZM2G316113	Zm00001d008390	GRMZM2G056145
GRMZM2G419239	Zm00001d043109	GRMZM2G054821
GRMZM2G107654	Zm00001d018355	GRMZM2G018573
GRMZM2G025127	Zm00001d033482	GRMZM2G176605
GRMZM2G122172	Zm00001d048487	GRMZM2G116803
GRMZM2G383210	Zm00001d038374	GRMZM5G850966
GRMZM2G086841	Zm00001d017241	GRMZM2G148453
GRMZM2G034843	Zm00001d006108	GRMZM2G099780
GRMZM2G098212	Zm00001d015559	GRMZM2G109805
GRMZM2G053631	Zm00001d037760	GRMZM2G130749
GRMZM2G458824	Zm00001d037263	GRMZM2G082564
GRMZM2G004679	Zm00001d044018	GRMZM2G150952
GRMZM2G363554	Zm00001d044017	GRMZM2G150952
GRMZM2G028302	Zm00001d039584	GRMZM2G151444
GRMZM5G890820	Zm00001d029506	GRMZM2G060544
GRMZM2G019225	Zm00001d017791	GRMZM2G147430
GRMZM2G169820	Zm00001d014972	GRMZM2G055251
GRMZM2G157716	Zm00001d053009	GRMZM2G117064
GRMZM2G030325	Zm00001d015721	GRMZM2G045319
GRMZM2G327247	Zm00001d008306	GRMZM2G022711
GRMZM2G076128	Zm00001d003394	GRMZM2G029001
GRMZM2G083886	Zm00001d032272	GRMZM2G167694
GRMZM2G101769	Zm00001d016406	GRMZM2G341732
GRMZM2G179005	Zm00001d004677	GRMZM5G877316
GRMZM2G173612	Zm00001d006024	GRMZM2G120091
GRMZM2G126261	Zm00001d013984	GRMZM2G048435
GRMZM2G175164	Zm00001d028660	GRMZM2G078052
GRMZM2G073059	Zm00001d023680	GRMZM2G048175
GRMZM2G154316	Zm00001d039050	GRMZM2G117574
GRMZM2G084881	Zm00001d026543	GRMZM2G124466
GRMZM6G946111	Zm00001d034109	GRMZM2G050512
GRMZM2G381059	Zm00001d021278	GRMZM2G143718
GRMZM2G059010	Zm00001d012437	GRMZM2G179985
GRMZM2G173641	Zm00001d035999	GRMZM2G444845
GRMZM2G376067	Zm00001d010790	GRMZM2G173700
GRMZM2G089743	Zm00001d013863	GRMZM2G078379
GRMZM2G025579	Zm00001d033579	GRMZM2G085116
GRMZM2G059836	Zm00001d049269	GRMZM2G406712
GRMZM2G300133	Zm00001d018181	GRMZM2G069298
GRMZM2G378907	Zm00001d005804	GRMZM2G005146
GRMZM2G023051	Zm00001d010294	GRMZM2G007384
GRMZM2G044736	Zm00001d045610	GRMZM2G154093
GRMZM2G175510	Zm00001d043587	GRMZM2G014770
GRMZM2G070487	Zm00001d047563	GRMZM2G317584
GRMZM2G068443	Zm00001d005657	GRMZM2G051752
GRMZM2G176568	Zm00001d021268	GRMZM2G041462
GRMZM2G054481	Zm00001d039177	GRMZM2G167786
GRMZM5G874736	Zm00001d017212	GRMZM2G026943
GRMZM2G104542	Zm00001d029044	GRMZM2G109121
GRMZM2G412885	Zm00001d010914	GRMZM2G002427
GRMZM2G045435	Zm00001d020361	GRMZM2G091265
GRMZM2G321839	Zm00001d043378	GRMZM2G059678
GRMZM2G331253	Zm00001d046696	GRMZM2G033480
GRMZM2G034551	Zm00001d038579	GRMZM2G089136
GRMZM2G098129	Zm00001d003783	GRMZM5G858609
GRMZM2G116640	Zm00001d042813	GRMZM2G083195
GRMZM5G851654	Zm00001d048070	GRMZM2G045981
GRMZM2G013450	Zm00001d033704	GRMZM2G057394
GRMZM2G359018	Zm00001d041298	GRMZM2G456669
GRMZM2G028089	Zm00001d027699	GRMZM2G112640
GRMZM2G057853	Zm00001d028221	GRMZM2G128665
GRMZM2G428379	Zm00001d030601	GRMZM2G039214
GRMZM2G096412	Zm00001d037926	GRMZM2G035526
GRMZM2G178910	Zm00001d023218	GRMZM2G057576
GRMZM2G090230	Zm00001d031958	GRMZM2G015344
GRMZM2G067436	Zm00001d016438	GRMZM2G569948
GRMZM2G148744	Zm00001d052050	GRMZM2G032163
GRMZM2G416142	Zm00001d010341	GRMZM2G098227
GRMZM2G144415	Zm00001d034017	GRMZM2G017186
GRMZM2G025214	Zm00001d038071	GRMZM2G023769
GRMZM2G308944	Zm00001d041229	GRMZM2G163059
GRMZM2G067514	Zm00001d028698	GRMZM2G109967
GRMZM2G396114	Zm00001d004775	GRMZM2G473925
GRMZM2G045109	Zm00001d047559	GRMZM2G162481
GRMZM2G033828	Zm00001d037637	GRMZM2G028110
GRMZM2G012434	Zm00001d002684	GRMZM2G019863
GRMZM2G061969	Zm00001d018599	GRMZM2G152059
GRMZM2G127656	Zm00001d044308	AC217499.3_FG002
GRMZM2G132486	Zm00001d030694	GRMZM2G138419
AC196278.2_FG003	Zm00001d022189	GRMZM2G025281
GRMZM2G069678	Zm00001d049554	GRMZM2G104942
GRMZM2G136139	Zm00001d020392	GRMZM2G319798
GRMZM2G030216	Zm00001d023753	GRMZM2G319262
GRMZM2G027695	Zm00001d050011	GRMZM2G087259
GRMZM2G426415	Zm00001d002161	GRMZM2G106511
GRMZM5G848857	Zm00001d042862	GRMZM2G065557
GRMZM2G115660	Zm00001d030143	GRMZM2G430710
EF517601.1_FG012	Zm00001d040588	GRMZM2G058923
GRMZM2G470438	Zm00001d044088	GRMZM2G473976
GRMZM2G114751	Zm00001d033843	GRMZM2G329864
GRMZM2G027098	Zm00001d022286	GRMZM2G026991
GRMZM2G146862	Zm00001d023213	GRMZM2G135536
GRMZM2G158153	Zm00001d040519	GRMZM2G096100
GRMZM2G137673	Zm00001d023936	GRMZM2G406108
GRMZM2G119941	Zm00001d052242	GRMZM2G025171
GRMZM2G354610	Zm00001d020420	GRMZM2G362131
GRMZM2G131575	Zm00001d031536	GRMZM2G067049
GRMZM2G133838	Zm00001d048667	GRMZM2G448213
GRMZM2G160458	Zm00001d037675	GRMZM2G141776
GRMZM2G479665	Zm00001d027839	GRMZM2G091921
GRMZM2G083262	Zm00001d020887	GRMZM2G018044
GRMZM2G110212	Zm00001d050915	GRMZM2G416142
GRMZM2G028570	Zm00001d003017	GRMZM2G089767
GRMZM2G176225	Zm00001d018501	GRMZM2G064608
GRMZM2G043182	Zm00001d019727	GRMZM2G471779
GRMZM2G154505	Zm00001d039661	GRMZM2G336437
GRMZM2G012404	Zm00001d002003	GRMZM2G045049
GRMZM2G073609	Zm00001d038311	GRMZM2G129247
GRMZM2G087063	Zm00001d014858	GRMZM5G834758
GRMZM2G134334	Zm00001d030652	GRMZM2G048883
GRMZM2G043291	Zm00001d015248	GRMZM2G410393
GRMZM2G091825	Zm00001d007657	AC217415.3_FG004
GRMZM2G076705	Zm00001d038522	GRMZM2G429714
GRMZM2G067915	Zm00001d028863	GRMZM2G317487
GRMZM2G417089	Zm00001d048606	GRMZM5G857620
GRMZM2G347043	Zm00001d005370	GRMZM2G048762
GRMZM2G392710	Zm00001d021677	GRMZM2G468657
GRMZM2G044398	Zm00001d011628	GRMZM2G451147
GRMZM2G416120	Zm00001d016901	GRMZM2G105460
GRMZM6G798998	Zm00001d044656	GRMZM2G439799
GRMZM2G038598	Zm00001d047801	GRMZM2G161293
GRMZM2G086489	Zm00001d041601	GRMZM2G439884
GRMZM2G323672	Zm00001d039106	GRMZM2G132929
GRMZM2G057779	Zm00001d039371	AC205574.3_FG006
GRMZM2G090010	Zm00001d047471	GRMZM2G007922
GRMZM2G119272	Zm00001d021628	GRMZM2G148272
GRMZM2G032218	Zm00001d048614	GRMZM2G008369
GRMZM5G834260	Zm00001d015921	GRMZM2G071089
GRMZM5G806771	Zm00001d039711	GRMZM5G858165
GRMZM2G096553	Zm00001d021207	GRMZM2G069126
GRMZM2G100732	Zm00001d048546	GRMZM5G827026
GRMZM2G107689	Zm00001d001953	GRMZM2G348909
GRMZM2G131939	Zm00001d012969	GRMZM2G002765
GRMZM2G113244	Zm00001d029077	GRMZM2G043948
GRMZM2G074742	Zm00001d002257	GRMZM2G076826
GRMZM2G137535	Zm00001d034853	GRMZM2G024267
GRMZM2G093761	Zm00001d001929	GRMZM2G070389
GRMZM2G051785	Zm00001d020776	GRMZM2G034065
GRMZM2G070508	Zm00001d032449	GRMZM2G345725
GRMZM2G035651	Zm00001d025933	GRMZM2G033746
GRMZM2G082076	Zm00001d006166	AC199782.5_FG002
GRMZM2G108865	Zm00001d005343	GRMZM2G104999
GRMZM2G409430	Zm00001d043125	GRMZM2G024806
GRMZM2G370193	Zm00001d036467	GRMZM2G378770
GRMZM2G152958	Zm00001d005173	GRMZM2G009626
GRMZM2G088819	Zm00001d005917	GRMZM2G066516
GRMZM2G014441	Zm00001d023914	GRMZM2G365888
GRMZM2G324507	Zm00001d001834	GRMZM2G150004
GRMZM2G126594	Zm00001d018074	GRMZM2G335978
GRMZM2G103128	Zm00001d051628	GRMZM2G042356
GRMZM2G359365	Zm00001d026322	GRMZM2G029242
GRMZM2G168833	Zm00001d025055	GRMZM2G159811
GRMZM2G173137	Zm00001d017573	GRMZM2G144097
GRMZM2G123143	Zm00001d015423	GRMZM2G098857
GRMZM5G831712	Zm00001d017457	GRMZM2G097704
GRMZM2G058057	Zm00001d048134	GRMZM5G863344
GRMZM2G003563	Zm00001d001784	GRMZM2G086876
GRMZM2G025200	Zm00001d050019	GRMZM2G054139
GRMZM2G085909	Zm00001d007050	GRMZM2G077500
GRMZM2G009871	Zm00001d025374	GRMZM2G060720
AC203985.4_FG005	Zm00001d039608	GRMZM2G363535
GRMZM2G034069	Zm00001d044898	GRMZM2G174048
GRMZM2G088014	Zm00001d021615	GRMZM2G108849
GRMZM2G161295	Zm00001d051875	GRMZM2G101754
GRMZM2G459363	Zm00001d045422	GRMZM2G144440
GRMZM2G028568	Zm00001d007978	GRMZM2G177165
GRMZM2G073275	Zm00001d043906	GRMZM2G034526
GRMZM2G106028	Zm00001d027271	GRMZM2G052586
GRMZM2G052685	Zm00001d046967	GRMZM2G124421
GRMZM2G135501	Zm00001d008417	GRMZM2G356404
GRMZM2G052515	Zm00001d049379	AC184169.3_FG001
GRMZM2G040298	Zm00001d028371	GRMZM2G157197
GRMZM2G090177	Zm00001d048080	GRMZM2G034575
GRMZM2G095695	Zm00001d046714	GRMZM2G468439
GRMZM2G116004	Zm00001d041395	GRMZM2G145300
GRMZM2G087600	Zm00001d028214	GRMZM2G173067
GRMZM2G178775	Zm00001d024842	GRMZM2G072632
GRMZM2G166665	Zm00001d027393	GRMZM2G167568
GRMZM2G132531	Zm00001d027395	GRMZM2G406204
GRMZM2G154078	Zm00001d013610	GRMZM2G010048
GRMZM2G349745	Zm00001d021225	GRMZM2G073228
GRMZM2G045049	Zm00001d011454	GRMZM2G094165
GRMZM2G085960	Zm00001d021896	GRMZM2G443843
GRMZM2G002568	Zm00001d046621	GRMZM2G160730
GRMZM2G098298	Zm00001d048291	GRMZM2G169384
GRMZM2G177165	Zm00001d006235	GRMZM2G042604
GRMZM2G149969	Zm00001d033671	GRMZM2G469224
GRMZM2G421279	Zm00001d002085	GRMZM2G023163
GRMZM2G139894	Zm00001d011418	GRMZM2G056247
GRMZM2G117064	Zm00001d030316	GRMZM2G009465
GRMZM2G085467	Zm00001d011100	GRMZM2G098153
GRMZM2G154580	Zm00001d049781	GRMZM2G372171
GRMZM2G144726	Zm00001d024365	GRMZM2G121096
GRMZM2G531738	Zm00001d028829	GRMZM2G427418
GRMZM2G144915	Zm00001d025891	GRMZM2G320135
GRMZM2G128215	Zm00001d030149	GRMZM2G394403
GRMZM2G063473	Zm00001d024905	GRMZM2G006871
GRMZM2G116629	Zm00001d001897	GRMZM2G107187
GRMZM2G067546	Zm00001d023784	GRMZM2G005947
GRMZM2G039586	Zm00001d046552	GRMZM2G044805
GRMZM2G145895	Zm00001d051438	GRMZM2G114911
GRMZM2G121565	Zm00001d026104	GRMZM2G116542
GRMZM2G120922	Zm00001d017684	GRMZM2G413829
GRMZM2G088162	Zm00001d053432	GRMZM2G038365
GRMZM5G868679	Zm00001d018158	GRMZM2G103085
GRMZM2G063882	Zm00001d043900	GRMZM2G080499
GRMZM2G100815	Zm00001d049606	GRMZM2G064501
GRMZM2G065822	Zm00001d022592	GRMZM2G307437
GRMZM2G029223	Zm00001d017670	GRMZM2G169000
GRMZM2G081924	Zm00001d032035	GRMZM2G089528
GRMZM2G072406	Zm00001d045599	GRMZM2G049693
GRMZM2G464491	Zm00001d015309	GRMZM5G817948
GRMZM2G437912	Zm00001d020492	GRMZM2G125653
GRMZM2G118950	Zm00001d017308	GRMZM2G153725
GRMZM5G825909	Zm00001d049621	GRMZM2G111247
GRMZM2G097068	Zm00001d017045	GRMZM2G352274
GRMZM2G344388	Zm00001d029856	GRMZM2G079487
GRMZM2G077333	Zm00001d038890	GRMZM2G068703
GRMZM2G049418	Zm00001d003654	GRMZM2G113629
GRMZM2G132958	Zm00001d043662	GRMZM5G863596
GRMZM2G538535	Zm00001d030366	GRMZM2G451856
GRMZM2G423137	Zm00001d016557	GRMZM2G474531
GRMZM2G096228	Zm00001d015442	GRMZM2G536238
AC212068.4_FG005	Zm00001d009750	GRMZM2G350628
GRMZM2G002606	Zm00001d045324	GRMZM5G863550
AC203535.4_FG001	Zm00001d010522	GRMZM2G038401
GRMZM2G409976	Zm00001d002352	GRMZM2G049487
GRMZM2G067183	Zm00001d047814	GRMZM2G151992
GRMZM2G134508	Zm00001d032974	GRMZM2G520535
GRMZM2G046480	Zm00001d023880	GRMZM2G054250
GRMZM2G063431	Zm00001d007839	GRMZM2G042343
GRMZM5G816228	Zm00001d004380	GRMZM2G079616
GRMZM2G430394	Zm00001d006082	GRMZM2G040911
GRMZM2G358987	Zm00001d007870	GRMZM5G805105
GRMZM2G163159	Zm00001d011334	GRMZM2G117754
GRMZM2G327635	Zm00001d006672	GRMZM2G121458
GRMZM2G052688	Zm00001d006673	GRMZM2G121458
AC230013.2_FG007	Zm00001d039821	GRMZM2G163939
GRMZM2G089517	Zm00001d015714	GRMZM2G005592
GRMZM2G158293	Zm00001d039988	GRMZM2G007615
GRMZM2G106308	Zm00001d028903	GRMZM2G013639
GRMZM2G077079	Zm00001d038864	GRMZM2G094884
GRMZM2G106216	Zm00001d030851	GRMZM2G132450
GRMZM2G150367	Zm00001d053108	GRMZM2G158400
GRMZM2G396527	Zm00001d053997	GRMZM2G374088
GRMZM2G156713	Zm00001d023324	GRMZM2G097078
GRMZM2G080045	Zm00001d004740	GRMZM2G087212
GRMZM2G383408	Zm00001d052450	GRMZM2G353301
GRMZM2G019641	Zm00001d029598	GRMZM2G385050
GRMZM2G159237	Zm00001d049502	GRMZM2G055309
GRMZM2G179465	Zm00001d052209	GRMZM2G041699
GRMZM2G169321	Zm00001d006621	GRMZM2G099425
GRMZM2G131943	Zm00001d040360	GRMZM2G022088
GRMZM2G008410	Zm00001d050224	GRMZM2G174732
GRMZM2G012126	Zm00001d037448	GRMZM2G015432
GRMZM2G158384	Zm00001d002313	GRMZM2G337532
GRMZM2G115981	Zm00001d020264	GRMZM2G166692
GRMZM2G033493	Zm00001d053784	GRMZM2G010097
GRMZM2G075712	Zm00001d029932	GRMZM2G161459
GRMZM2G035701	Zm00001d052444	GRMZM2G095141
GRMZM5G885700	Zm00001d039477	GRMZM2G115198
GRMZM2G181390	Zm00001d015945	GRMZM2G091293
GRMZM2G127031	Zm00001d033775	GRMZM2G000622
GRMZM5G801457	Zm00001d040171	AC226235.2_FG003
GRMZM2G059678	Zm00001d017482	GRMZM2G056762
GRMZM2G136599	Zm00001d017089	GRMZM2G029922
GRMZM5G896568	Zm00001d005865	GRMZM2G134866
GRMZM2G058528	Zm00001d030133	GRMZM2G128641
GRMZM2G137775	Zm00001d033839	GRMZM2G143238
GRMZM2G084407	Zm00001d010121	GRMZM2G098712
GRMZM2G012970	Zm00001d011879	GRMZM2G129019
GRMZM5G813661	Zm00001d014596	GRMZM2G048904
GRMZM5G836406	Zm00001d050558	GRMZM2G099136
GRMZM2G433801	Zm00001d006328	GRMZM2G039811
GRMZM5G848603	Zm00001d044802	GRMZM2G102946
GRMZM2G034647	Zm00001d010465	GRMZM2G139565
GRMZM2G701218	Zm00001d033629	GRMZM2G141834
GRMZM2G132069	Zm00001d002814	GRMZM2G109217
GRMZM2G058472	Zm00001d030830	GRMZM2G104494
GRMZM2G015886	Zm00001d035861	GRMZM2G004110
GRMZM2G096972	Zm00001d018959	GRMZM2G018074
GRMZM2G411668	Zm00001d011117	GRMZM2G363429
GRMZM2G016088	Zm00001d031223	GRMZM2G423472
GRMZM2G057778	Zm00001d002153	GRMZM2G406977
GRMZM2G062333	Zm00001d035662	GRMZM2G130173
GRMZM2G126120	Zm00001d042117	GRMZM2G068665
GRMZM2G118362	Zm00001d038529	GRMZM2G157263
GRMZM2G068331	Zm00001d015475	GRMZM2G420012
GRMZM2G114276	Zm00001d018514	GRMZM2G043997
GRMZM2G135300	Zm00001d048890	GRMZM2G099666
GRMZM2G002616	Zm00001d023692	GRMZM2G040389
GRMZM5G857641	Zm00001d046961	GRMZM2G333049
GRMZM2G350319	Zm00001d009783	GRMZM2G086964
GRMZM2G075978	Zm00001d013501	GRMZM2G026157
GRMZM2G160041	Zm00001d003947	GRMZM2G142863
GRMZM2G112795	Zm00001d028245	GRMZM2G411668
GRMZM2G470648	Zm00001d014783	GRMZM5G823891
GRMZM2G056505	Zm00001d024961	GRMZM2G436448
GRMZM2G153488	Zm00001d027307	GRMZM2G329177
GRMZM2G071025	Zm00001d006237	GRMZM2G050268
GRMZM2G423292	Zm00001d024760	GRMZM2G155561
GRMZM2G165422	Zm00001d013566	GRMZM2G166082
AC197705.4_FG007	Zm00001d013567	GRMZM2G166082
GRMZM2G454952	Zm00001d029736	GRMZM2G064466
GRMZM2G467007	Zm00001d038020	GRMZM2G084806
GRMZM2G096962	Zm00001d033925	GRMZM2G416388
GRMZM2G065214	Zm00001d042435	GRMZM2G164165
GRMZM2G119490	Zm00001d006110	GRMZM2G178182
GRMZM2G069389	Zm00001d020103	GRMZM2G367355
GRMZM2G180654	Zm00001d007193	GRMZM2G097568
GRMZM2G457415	Zm00001d023479	GRMZM2G031656
GRMZM2G134073	Zm00001d016173	GRMZM2G407406
GRMZM2G328908	Zm00001d017494	GRMZM2G327266
GRMZM2G117878	Zm00001d031685	GRMZM2G053117
GRMZM2G118870	Zm00001d050831	GRMZM2G007306
GRMZM2G021687	Zm00001d008795	GRMZM2G095280
GRMZM2G108135	Zm00001d028590	GRMZM5G828820
GRMZM2G180205	Zm00001d008279	GRMZM2G049109
GRMZM6G631561	Zm00001d032933	GRMZM2G324390
GRMZM2G057955	Zm00001d027487	GRMZM2G031859
GRMZM2G410766	Zm00001d016435	GRMZM2G151332
GRMZM2G078566	Zm00001d053931	GRMZM2G174568
GRMZM2G087180	Zm00001d051387	GRMZM2G098800
GRMZM5G870446	Zm00001d033634	GRMZM2G036505
GRMZM2G460571	Zm00001d009487	GRMZM2G323387
GRMZM2G446218	Zm00001d038717	GRMZM2G386674
GRMZM2G380286	Zm00001d045314	GRMZM2G405178
GRMZM2G701082	Zm00001d010855	GRMZM2G150367
GRMZM2G066101	Zm00001d017391	GRMZM2G529859
GRMZM2G065480	Zm00001d051374	GRMZM2G102502
GRMZM2G470048	Zm00001d051373	GRMZM2G102502
GRMZM2G150683	Zm00001d012022	GRMZM2G180324
GRMZM2G358924	Zm00001d044156	GRMZM2G014395
GRMZM2G024996	Zm00001d028830	GRMZM2G122965
GRMZM2G143462	Zm00001d038641	GRMZM2G005818
GRMZM2G082384	Zm00001d040623	GRMZM2G368662
GRMZM2G019597	Zm00001d013151	GRMZM2G112548
GRMZM2G158789	Zm00001d036615	GRMZM2G145583
GRMZM2G152408	Zm00001d008756	GRMZM2G375159
GRMZM2G079817	Zm00001d023313	GRMZM2G058531
GRMZM2G094452	Zm00001d012167	GRMZM2G024799
GRMZM2G077206	Zm00001d015550	GRMZM2G070873
GRMZM2G010491	Zm00001d018259	GRMZM5G842517
GRMZM5G887286	Zm00001d015526	GRMZM2G117544
GRMZM2G058591	Zm00001d040888	GRMZM2G174675
GRMZM2G010439	Zm00001d032557	GRMZM2G135866
GRMZM2G142057	Zm00001d009718	GRMZM2G158788
GRMZM2G079668	Zm00001d023736	GRMZM2G137510
GRMZM2G060470	Zm00001d043018	GRMZM2G432662
GRMZM5G866734	Zm00001d022025	GRMZM2G309970
GRMZM2G117300	Zm00001d037234	GRMZM2G348551
GRMZM2G167613	Zm00001d049572	GRMZM2G088549
GRMZM2G388911	Zm00001d002267	GRMZM2G300500
GRMZM2G333916	Zm00001d038196	GRMZM2G121514
GRMZM2G028685	Zm00001d043782	GRMZM2G169654
GRMZM2G313678	Zm00001d023295	GRMZM2G320305
GRMZM2G104989	Zm00001d023296	GRMZM2G320305
GRMZM2G107588	Zm00001d038661	GRMZM2G060324
GRMZM2G115834	Zm00001d033780	GRMZM2G044569
GRMZM2G010941	Zm00001d008222	GRMZM2G304091
GRMZM2G074898	Zm00001d017778	GRMZM2G101350
GRMZM2G103672	Zm00001d006496	GRMZM2G169615
GRMZM2G074818	Zm00001d012337	GRMZM2G056986
GRMZM2G317770	Zm00001d027767	GRMZM2G031718
GRMZM2G032071	Zm00001d016737	AC233850.1_FG005
GRMZM2G029685	Zm00001d045154	AC207265.3_FG002
GRMZM2G107839	Zm00001d036426	GRMZM2G108798
GRMZM2G129493	Zm00001d001929	GRMZM2G070287
GRMZM2G083437	Zm00001d011531	GRMZM2G075092
GRMZM2G341309	Zm00001d037781	GRMZM2G062333
GRMZM2G045366	Zm00001d047993	GRMZM2G177878
GRMZM2G359217	Zm00001d005707	GRMZM2G116196
GRMZM2G367941	Zm00001d042792	GRMZM2G015596
GRMZM2G455321	Zm00001d010536	GRMZM2G035202
GRMZM2G465553	Zm00001d046667	AC233863.1_FG001
GRMZM2G043150	Zm00001d014368	GRMZM2G014427
GRMZM2G143330	Zm00001d002358	GRMZM5G870342
GRMZM5G816784	Zm00001d016453	GRMZM2G038882
GRMZM2G398755	Zm00001d003212	GRMZM2G051984
GRMZM2G402092	Zm00001d018957	GRMZM2G100403
GRMZM2G119246	Zm00001d025959	GRMZM2G123450
GRMZM2G093849	Zm00001d024151	GRMZM2G471362
GRMZM5G815894	Zm00001d025065	GRMZM2G340654
GRMZM2G150406	Zm00001d049648	GRMZM2G302160
AC203957.3_FG004	Zm00001d050929	GRMZM2G356935
GRMZM2G037882	Zm00001d038030	GRMZM5G822317
GRMZM2G151245	Zm00001d041243	GRMZM2G077415
GRMZM2G119761	Zm00001d048690	GRMZM2G126541
GRMZM2G145753	Zm00001d047404	GRMZM2G159956
GRMZM2G125935	Zm00001d008645	GRMZM2G173718
GRMZM2G180471	Zm00001d020550	GRMZM2G339728
GRMZM2G129554	Zm00001d047962	GRMZM2G115925
GRMZM2G150984	Zm00001d033611	GRMZM2G180982
GRMZM2G136306	Zm00001d036741	AC203752.5_FG002
GRMZM2G703858	Zm00001d010535	GRMZM2G336908
GRMZM6G785877	Zm00001d005889	GRMZM2G002142
GRMZM2G019553	Zm00001d040589	GRMZM2G170388
GRMZM2G105400	Zm00001d048027	GRMZM2G392737
AC233888.1_FG001	Zm00001d053995	GRMZM2G374074
GRMZM2G036697	Zm00001d050645	GRMZM2G040843
GRMZM2G162525	Zm00001d035978	AC194005.3_FG004
GRMZM2G111501	Zm00001d025048	GRMZM2G159330
GRMZM2G083763	Zm00001d043113	GRMZM2G357399
GRMZM2G065244	Zm00001d019565	GRMZM2G047368
GRMZM2G039746	Zm00001d031132	GRMZM2G094742
GRMZM2G159908	Zm00001d044089	GRMZM2G088436
GRMZM2G111529	Zm00001d018871	AC200753.3_FG003
GRMZM2G104481	Zm00001d012748	GRMZM2G118462
GRMZM2G396451	Zm00001d008260	GRMZM2G007057
GRMZM2G154211	Zm00001d020002	GRMZM2G131489
AC190623.3_FG001	Zm00001d006865	GRMZM2G109120
GRMZM2G077851	Zm00001d022046	GRMZM2G439281
GRMZM2G179045	Zm00001d011886	GRMZM2G061403
GRMZM2G068239	Zm00001d052434	GRMZM5G877788
GRMZM2G100758	Zm00001d050851	GRMZM2G403915
GRMZM2G043127	Zm00001d028359	GRMZM2G061096
GRMZM2G107696	Zm00001d032931	GRMZM2G068328
GRMZM2G161382	Zm00001d017720	GRMZM2G021270
GRMZM2G171588	Zm00001d013038	AC210013.4_FG002
GRMZM5G887631	Zm00001d018638	GRMZM2G120563
GRMZM2G414727	Zm00001d018639	GRMZM2G120563
GRMZM2G053600	Zm00001d003047	GRMZM2G077420
GRMZM2G167766	Zm00001d043194	GRMZM2G047028
GRMZM2G128579	Zm00001d050157	GRMZM2G417402
GRMZM2G070259	Zm00001d018614	GRMZM2G020104
GRMZM2G177617	Zm00001d045341	GRMZM2G104237
GRMZM2G063566	Zm00001d017706	GRMZM2G045154
GRMZM5G813651	Zm00001d020004	GRMZM2G103047
GRMZM2G069970	Zm00001d027451	GRMZM2G176521
GRMZM2G404897	Zm00001d024318	GRMZM2G046861
GRMZM2G036086	Zm00001d021842	GRMZM2G081782
GRMZM2G386643	Zm00001d023658	GRMZM2G011136
AC204539.4_FG002	Zm00001d011569	GRMZM2G179146
GRMZM2G152548	Zm00001d006197	GRMZM2G015395
GRMZM2G001869	Zm00001d004482	GRMZM2G319454
GRMZM2G007466	Zm00001d028219	GRMZM2G099767
GRMZM2G119521	Zm00001d047840	GRMZM2G179329
GRMZM2G137358	Zm00001d043080	GRMZM5G846140
GRMZM2G403149	Zm00001d015984	GRMZM2G105494
GRMZM2G327692	Zm00001d039385	GRMZM2G093278
GRMZM2G001363	Zm00001d045480	GRMZM2G083012
GRMZM2G080354	Zm00001d047853	GRMZM2G083402
GRMZM2G079616	Zm00001d035007	GRMZM2G040033
GRMZM2G085411	Zm00001d039173	GRMZM2G070659
GRMZM2G571844	Zm00001d002235	GRMZM2G001334
GRMZM2G379540	Zm00001d023260	GRMZM2G043150
GRMZM2G148467	Zm00001d010476	GRMZM2G149286
GRMZM2G546254	Zm00001d051568	GRMZM2G176340
GRMZM2G025171	Zm00001d032530	GRMZM5G868683
GRMZM2G359102	Zm00001d053352	GRMZM2G147772
GRMZM2G162535	Zm00001d012224	GRMZM2G002023
GRMZM2G327595	Zm00001d032605	GRMZM2G346455
GRMZM2G050741	Zm00001d023713	GRMZM2G009048
GRMZM2G481888	Zm00001d052930	GRMZM2G119930
GRMZM5G832175	Zm00001d034161	GRMZM2G138861
GRMZM2G407996	Zm00001d013109	GRMZM2G320506
GRMZM2G016586	Zm00001d004651	GRMZM2G100794
GRMZM2G113052	Zm00001d011288	GRMZM2G057618
GRMZM2G162200	Zm00001d014613	GRMZM2G413006
GRMZM2G121123	Zm00001d018653	GRMZM2G106600
GRMZM2G382774	Zm00001d042345	GRMZM2G025742
GRMZM2G320325	Zm00001d035651	GRMZM2G179069
GRMZM2G042089	Zm00001d030750	GRMZM2G321747
GRMZM2G087094	Zm00001d039870	GRMZM2G100889
GRMZM2G176197	Zm00001d031480	GRMZM2G124557
GRMZM2G021233	Zm00001d044527	GRMZM2G070890
GRMZM2G145133	Zm00001d040160	GRMZM2G171677
GRMZM2G312738	Zm00001d049088	GRMZM5G840928
GRMZM2G166445	Zm00001d008842	GRMZM2G046290
GRMZM2G047299	Zm00001d030962	GRMZM5G831313
GRMZM2G144716	Zm00001d050395	GRMZM2G095552
AC233878.1_FG004	Zm00001d016977	GRMZM5G861269
GRMZM2G128179	Zm00001d046867	GRMZM2G435001
GRMZM2G019325	Zm00001d002457	GRMZM2G162230
GRMZM2G113682	Zm00001d048285	GRMZM2G004023
GRMZM2G010834	Zm00001d013331	GRMZM2G065896
GRMZM2G177259	Zm00001d033473	GRMZM2G134398
GRMZM5G810231	Zm00001d012707	GRMZM2G135586
GRMZM2G415012	Zm00001d041556	GRMZM2G066602
GRMZM2G426802	Zm00001d014753	GRMZM5G823135
GRMZM2G017426	Zm00001d048031	GRMZM2G356579
GRMZM2G149865	Zm00001d052819	GRMZM2G301908
GRMZM5G823891	Zm00001d032379	GRMZM2G447433
GRMZM2G004396	Zm00001d011833	GRMZM2G059191
GRMZM2G135651	Zm00001d028613	GRMZM2G087459
GRMZM2G106732	Zm00001d011507	GRMZM2G171170
GRMZM2G129208	Zm00001d016593	GRMZM2G470756
GRMZM2G154119	Zm00001d009436	GRMZM2G119722
GRMZM5G887054	Zm00001d014655	GRMZM5G817439
GRMZM2G330049	Zm00001d041168	GRMZM2G426467
GRMZM2G068271	Zm00001d003761	GRMZM2G055279
GRMZM2G021589	Zm00001d040268	GRMZM2G314563
GRMZM5G857087	Zm00001d034808	GRMZM2G118005
GRMZM2G133189	Zm00001d025354	GRMZM2G095725
GRMZM2G056661	Zm00001d040212	GRMZM2G099960
GRMZM2G174708	Zm00001d053427	GRMZM2G004741
GRMZM2G099767	Zm00001d033575	GRMZM2G094698
GRMZM5G866082	Zm00001d031161	GRMZM2G073764
GRMZM2G108716	Zm00001d035003	GRMZM2G048313
GRMZM2G180930	Zm00001d002650	GRMZM2G039455
GRMZM2G042516	Zm00001d045230	GRMZM2G002227
GRMZM2G170253	Zm00001d039769	GRMZM2G165044
GRMZM2G076450	Zm00001d023897	GRMZM2G130724
GRMZM2G118363	Zm00001d012088	GRMZM2G022958
GRMZM2G011456	Zm00001d016770	GRMZM2G438622
GRMZM2G140016	Zm00001d045050	GRMZM2G177231
GRMZM2G056365	Zm00001d031634	GRMZM2G041262
GRMZM5G869971	Zm00001d043118	GRMZM2G460866
GRMZM2G088231	Zm00001d026030	AC233979.1_FG009
AC207728.2_FG003	Zm00001d041715	GRMZM2G021471
GRMZM2G022398	Zm00001d009014	GRMZM2G076705
GRMZM2G004988	Zm00001d010899	GRMZM5G834260
GRMZM2G152901	Zm00001d048496	GRMZM2G143244
GRMZM2G121543	Zm00001d024243	GRMZM2G079925
GRMZM2G140998	Zm00001d013954	GRMZM2G005199
GRMZM2G125507	Zm00001d049835	GRMZM2G070693
GRMZM2G007258	Zm00001d048089	GRMZM2G386923
GRMZM6G247892	Zm00001d021566	GRMZM2G163138
GRMZM2G171604	Zm00001d031601	GRMZM2G142357
GRMZM2G026188	Zm00001d031738	GRMZM2G021687
GRMZM2G123089	Zm00001d021491	GRMZM2G397557
GRMZM2G044388	Zm00001d001811	AC190792.2_FG006
GRMZM2G086876	Zm00001d037211	GRMZM2G064993
GRMZM2G031837	Zm00001d049416	GRMZM2G426591
GRMZM2G419606	Zm00001d022420	GRMZM2G348125
GRMZM2G068471	Zm00001d010566	GRMZM2G163561
GRMZM2G113196	Zm00001d033995	GRMZM2G377131
GRMZM2G163713	Zm00001d029896	GRMZM2G113098
GRMZM2G492915	Zm00001d030166	GRMZM2G321940
GRMZM2G150838	Zm00001d008399	GRMZM2G109627
GRMZM2G060857	Zm00001d033919	GRMZM2G131525
GRMZM2G340656	Zm00001d021949	GRMZM2G023346
GRMZM2G012269	Zm00001d004127	GRMZM2G029211
GRMZM2G351304	Zm00001d018242	GRMZM5G862882
GRMZM2G042313	Zm00001d017170	GRMZM2G309368
GRMZM2G077147	Zm00001d032439	GRMZM2G073510
GRMZM2G465806	Zm00001d016508	GRMZM5G837595
GRMZM2G081504	Zm00001d018552	GRMZM6G608324
GRMZM2G158736	Zm00001d010813	AC205471.4_FG008
GRMZM2G069422	Zm00001d048332	GRMZM2G058133
GRMZM2G117776	Zm00001d031204	GRMZM2G093755
GRMZM2G162505	Zm00001d003200	GRMZM2G057113
GRMZM2G012724	Zm00001d003533	GRMZM2G104843
AC233895.1_FG001	Zm00001d002447	GRMZM2G180160
GRMZM2G054522	Zm00001d038117	GRMZM2G142645
GRMZM5G829955	Zm00001d013838	GRMZM2G073934
GRMZM2G327349	Zm00001d014317	GRMZM2G094543
GRMZM2G023847	Zm00001d006699	GRMZM2G156246
GRMZM2G104730	Zm00001d005752	GRMZM2G359521
GRMZM2G131597	Zm00001d029339	GRMZM2G350312
GRMZM2G064133	Zm00001d015477	GRMZM2G083526
GRMZM2G054833	Zm00001d017387	GRMZM2G066885
GRMZM2G037624	Zm00001d001846	GRMZM2G044096
GRMZM2G162369	Zm00001d025362	GRMZM2G027241
GRMZM2G080608	Zm00001d024947	GRMZM2G157812
GRMZM2G072518	Zm00001d019104	GRMZM2G457534
GRMZM2G392477	Zm00001d002094	GRMZM2G372074
GRMZM2G113409	Zm00001d038170	GRMZM2G137151
GRMZM5G835323	Zm00001d009938	GRMZM2G154881
GRMZM2G143777	Zm00001d048323	GRMZM2G178945
GRMZM2G100403	Zm00001d045379	GRMZM2G000645
GRMZM2G040840	Zm00001d014623	GRMZM2G152587
GRMZM2G016477	Zm00001d023853	GRMZM2G141848
GRMZM2G141386	Zm00001d043009	GRMZM2G006229
GRMZM2G101515	Zm00001d038832	GRMZM2G159032
GRMZM2G099285	Zm00001d052253	GRMZM2G041959
GRMZM2G329144	Zm00001d052433	GRMZM2G022799
AC194970.5_FG001	Zm00001d012846	GRMZM2G313678
GRMZM2G160958	Zm00001d049092	GRMZM2G104147
GRMZM2G164359	Zm00001d003897	GRMZM2G399641
GRMZM2G052088	Zm00001d040619	GRMZM2G454056
GRMZM2G362312	Zm00001d038587	AC226373.2_FG010
GRMZM2G465208	Zm00001d026176	GRMZM2G124965
GRMZM2G098056	Zm00001d002250	GRMZM2G443445
GRMZM2G020196	Zm00001d002940	GRMZM2G428386
GRMZM2G012209	Zm00001d042720	GRMZM2G149617
GRMZM2G057388	Zm00001d035153	GRMZM2G449489
GRMZM5G852177	Zm00001d028463	GRMZM5G872118
GRMZM2G130207	Zm00001d050872	GRMZM2G106752
GRMZM2G009014	Zm00001d040475	GRMZM2G130366
GRMZM2G065928	Zm00001d036771	GRMZM2G018280
GRMZM2G138987	Zm00001d039032	GRMZM2G453571
GRMZM2G451806	Zm00001d013625	GRMZM2G079185
GRMZM2G002280	Zm00001d011720	GRMZM2G408706
GRMZM2G040995	Zm00001d046593	AC211394.4_FG004
GRMZM2G118641	Zm00001d003355	GRMZM2G119967
GRMZM2G023313	Zm00001d050051	GRMZM2G085573
GRMZM2G124377	Zm00001d022103	GRMZM2G037444
GRMZM2G414252	Zm00001d012269	GRMZM2G046098
GRMZM2G382077	Zm00001d022172	GRMZM2G079226
GRMZM5G848550	Zm00001d017425	GRMZM2G135385
GRMZM2G042754	Zm00001d012263	GRMZM2G334791
GRMZM2G003342	Zm00001d045496	GRMZM2G167966
GRMZM2G083620	Zm00001d029490	GRMZM2G341271
GRMZM2G386154	Zm00001d014563	GRMZM2G476523
GRMZM2G019335	Zm00001d040726	GRMZM2G165746
GRMZM2G350157	Zm00001d012247	GRMZM2G171116
GRMZM2G000209	Zm00001d028357	GRMZM2G467695
GRMZM2G034828	Zm00001d053586	GRMZM2G168404
GRMZM2G157153	Zm00001d029457	GRMZM2G048324
GRMZM2G326707	Zm00001d029753	GRMZM2G003076
GRMZM2G055154	Zm00001d038685	GRMZM2G120175
GRMZM2G479330	Zm00001d037342	GRMZM2G059634
GRMZM2G387381	Zm00001d012614	GRMZM2G090528
GRMZM2G080168	Zm00001d040309	GRMZM2G132944
GRMZM2G424112	Zm00001d037408	GRMZM2G018369
GRMZM2G455869	Zm00001d006771	GRMZM2G016106
GRMZM2G059865	Zm00001d039414	GRMZM2G035278
GRMZM2G146190	Zm00001d030939	GRMZM2G142660
GRMZM2G406601	Zm00001d047968	GRMZM2G165355
GRMZM2G152552	Zm00001d012847	GRMZM2G013200
GRMZM6G112751	Zm00001d028204	GRMZM2G395121
GRMZM2G145527	Zm00001d004817	GRMZM2G053466
GRMZM2G119689	Zm00001d030691	GRMZM2G077851
GRMZM2G312661	Zm00001d047533	GRMZM2G006080
GRMZM2G159330	Zm00001d037736	GRMZM2G441565
GRMZM2G011631	Zm00001d009946	GRMZM5G856067
GRMZM2G119696	Zm00001d036700	GRMZM2G177095
GRMZM2G037204	Zm00001d014097	GRMZM2G075051
GRMZM2G003426	Zm00001d005301	GRMZM2G088014
GRMZM2G025470	Zm00001d028906	GRMZM2G394203
GRMZM2G448368	Zm00001d029840	GRMZM2G464885
GRMZM2G363229	Zm00001d024598	GRMZM2G096367
GRMZM2G158197	Zm00001d044680	AC194362.3_FG003
GRMZM2G322090	Zm00001d006041	GRMZM2G446050
GRMZM2G124744	Zm00001d044693	GRMZM2G000660
GRMZM2G149802	Zm00001d048324	GRMZM2G178960
GRMZM2G394410	Zm00001d023237	GRMZM2G098603
GRMZM2G171478	Zm00001d031471	GRMZM2G056056
GRMZM2G172001	Zm00001d004997	GRMZM2G064896
GRMZM2G159948	Zm00001d042611	GRMZM2G368411
GRMZM2G165966	Zm00001d022401	GRMZM2G009265
GRMZM2G074082	Zm00001d027324	GRMZM2G006673
GRMZM6G591706	Zm00001d002971	GRMZM2G021694
GRMZM2G169432	Zm00001d023707	GRMZM2G181258
GRMZM2G008287	Zm00001d029595	GRMZM2G084063
GRMZM2G018946	Zm00001d012050	GRMZM2G107498
GRMZM2G139035	Zm00001d043796	GRMZM2G359076
GRMZM2G340130	Zm00001d038150	GRMZM2G359365
GRMZM2G036543	Zm00001d021056	GRMZM5G806833
GRMZM2G026560	Zm00001d030579	GRMZM2G152526
GRMZM2G420743	Zm00001d034055	GRMZM2G024231
GRMZM2G142315	Zm00001d034183	GRMZM2G072682
GRMZM2G077842	Zm00001d042624	GRMZM2G167637
GRMZM2G106730	Zm00001d042625	GRMZM2G167637
GRMZM2G111123	Zm00001d022434	GRMZM2G080001
GRMZM2G165867	Zm00001d007043	GRMZM2G060160
GRMZM2G121468	Zm00001d032810	GRMZM2G144782
GRMZM2G317386	Zm00001d036940	GRMZM2G045686
GRMZM2G148702	Zm00001d020011	GRMZM2G078754
GRMZM2G161435	Zm00001d041758	GRMZM2G084647
GRMZM2G155943	Zm00001d017103	GRMZM2G121166
GRMZM2G003625	Zm00001d023238	GRMZM2G098596
GRMZM2G032219	Zm00001d028601	GRMZM2G179432
GRMZM2G077227	Zm00001d043467	GRMZM2G004617
GRMZM2G323936	Zm00001d034624	GRMZM2G405690
GRMZM5G824920	Zm00001d052312	GRMZM2G111720
GRMZM2G022945	Zm00001d010425	GRMZM2G157332
GRMZM2G395983	Zm00001d032473	GRMZM2G031893
GRMZM2G047139	Zm00001d002970	GRMZM2G021786
GRMZM2G103785	Zm00001d021356	GRMZM2G357040
GRMZM2G076539	Zm00001d014703	GRMZM2G089132
GRMZM2G469142	Zm00001d049929	GRMZM2G014069
GRMZM2G324886	Zm00001d017274	GRMZM2G074604
GRMZM2G167336	Zm00001d022114	GRMZM2G157598
GRMZM2G324471	Zm00001d017979	GRMZM2G163325
GRMZM2G163407	Zm00001d038133	GRMZM2G117298
GRMZM2G149681	Zm00001d027322	GRMZM2G086269
GRMZM2G450659	Zm00001d027351	GRMZM2G426802
GRMZM2G014099	Zm00001d047078	GRMZM2G035928
GRMZM2G116133	Zm00001d038172	GRMZM2G025074
GRMZM2G122937	Zm00001d043989	GRMZM2G382632
GRMZM2G119359	Zm00001d050254	GRMZM2G376825
GRMZM2G024775	Zm00001d047675	GRMZM5G896604
GRMZM2G024708	Zm00001d037846	GRMZM2G061980
GRMZM2G160838	Zm00001d043974	GRMZM2G344848
GRMZM2G038827	Zm00001d046234	GRMZM2G126900
GRMZM2G387569	Zm00001d039963	GRMZM2G126749
GRMZM2G092101	Zm00001d038070	GRMZM2G023683
AC214267.3_FG010	Zm00001d048298	GRMZM2G074514
GRMZM2G041175	Zm00001d041142	GRMZM2G074373
GRMZM2G012728	Zm00001d015226	GRMZM2G010920
GRMZM5G892642	Zm00001d010031	GRMZM2G023755
GRMZM2G300348	Zm00001d042841	GRMZM5G856598
GRMZM2G094639	Zm00001d020972	GRMZM2G033884
GRMZM2G374385	Zm00001d013485	GRMZM2G102475
GRMZM5G801409	Zm00001d017378	GRMZM2G169994
GRMZM5G854334	Zm00001d002240	GRMZM2G073743
GRMZM2G145024	Zm00001d043839	GRMZM5G863146
GRMZM2G106921	Zm00001d003852	GRMZM2G165063
GRMZM2G041822	Zm00001d006527	GRMZM2G175874
GRMZM2G066500	Zm00001d006315	AC233910.1_FG001
GRMZM2G021706	Zm00001d014386	GRMZM2G427729
GRMZM2G001639	Zm00001d036477	GRMZM2G161493
GRMZM2G088053	Zm00001d017195	GRMZM2G443548
GRMZM2G138967	Zm00001d020158	GRMZM2G115670
GRMZM2G151975	Zm00001d041852	GRMZM2G420310
GRMZM2G008497	Zm00001d025166	GRMZM2G139512
GRMZM2G056403	Zm00001d048252	GRMZM2G100120
GRMZM2G032430	Zm00001d051420	GRMZM2G373522
GRMZM2G127117	Zm00001d008939	GRMZM2G373928
GRMZM5G833774	Zm00001d045825	GRMZM2G033029
GRMZM2G177356	Zm00001d028736	GRMZM2G024159
GRMZM2G162450	Zm00001d033475	GRMZM2G134450
GRMZM2G022269	Zm00001d044246	GRMZM2G047813
GRMZM2G305124	Zm00001d009288	GRMZM2G051790
GRMZM2G056357	Zm00001d012581	GRMZM2G132251
GRMZM2G388892	Zm00001d052367	GRMZM5G886096
GRMZM2G127312	Zm00001d031187	GRMZM2G067162
GRMZM2G149073	Zm00001d039993	GRMZM2G360023
GRMZM2G060522	Zm00001d048190	GRMZM2G114758
GRMZM2G497710	Zm00001d003685	GRMZM2G107588
GRMZM2G084825	Zm00001d014950	GRMZM2G053676
GRMZM2G131448	Zm00001d011213	AC196426.3_FG007
GRMZM2G025255	Zm00001d039911	GRMZM2G022897
GRMZM2G017249	Zm00001d042446	AC209810.3_FG002
GRMZM2G171428	Zm00001d008952	GRMZM2G453565
GRMZM2G310674	Zm00001d036568	GRMZM2G094074
GRMZM2G161641	Zm00001d038489	GRMZM2G701206
GRMZM5G860976	Zm00001d010116	GRMZM2G107721
GRMZM2G131476	Zm00001d008539	GRMZM2G444567
GRMZM2G180612	Zm00001d013421	GRMZM2G347645
GRMZM2G152739	Zm00001d025793	GRMZM2G071518
GRMZM2G060720	Zm00001d024676	GRMZM2G306105
GRMZM2G123355	Zm00001d013141	GRMZM2G130678
GRMZM2G071518	Zm00001d004546	GRMZM2G039029
GRMZM2G069807	Zm00001d042152	GRMZM2G155348
GRMZM2G099491	Zm00001d003468	GRMZM2G442523
GRMZM2G090528	Zm00001d024470	GRMZM2G133512
AC149475.2_FG002	Zm00001d043745	GRMZM2G420334
GRMZM2G068917	Zm00001d046226	GRMZM2G113203
GRMZM2G128080	Zm00001d051336	GRMZM2G037204
AC216010.3_FG001	Zm00001d045517	GRMZM2G071602
GRMZM2G100158	Zm00001d053873	GRMZM2G153899
GRMZM2G412440	Zm00001d014412	GRMZM2G166430
GRMZM2G071959	Zm00001d049725	GRMZM5G863229
GRMZM2G099328	Zm00001d033817	GRMZM2G477879
GRMZM2G450937	Zm00001d022205	GRMZM2G310283
GRMZM5G801875	Zm00001d003780	GRMZM5G876811
GRMZM2G386229	Zm00001d032571	GRMZM2G449083
GRMZM2G126781	Zm00001d026577	GRMZM2G340065
GRMZM2G471779	Zm00001d037367	GRMZM2G104511
GRMZM2G089721	Zm00001d052062	GRMZM2G070239
GRMZM2G350802	Zm00001d043036	GRMZM2G092517
GRMZM2G181018	Zm00001d039637	GRMZM2G348238
GRMZM2G170927	Zm00001d041958	AC165171.2_FG002
GRMZM2G049549	Zm00001d048336	GRMZM2G420926
GRMZM2G360352	Zm00001d052167	GRMZM2G173771
GRMZM5G818791	Zm00001d007271	GRMZM2G375517
GRMZM2G145123	Zm00001d050195	GRMZM2G148561
GRMZM2G129879	Zm00001d016100	GRMZM2G095082
AC196278.2_FG004	Zm00001d038665	GRMZM2G009400
GRMZM2G113618	Zm00001d004458	GRMZM2G367367
GRMZM2G073693	Zm00001d052205	GRMZM2G448883
GRMZM2G094444	Zm00001d049632	GRMZM2G007587
GRMZM2G080842	Zm00001d019413	GRMZM2G469175
GRMZM5G844257	Zm00001d036778	GRMZM2G096431
GRMZM5G842071	Zm00001d027308	GRMZM2G028870
GRMZM5G882285	Zm00001d002051	GRMZM2G081886
GRMZM2G125931	Zm00001d050768	GRMZM2G096171
GRMZM2G053111	Zm00001d042095	GRMZM2G127789
GRMZM2G122327	Zm00001d049174	GRMZM2G135019
GRMZM2G176995	Zm00001d030557	GRMZM5G828630
GRMZM2G441722	Zm00001d028238	AC197545.3_FG002
GRMZM2G064613	Zm00001d024644	GRMZM2G112764
GRMZM2G102475	Zm00001d016140	GRMZM2G358711
GRMZM2G163572	Zm00001d009500	GRMZM2G013465
GRMZM2G092607	Zm00001d018864	GRMZM2G107309
GRMZM2G072584	Zm00001d050884	GRMZM2G118957
GRMZM2G163054	Zm00001d006103	GRMZM2G179031
GRMZM2G117900	Zm00001d013175	GRMZM2G438400
GRMZM2G319781	Zm00001d047587	GRMZM2G426964
GRMZM2G175000	Zm00001d003800	GRMZM2G074914
GRMZM2G419409	Zm00001d043500	GRMZM2G156016
GRMZM2G095299	Zm00001d036016	GRMZM2G069335
GRMZM2G111533	Zm00001d003155	GRMZM2G081689
GRMZM2G063462	Zm00001d046986	GRMZM2G465383
GRMZM2G000775	Zm00001d039787	GRMZM2G102196
GRMZM2G043983	Zm00001d039434	GRMZM2G471089
GRMZM2G076778	Zm00001d001765	GRMZM2G074530
GRMZM2G090609	Zm00001d023302	AC234175.1_FG010
GRMZM2G146358	Zm00001d017008	GRMZM2G083855
GRMZM2G360698	Zm00001d039394	GRMZM2G031432
GRMZM2G013777	Zm00001d020728	GRMZM2G479068
GRMZM2G100988	Zm00001d015513	GRMZM2G057328
GRMZM2G134182	Zm00001d007320	GRMZM2G057237
GRMZM2G169087	Zm00001d009745	GRMZM2G430027
GRMZM2G323679	Zm00001d031216	GRMZM2G174554
GRMZM5G884325	Zm00001d010519	GRMZM2G174370
GRMZM2G101499	Zm00001d011827	GRMZM2G133885
GRMZM2G044900	Zm00001d040186	GRMZM2G163975
GRMZM2G147623	Zm00001d027932	GRMZM2G496991
GRMZM2G112912	Zm00001d040695	GRMZM2G378547
GRMZM2G335019	Zm00001d023733	GRMZM2G009795
GRMZM2G394500	Zm00001d034160	GRMZM2G124540
GRMZM2G010085	Zm00001d005029	GRMZM2G015080
GRMZM2G082097	Zm00001d044662	GRMZM2G353076
GRMZM2G067063	Zm00001d051461	GRMZM2G028438
GRMZM2G138770	Zm00001d048154	GRMZM2G081729
GRMZM2G117412	Zm00001d032659	GRMZM2G079428
GRMZM2G409372	Zm00001d024819	GRMZM2G097605
GRMZM2G404608	Zm00001d037104	GRMZM5G856338
AC189795.3_FG001	Zm00001d036080	GRMZM2G386051
GRMZM2G475948	Zm00001d007823	GRMZM2G018607
GRMZM2G151268	Zm00001d041390	GRMZM2G095331
GRMZM2G302074	Zm00001d052795	GRMZM2G440925
GRMZM2G421491	Zm00001d025059	GRMZM2G166141
GRMZM2G140602	Zm00001d014486	GRMZM2G043147
GRMZM2G019562	Zm00001d029209	AC204530.4_FG006
GRMZM2G145951	Zm00001d021120	GRMZM2G166897
GRMZM2G424651	Zm00001d028187	GRMZM2G107815
GRMZM5G819452	Zm00001d003174	GRMZM2G135277
GRMZM2G012233	Zm00001d030348	GRMZM2G152975
GRMZM2G038931	Zm00001d036532	GRMZM2G333875
GRMZM2G373435	Zm00001d031570	GRMZM2G096806
GRMZM2G069444	Zm00001d013644	GRMZM2G112149
GRMZM2G053397	Zm00001d016014	GRMZM2G346095
GRMZM2G133895	Zm00001d010798	GRMZM2G106819
GRMZM2G046933	Zm00001d012988	GRMZM2G165255
GRMZM2G061990	Zm00001d051863	GRMZM2G024331
GRMZM2G174675	Zm00001d034672	GRMZM2G093246
GRMZM2G101707	Zm00001d026126	GRMZM2G142832
GRMZM5G849107	Zm00001d010940	GRMZM2G090928
GRMZM2G004382	Zm00001d037814	GRMZM2G100133
GRMZM2G088356	Zm00001d053042	GRMZM2G103013
GRMZM2G380561	Zm00001d006389	GRMZM2G034410
GRMZM2G171372	Zm00001d016128	GRMZM2G412436
GRMZM2G054465	Zm00001d041707	GRMZM2G034453
GRMZM2G179802	Zm00001d005322	GRMZM2G442555
GRMZM5G840703	Zm00001d046399	GRMZM2G150323
GRMZM2G027272	Zm00001d051233	GRMZM2G146786
GRMZM2G108712	Zm00001d017550	GRMZM2G141503
GRMZM2G059039	Zm00001d048104	GRMZM2G100473
GRMZM5G898314	Zm00001d010945	GRMZM2G017522
GRMZM5G866334	Zm00001d012121	GRMZM2G104179
GRMZM2G089696	Zm00001d038909	GRMZM2G061663
GRMZM5G846057	Zm00001d015131	GRMZM2G009365
GRMZM2G336815	Zm00001d034249	GRMZM2G068179
GRMZM2G383623	Zm00001d017979	GRMZM5G870253
GRMZM2G104258	Zm00001d052842	GRMZM2G033952
GRMZM2G169645	Zm00001d003606	GRMZM2G146694
GRMZM2G045748	Zm00001d042094	GRMZM2G066005
GRMZM2G151387	Zm00001d038268	AC235543.1_FG002
GRMZM2G062421	Zm00001d031290	GRMZM2G005840
GRMZM2G151285	Zm00001d045490	GRMZM2G050333
GRMZM2G019251	Zm00001d002052	GRMZM2G082032
AC235546.1_FG001	Zm00001d010269	GRMZM2G047152
GRMZM2G131525	Zm00001d044669	GRMZM2G043843
GRMZM2G155931	Zm00001d010604	GRMZM2G065593
GRMZM5G822593	Zm00001d011765	GRMZM2G176301
GRMZM2G050076	Zm00001d035082	GRMZM2G009025
GRMZM2G161670	Zm00001d006167	AC199782.5_FG001
GRMZM2G055667	Zm00001d043556	GRMZM2G158645
GRMZM2G381404	Zm00001d012673	GRMZM2G124321
GRMZM2G013170	Zm00001d016200	GRMZM2G014444
GRMZM2G047969	Zm00001d042137	GRMZM2G363801
GRMZM2G531719	Zm00001d006246	GRMZM2G114107
GRMZM2G153523	Zm00001d015308	GRMZM2G085469
GRMZM2G005619	Zm00001d034856	GRMZM2G022269
GRMZM2G098227	Zm00001d018144	GRMZM2G012178
GRMZM2G050268	Zm00001d042398	GRMZM2G133173
GRMZM2G074404	Zm00001d033396	GRMZM2G018414
GRMZM2G071307	Zm00001d014181	GRMZM2G466835
GRMZM2G056916	Zm00001d044328	GRMZM2G087628
GRMZM2G011878	Zm00001d005977	GRMZM2G018004
GRMZM2G174137	Zm00001d024807	GRMZM2G089484
GRMZM2G099305	Zm00001d012935	GRMZM2G420823
GRMZM2G180909	Zm00001d042520	GRMZM2G041847
GRMZM5G882078	Zm00001d020585	GRMZM2G073275
GRMZM2G137847	Zm00001d003127	GRMZM2G083253
GRMZM2G431114	Zm00001d018454	GRMZM5G806449
GRMZM2G024150	Zm00001d053626	GRMZM2G171423
GRMZM2G086365	Zm00001d005802	GRMZM2G045243
GRMZM2G017961	Zm00001d020595	GRMZM2G052667
GRMZM2G300589	Zm00001d007433	GRMZM2G114948
GRMZM2G139882	Zm00001d052493	GRMZM2G119219
GRMZM2G044128	Zm00001d021489	GRMZM2G131275
GRMZM2G102737	Zm00001d025919	GRMZM2G468693
GRMZM2G040803	Zm00001d052890	GRMZM2G460544
GRMZM2G095595	Zm00001d002160	GRMZM2G106445
GRMZM2G007590	Zm00001d047614	GRMZM2G112428
GRMZM2G121186	Zm00001d053568	GRMZM2G154505
GRMZM2G180578	Zm00001d042011	GRMZM2G071433
GRMZM2G166639	Zm00001d036010	GRMZM2G479703
GRMZM2G056867	Zm00001d034705	GRMZM2G081114
AC204868.3_FG004	Zm00001d038577	GRMZM2G088951
GRMZM2G306935	Zm00001d024600	GRMZM2G333183
GRMZM2G086761	Zm00001d024499	GRMZM2G113682
GRMZM2G357660	Zm00001d010321	GRMZM2G097457
GRMZM2G081829	Zm00001d007960	GRMZM2G070542
GRMZM2G099980	Zm00001d021846	GRMZM2G081155
GRMZM2G040268	Zm00001d040641	GRMZM2G139892
GRMZM2G098517	Zm00001d052340	GRMZM2G113967
GRMZM2G397261	Zm00001d005748	GRMZM2G330049
GRMZM2G464523	Zm00001d006160	GRMZM2G164956
GRMZM2G178356	Zm00001d021787	GRMZM2G057475
GRMZM2G074631	Zm00001d025738	GRMZM2G062037
GRMZM2G044198	Zm00001d053759	GRMZM2G421240
GRMZM2G030299	Zm00001d028117	GRMZM5G863656
GRMZM2G021530	Zm00001d029550	GRMZM2G019562
GRMZM2G057789	Zm00001d044307	AC217499.3_FG001
GRMZM2G068496	Zm00001d035672	GRMZM2G089575
GRMZM2G054093	Zm00001d041703	GRMZM2G049902
GRMZM2G006871	Zm00001d027259	GRMZM2G032104
GRMZM2G113720	Zm00001d009083	GRMZM2G086897
GRMZM2G120329	Zm00001d031534	GRMZM2G005652
GRMZM2G100146	Zm00001d030213	GRMZM2G084825
GRMZM2G003979	Zm00001d021729	GRMZM5G889999
GRMZM2G102216	Zm00001d025717	GRMZM2G005865
GRMZM2G337532	Zm00001d004339	GRMZM2G360907
GRMZM2G348890	Zm00001d022406	AC234159.1_FG002
GRMZM2G028156	Zm00001d011099	GRMZM2G098031
GRMZM5G813886	Zm00001d019515	GRMZM2G071877
GRMZM5G875999	Zm00001d040155	GRMZM2G013471
GRMZM2G071370	Zm00001d016649	GRMZM2G095811
GRMZM5G837123	Zm00001d020612	GRMZM2G469409
GRMZM2G066274	Zm00001d019108	GRMZM2G398527
GRMZM2G069773	Zm00001d041362	AC230011.2_FG002
GRMZM2G433579	Zm00001d054011	GRMZM2G006069
GRMZM2G002391	Zm00001d045568	GRMZM2G367650
GRMZM5G818431	Zm00001d026258	GRMZM2G128934
GRMZM6G929553	Zm00001d015437	AC212467.3_FG001
AC185422.3_FG005	Zm00001d039370	GRMZM2G102572
GRMZM2G069765	Zm00001d010388	GRMZM2G382035
GRMZM5G800723	Zm00001d048166	GRMZM2G481888
GRMZM2G034302	Zm00001d005789	GRMZM2G057852
GRMZM2G336065	Zm00001d013135	GRMZM5G874903
GRMZM2G084429	Zm00001d043083	GRMZM2G050089
GRMZM2G423169	Zm00001d028374	GRMZM2G055052
GRMZM2G467069	Zm00001d046444	GRMZM2G022558
GRMZM2G313553	Zm00001d012391	GRMZM2G028535
GRMZM2G014089	Zm00001d008540	GRMZM2G095964
GRMZM2G022619	Zm00001d016824	GRMZM2G149865
GRMZM2G002286	Zm00001d035512	GRMZM2G416701
GRMZM2G481194	Zm00001d052692	GRMZM2G058120
GRMZM2G002626	Zm00001d053171	GRMZM2G051502
GRMZM2G009232	Zm00001d011179	GRMZM2G010836
GRMZM5G872256	Zm00001d029868	GRMZM2G114906
GRMZM2G105598	Zm00001d010684	GRMZM2G410318
GRMZM2G347280	Zm00001d014253	GRMZM2G173596
GRMZM6G709972	Zm00001d002542	GRMZM2G479665
GRMZM2G082365	Zm00001d009612	GRMZM2G157153
GRMZM2G107388	Zm00001d020180	GRMZM5G843174
GRMZM2G137707	Zm00001d039006	GRMZM2G030710
GRMZM2G140917	Zm00001d047081	GRMZM2G101058
GRMZM2G408305	Zm00001d051901	GRMZM2G123544
GRMZM2G443939	Zm00001d046155	GRMZM2G102322
GRMZM2G702991	Zm00001d053923	GRMZM2G060451
GRMZM2G173309	Zm00001d013641	GRMZM2G037146
GRMZM2G066528	Zm00001d008727	GRMZM2G061969
GRMZM2G062638	Zm00001d019214	GRMZM2G472096
GRMZM2G014444	Zm00001d054046	GRMZM2G380015
GRMZM2G097841	Zm00001d012251	GRMZM5G827798
GRMZM2G458728	Zm00001d029676	GRMZM2G389196
GRMZM2G070271	Zm00001d043517	GRMZM2G159171
GRMZM2G044074	Zm00001d043296	GRMZM5G877838
GRMZM2G139441	Zm00001d007785	GRMZM2G024808
GRMZM2G402584	Zm00001d020006	GRMZM2G409131
GRMZM5G801949	Zm00001d016567	GRMZM2G124026
GRMZM2G026639	Zm00001d021517	GRMZM5G892787
GRMZM2G008175	Zm00001d034581	GRMZM2G116908
GRMZM2G180458	Zm00001d011771	GRMZM2G138967
GRMZM2G068936	Zm00001d016640	GRMZM2G136296
GRMZM2G003732	Zm00001d033362	GRMZM2G082696
GRMZM2G027105	Zm00001d039014	GRMZM2G020928
GRMZM2G041328	Zm00001d043814	GRMZM2G019738
GRMZM2G148133	Zm00001d003515	GRMZM2G062559
GRMZM2G108396	Zm00001d032821	GRMZM2G118173
GRMZM2G301642	Zm00001d018939	GRMZM2G039280
GRMZM2G157605	Zm00001d040429	GRMZM2G048335
GRMZM2G323499	Zm00001d047710	GRMZM2G083186
GRMZM2G060183	Zm00001d048832	GRMZM2G453672
GRMZM2G024354	Zm00001d004925	GRMZM2G403562
GRMZM2G087740	Zm00001d032819	GRMZM2G118433
GRMZM2G030873	Zm00001d039037	GRMZM2G165679
GRMZM2G049347	Zm00001d020296	GRMZM2G016551
GRMZM2G130305	Zm00001d028294	GRMZM2G476914
GRMZM2G009843	Zm00001d033231	GRMZM5G859316
GRMZM2G027007	Zm00001d046743	GRMZM2G041022
GRMZM2G017186	Zm00001d026359	GRMZM2G148594
GRMZM2G018770	Zm00001d003924	GRMZM5G829946
GRMZM2G410831	Zm00001d026053	GRMZM2G397684
GRMZM2G014043	Zm00001d020512	GRMZM2G416184
GRMZM2G400135	Zm00001d014204	GRMZM2G018082
GRMZM2G049693	Zm00001d016286	GRMZM5G873594
GRMZM2G018020	Zm00001d005538	GRMZM2G167886
GRMZM2G175453	Zm00001d038351	GRMZM2G093272
GRMZM2G093272	Zm00001d048400	AC149818.2_FG008
GRMZM2G356076	Zm00001d025699	GRMZM2G051852
GRMZM2G009265	Zm00001d048958	GRMZM2G113373
GRMZM2G039895	Zm00001d042449	GRMZM2G025414
GRMZM2G119999	Zm00001d023330	GRMZM2G005134
GRMZM2G453879	Zm00001d006864	GRMZM2G098859
GRMZM5G846339	Zm00001d004966	GRMZM2G026556
GRMZM2G157679	Zm00001d048123	GRMZM2G479245
AC197056.3_FG005	Zm00001d014244	GRMZM2G087827
GRMZM5G867798	Zm00001d031561	GRMZM5G828396
GRMZM2G135795	Zm00001d053234	GRMZM2G481440
AC209636.2_FG003	Zm00001d013692	GRMZM2G018943
GRMZM2G018103	Zm00001d052233	GRMZM2G021605
GRMZM2G065423	Zm00001d007181	GRMZM2G031329
GRMZM2G479608	Zm00001d038269	GRMZM2G084899
GRMZM2G330690	Zm00001d022073	GRMZM2G151801
GRMZM2G172537	Zm00001d052799	GRMZM5G868730
GRMZM2G107645	Zm00001d048503	GRMZM2G467007
GRMZM2G061485	Zm00001d034170	GRMZM2G353114
GRMZM2G022242	Zm00001d034171	GRMZM2G353114
GRMZM2G100583	Zm00001d034169	GRMZM2G353114
GRMZM2G340527	Zm00001d024783	GRMZM2G062541
GRMZM2G180082	Zm00001d042151	GRMZM2G155334
GRMZM5G896834	Zm00001d011581	GRMZM2G055936
GRMZM2G102829	Zm00001d027809	GRMZM2G123986
GRMZM2G108147	Zm00001d053827	GRMZM2G401869
AC198937.4_FG003	Zm00001d053826	GRMZM2G401869
GRMZM2G345700	Zm00001d044116	GRMZM2G180815
GRMZM2G136887	Zm00001d041005	GRMZM2G416913
GRMZM2G158918	Zm00001d024520	GRMZM2G145123
GRMZM2G153924	Zm00001d002091	GRMZM2G071119
GRMZM2G017229	Zm00001d028317	GRMZM2G043584
GRMZM6G910222	Zm00001d017563	GRMZM2G106185
GRMZM2G063949	Zm00001d025544	GRMZM5G848550
GRMZM2G347605	Zm00001d028784	GRMZM2G032182
GRMZM2G092311	Zm00001d010093	GRMZM2G050625
GRMZM2G005583	Zm00001d023901	GRMZM5G883764
GRMZM2G159142	Zm00001d039461	GRMZM2G068322
GRMZM2G077340	Zm00001d034933	AC177899.2_FG009
GRMZM2G045678	Zm00001d004855	GRMZM2G006765
GRMZM2G082677	Zm00001d030733	GRMZM2G446047
GRMZM2G001327	Zm00001d015196	GRMZM2G054833
GRMZM2G075260	Zm00001d011969	GRMZM2G134073
GRMZM2G076474	Zm00001d021054	GRMZM2G168332
GRMZM2G131245	Zm00001d036535	GRMZM2G175562
GRMZM2G136901	Zm00001d027293	GRMZM2G060296
GRMZM2G127853	Zm00001d045889	GRMZM2G074085
GRMZM2G080129	Zm00001d004301	GRMZM2G045473
GRMZM2G090929	Zm00001d038203	GRMZM2G425230
GRMZM2G162668	Zm00001d005238	GRMZM2G151549
GRMZM2G476538	Zm00001d026072	GRMZM2G424112
GRMZM2G141941	Zm00001d005080	GRMZM5G890665
GRMZM2G472696	Zm00001d048621	GRMZM2G308860
GRMZM2G111216	Zm00001d036727	GRMZM5G848603
GRMZM2G012628	Zm00001d052488	AC217271.3_FG001
GRMZM2G355342	Zm00001d051934	GRMZM2G099297
GRMZM2G032104	Zm00001d039002	GRMZM2G122750
GRMZM2G098278	Zm00001d023420	GRMZM2G338454
GRMZM2G031479	Zm00001d001944	GRMZM2G018692
GRMZM2G085604	Zm00001d030310	GRMZM2G129413
GRMZM2G164542	Zm00001d045839	GRMZM2G400694
GRMZM2G139643	Zm00001d052252	GRMZM2G041809
GRMZM2G431504	Zm00001d035918	GRMZM2G102790
GRMZM2G138131	Zm00001d038584	GRMZM2G020016
GRMZM2G070515	Zm00001d018209	GRMZM2G084086
GRMZM5G832229	Zm00001d044287	GRMZM2G116135
GRMZM2G429254	Zm00001d010924	GRMZM2G365774
GRMZM2G004305	Zm00001d028217	GRMZM2G099522
GRMZM2G115901	Zm00001d050735	GRMZM2G134563
GRMZM2G387076	Zm00001d012019	GRMZM2G003493
GRMZM2G111394	Zm00001d001962	GRMZM2G062354
GRMZM2G038365	Zm00001d013271	GRMZM2G172011
GRMZM2G118579	Zm00001d053805	GRMZM2G041060
GRMZM2G024264	Zm00001d036418	GRMZM2G116475
GRMZM2G068952	Zm00001d030345	AC210517.3_FG003
GRMZM2G067985	Zm00001d021444	GRMZM2G053315
GRMZM2G159744	Zm00001d014495	GRMZM2G066103
GRMZM2G130366	Zm00001d017387	GRMZM2G066851
GRMZM2G004878	Zm00001d016294	GRMZM2G154987
GRMZM5G866627	Zm00001d011854	GRMZM2G180988
GRMZM2G006973	Zm00001d052247	GRMZM2G161566
GRMZM2G009136	Zm00001d028425	GRMZM2G170382
GRMZM2G075140	Zm00001d042005	GRMZM2G139462
GRMZM2G137409	Zm00001d010537	GRMZM5G883149
GRMZM2G074252	Zm00001d014753	AC209898.2_FG004
GRMZM2G100976	Zm00001d014291	GRMZM2G071087
GRMZM2G145280	Zm00001d022120	GRMZM2G116426
GRMZM2G302701	Zm00001d053686	GRMZM2G064268
GRMZM2G139324	Zm00001d053151	GRMZM2G458728
GRMZM2G015344	Zm00001d013787	GRMZM2G124918
GRMZM2G102346	Zm00001d013531	GRMZM2G470671
GRMZM2G058138	Zm00001d018386	GRMZM5G836910
GRMZM2G314396	Zm00001d049282	GRMZM2G007012
GRMZM2G139300	Zm00001d006317	AC233910.1_FG004
GRMZM2G003692	Zm00001d007290	GRMZM2G158240
GRMZM2G021573	Zm00001d025721	GRMZM2G047143
GRMZM2G151516	Zm00001d027516	GRMZM2G132019
GRMZM2G064159	Zm00001d010965	GRMZM2G054588
GRMZM2G393897	Zm00001d032284	GRMZM2G141214
GRMZM2G466394	Zm00001d042039	GRMZM2G060536
GRMZM2G099045	Zm00001d011500	GRMZM2G086088
GRMZM2G059252	Zm00001d052859	GRMZM2G083411
GRMZM2G063896	Zm00001d039426	GRMZM2G055313
GRMZM2G020104	Zm00001d046471	GRMZM2G051135
GRMZM2G180160	Zm00001d027323	GRMZM5G802392
GRMZM2G056093	Zm00001d019247	GRMZM2G032528
GRMZM2G080462	Zm00001d044285	GRMZM2G116584
GRMZM2G030598	Zm00001d002521	GRMZM2G024517
GRMZM2G017334	Zm00001d006185	GRMZM2G148769
GRMZM2G141665	Zm00001d010230	GRMZM2G164797
GRMZM2G170591	Zm00001d004524	GRMZM2G076343
GRMZM2G149567	Zm00001d029983	GRMZM2G007939
GRMZM2G132519	Zm00001d029049	GRMZM2G056424
GRMZM2G030312	Zm00001d004153	GRMZM2G118697
GRMZM2G399183	Zm00001d014180	GRMZM2G075077
GRMZM2G020856	Zm00001d040051	GRMZM2G340342
GRMZM2G049536	Zm00001d037260	GRMZM2G425647
GRMZM2G142913	Zm00001d020485	GRMZM5G837058
GRMZM2G037280	Zm00001d007767	GRMZM2G008919
GRMZM2G074735	Zm00001d007411	GRMZM2G166776
GRMZM2G092137	Zm00001d008477	GRMZM2G473511
GRMZM2G117357	Zm00001d021641	GRMZM2G360949
GRMZM2G172138	Zm00001d022647	GRMZM2G163242
GRMZM2G100067	Zm00001d030888	GRMZM2G443525
GRMZM2G013581	Zm00001d038680	GRMZM2G070192
GRMZM2G152111	Zm00001d020681	GRMZM5G847216
GRMZM2G117961	Zm00001d012931	GRMZM2G121826
GRMZM2G093838	Zm00001d050914	GRMZM2G397540
[truncated: 17,346 more rows]
